# Supplementary material for: Hospital Smoke-Free Policy: Compliance, Enforcement, and Practices. A Staff Survey in Two Large Public Hospitals in Australia
Source: MDPI journal article supplement (doi:10.3390/ijerph14111358), 2017-11-08
Supplement: s1 [file s1]

**Supplementary Table S1.** Survey items

| Question                                                                                                                                                                                                                                                                                                                                                                            | Response option  |
|-------------------------------------------------------------------------------------------------------------------------------------------------------------------------------------------------------------------------------------------------------------------------------------------------------------------------------------------------------------------------------------|------------------|
| Perceived policy enforcement                                                                                                                                                                                                                                                                                                                                                        |                  |
| How often is the total smoking ban enforced at your hospital?                                                                                                                                                                                                                                                                                                                       | Always           |
|                                                                                                                                                                                                                                                                                                                                                                                     | Often            |
|                                                                                                                                                                                                                                                                                                                                                                                     | Sometimes        |
|                                                                                                                                                                                                                                                                                                                                                                                     | Rarely           |
|                                                                                                                                                                                                                                                                                                                                                                                     | Never            |
|                                                                                                                                                                                                                                                                                                                                                                                     | Unsure           |
| Staff enforcement on other staff                                                                                                                                                                                                                                                                                                                                                    |                  |
| If you see a staff member smoking on campus, how often do you:<br>- Ask them to stop smoking?<br>- Ask them to go outside the hospital premises for smoking?                                                                                                                                                                                                                        | Always           |
|                                                                                                                                                                                                                                                                                                                                                                                     | Often            |
|                                                                                                                                                                                                                                                                                                                                                                                     | Sometimes        |
|                                                                                                                                                                                                                                                                                                                                                                                     | Rarely           |
|                                                                                                                                                                                                                                                                                                                                                                                     | Never            |
|                                                                                                                                                                                                                                                                                                                                                                                     | Unsure           |
|                                                                                                                                                                                                                                                                                                                                                                                     | Not applicable   |
| Staff enforcement on patients                                                                                                                                                                                                                                                                                                                                                       |                  |
| If you see a patient smoking on campus, how often do you:<br>- Ask them to stop smoking?<br>- Ask them to go outside the hospital premises for smoking?<br>- Offer them Nicotine Replacement Therapy instead of smoking?                                                                                                                                                            | Always           |
|                                                                                                                                                                                                                                                                                                                                                                                     | Often            |
|                                                                                                                                                                                                                                                                                                                                                                                     | Sometimes        |
|                                                                                                                                                                                                                                                                                                                                                                                     | Rarely           |
|                                                                                                                                                                                                                                                                                                                                                                                     | Never            |
|                                                                                                                                                                                                                                                                                                                                                                                     | Unsure           |
|                                                                                                                                                                                                                                                                                                                                                                                     | Not applicable   |
| Perceived policy compliance                                                                                                                                                                                                                                                                                                                                                         |                  |
| How often do patients from your ward who smoke adhere to the smoking restrictions at the hospital?                                                                                                                                                                                                                                                                                  | Always           |
|                                                                                                                                                                                                                                                                                                                                                                                     | Often            |
|                                                                                                                                                                                                                                                                                                                                                                                     | Sometimes        |
|                                                                                                                                                                                                                                                                                                                                                                                     | Rarely           |
|                                                                                                                                                                                                                                                                                                                                                                                     | Never            |
|                                                                                                                                                                                                                                                                                                                                                                                     | Unsure           |
| How well are the hospital smoking restrictions adhered to by staff? That is, for staff members who smoke, how well do they adhere to the hospital no smoking policy?                                                                                                                                                                                                                | Always           |
|                                                                                                                                                                                                                                                                                                                                                                                     | Often            |
|                                                                                                                                                                                                                                                                                                                                                                                     | Sometimes        |
|                                                                                                                                                                                                                                                                                                                                                                                     | Rarely           |
|                                                                                                                                                                                                                                                                                                                                                                                     | Never            |
|                                                                                                                                                                                                                                                                                                                                                                                     | Unsure           |
| Provision of smoking cessation care                                                                                                                                                                                                                                                                                                                                                 |                  |
| When talking to a patient who had identified as a current smoker, how often do you:<br>- Ask them about their current level of use<br>- Advise them to quit<br>- Assess their willingness to quit<br>- Assist them with a quit plan<br>- Refer them to specialist stop smoking services or counsellor<br>- Refer them to telephone Quitline<br>- Offer Nicotine Replacement Therapy | Always           |
|                                                                                                                                                                                                                                                                                                                                                                                     | Most of the time |
|                                                                                                                                                                                                                                                                                                                                                                                     | Rarely           |
|                                                                                                                                                                                                                                                                                                                                                                                     | Never            |
|                                                                                                                                                                                                                                                                                                                                                                                     |                  |

|                                                                                                                                                                                                                                      |                                                       |
|--------------------------------------------------------------------------------------------------------------------------------------------------------------------------------------------------------------------------------------|-------------------------------------------------------|
| <ul style="list-style-type: none"> <li>- Offer them other pharmacotherapies to help them quit</li> <li>- Provide post-discharge help to quit</li> <li>- Arrange follow-up with them either by yourself or another service</li> </ul> |                                                       |
| In your hospital, how is the decision concerning whether or not to provide hospitalised patients who smoke with assistance to quit made?                                                                                             | Assistance is offered to every patient who smokes     |
|                                                                                                                                                                                                                                      | Assistance is offered on a patient-by-patient basis   |
|                                                                                                                                                                                                                                      | Assistance is offered only if the patient requests it |
|                                                                                                                                                                                                                                      | Unsure                                                |

**Supplementary Table S2.** Sociodemographic characteristics of sample.

| Variable           |                                                                                    | Total (n= 805)<br>n (%) |
|--------------------|------------------------------------------------------------------------------------|-------------------------|
| Gender             | Male                                                                               | 130 (20.1%)             |
|                    | Female                                                                             | 518 (79.9%)             |
| Age                | Mean (SD)                                                                          | 42.45 (12.3)            |
| Role at hospital   | Intern                                                                             | 11 (1.4%)               |
|                    | Resident (Junior resident, senior resident)                                        | 25 (3.1%)               |
|                    | Registrar (Junior registrar, unaccredited registrar, accredited registrar, fellow) | 57 (7.1%)               |
|                    | Consultant                                                                         | 81 (10.1%)              |
|                    | Division 1 nurse (registered)                                                      | 405 (50.3%)             |
|                    | Division 2 nurse (enrolled)                                                        | 27 (3.4%)               |
|                    | Other                                                                              | 199 (24.7%)             |
| Employment         | Full-time                                                                          | 482 (61.7%)             |
|                    | Part-time                                                                          | 268 (34.3%)             |
|                    | Casual                                                                             | 19 (2.4%)               |
|                    | Other                                                                              | 12 (1.5%)               |
| Time at hospital   | Less than 12 months                                                                | 49 (6.3%)               |
|                    | 1-3 years                                                                          | 105 (13.5%)             |
|                    | 4-6 years                                                                          | 129 (16.5%)             |
|                    | 7-9 years                                                                          | 102 (13.1%)             |
|                    | 10 or more years                                                                   | 395 (50.9%)             |
| Smoking status     | Smoker                                                                             | 36 (5.6%)               |
|                    | Non-smoker                                                                         | 609 (94.4%)             |
| Intentions to quit | Quit in the next 30 days                                                           | 5 (13.9%)               |
|                    | Quit in the next 6 months                                                          | 8 (22.2%)               |
|                    | Quit, but not in the next 6 months                                                 | 6 (16.7%)               |
|                    | Never quit/Unsure                                                                  | 17 (47.2%)              |
