# Supplementary material for: Hospital Smoke-Free Policy: Compliance, Enforcement, and Practices. A Staff Survey in Two Large Public Hospitals in Australia
Source: Int J Environ Res Public Health. 2017 Nov 8;14(11):1358. doi: 10.3390/ijerph14111358 (PMC5707997; doi:10.3390/ijerph14111358)
Supplement: Supplementary file 1 [file ijerph-14-01358-s001.zip › Supplementary data file- .csv file of participant responses.csv]

Survey	Instance	ResultID	Participant	UUID	Status	Date	Time	Completed	Site ID	Gender	dob	Year of birth -02 - duplicate	Do you currently smoke tobacco?	100 cigarettes	Were you born in Australia? - duplicate	Were you born in Australia? - duplicate[2_text]	ATSI	Postcode - duplicate - duplicate - duplicate	Marital Status	Education	Income - duplicate	Income - duplicate[5_text]	Household income - duplicate	Insurance[1]	Insurance[2]	Insurance[3]	Insurance[4]	Insurance[5]	Insurance[6]	Tobacco type preference	Tobacco type preference[8_text]	Number of cigarettes per day-HIS02	Age when first started smoking - duplicate	TTFC	Average tobacco spending per week - duplicate2 - d	Quitting	Number of quit attempts 12 mths	Most recent quit attempt - duplicate	28 Length of quit attempt	Methods to quit - duplicate[order]	Methods to quit - duplicate[1]	Methods to quit - duplicate[2]	Methods to quit - duplicate[3]	Methods to quit - duplicate[4]	Methods to quit - duplicate[5]	Methods to quit - duplicate[6]	Methods to quit - duplicate[7]	Methods to quit - duplicate[8]	Methods to quit - duplicate[9]
Smoke-Free Recovery	10	28374	1001	550f5cca-c9ac-4d2e-b777-7ee986948896		1/04/2015	09:47:43	Yes	1	1		1985	4		1		4	2305	1	5	1		3	0	0	0	0	0	1
Smoke-Free Recovery	10	28376	1002	55123465-6da0-484d-94d5-2e1286948896		1/04/2015	10:19:00	No	1	1		1953	1		1		4	2285	4	3	2		1	0	0	0	0	1	0	1		5	13	2	120	1	1	1-Oct-14	56	2=Stop-smoking medication prescribed by a doctor called Zyban, Prexaton or Bupropion|5=Nicotine Replacement Therapy (NRT) (gum, patches, inhaler, lozenge, spray) brought without a prescription (e.g. from the supermarket or chemist)|9=Internet support|4=Nicotine Replacement Therapy (NRT) (gum, patches, inhaler, lozenge, spray) recommended by a doctor|7=Alternative therapies such as herbal or natur…	0	0	0	0	1	0	0	0	0
Smoke-Free Recovery	10	28408	1003	551c6eb9-f540-4ddc-b28f-611d86948896		2/04/2015	09:18:33	No	1	2		1945	4		1		4	2326	1	5	2		2	0	0	0	0	1	0
Smoke-Free Recovery	10	28409	1004	551c7466-5834-4e86-8ba0-612386948896		2/04/2015	09:42:47	No	1	2		1926	4		1		4	0	1	3	2		6
Smoke-Free Recovery	10	28410	1005	551c7647-7c90-4bf6-b5c1-262886948896		2/04/2015	09:50:48	Yes	1	1		1968	4		1		4	2299	1	4	1		5	0	0	0	0	0	1
Smoke-Free Recovery	10	28412	1006	551c8a91-e0fc-4dbe-8373-612386948896		2/04/2015	11:17:22	Yes	1	2		1994	4		2	USA	4	2308	4	4	3		5	0	1	0	0	0	0
Smoke-Free Recovery	10	28451	1007	55232bea-a0e8-42c0-9052-5f7386948896		7/04/2015	10:59:23	Yes	1	2		1930	4		2	Holland	4	2300	5	3	4		6	0	0	1	0	0	0
Smoke-Free Recovery	10	28453	1008	55233273-7130-4a91-961c-7efb86948896		7/04/2015	11:27:16	Yes	1	2		1937	4		2	Scotland	4	2317	5	3	4		6	0	0	1	0	0	0
Smoke-Free Recovery	10	28454	1009	55233887-7514-402f-a832-7efc86948896		7/04/2015	11:53:12	Yes	1	2		1945	4		1		4	2282	1	3	2		2	0	0	0	0	1	0
Smoke-Free Recovery	10	28456	1010	55233c52-c4c4-4ece-9524-0db986948896		7/04/2015	12:09:22	Yes	1	1		1955	4		2	Scotland	4	2304	4	6	2		2	0	0	0	0	0	1
Smoke-Free Recovery	10	28458	1011	552344ec-66c4-40e3-a5f6-0f4686948896		7/04/2015	12:46:05	No	1	1		1942	4		1		4	2287	3	3	2		2	0	0	0	0	1	0
Smoke-Free Recovery	10	28461	1020	5523474a-0c54-48fa-925c-0db986948896		7/04/2015	12:57:00	No	1	2		1987	4		1		4	2280	2	4	1		2	1	0	0	0	0	0
Smoke-Free Recovery	10	28462	1012	552347a2-0ee0-4d2b-adc5-444286948896		7/04/2015	12:57:38	No	1	2		1938	4		1		4	2306	1	5	2		3	0	0	0	0	1	0
Smoke-Free Recovery	10	28464	1014	55235469-ae58-4d5d-8d2d-7efb86948896		7/04/2015	13:52:10	Yes	1	2		1945	4		1		4	2088	5	5	1		3	1	0	0	0	0	0
Smoke-Free Recovery	10	28465	1013	5523546b-7804-4b42-bcaf-7efa86948896		7/04/2015	13:52:12	Yes	1	2		1927	4		1		4	2289	5	4	2		2	0	1	0	0	0	0
Smoke-Free Recovery	10	28466	1015	55235881-d2fc-4ea8-a791-7ef786948896		7/04/2015	14:09:38	Yes	1	2		1922	4		2	Poland	4	2290	1	2	2		2	0	0	0	0	1	0
Smoke-Free Recovery	10	28478	1016	552482f5-c0f4-4bbb-9fa2-0db986948896		8/04/2015	11:23:02	No	1	1		1963	1		1		4	2322	1	3	1		4	0	0	0	0	0	1	1		25	15	1	120	1	1	1-Feb-15	1	4=Nicotine Replacement Therapy (NRT) (gum, patches, inhaler, lozenge, spray) recommended by a doctor|3=A stop-smoking medication prescribed by a doctor called Varenicline or Champix|5=Nicotine Replacement Therapy (NRT) (gum, patches, inhaler, lozenge, spray) brought without a prescription (e.g. from the supermarket or chemist)|1=Own will-power, no help|11=Going to see a GP|9=Internet support|2=St…	0	0	0	0	1	0	0	0	0
Smoke-Free Recovery	10	28479	1017	5524839f-b458-495b-9364-3cc186948896		8/04/2015	11:25:52	Yes	1	2		1928	4		1		4	0	5	3	2		2	0	0	0	1	0	0
Smoke-Free Recovery	12	28528	1018	5525b189-2b74-4047-bac9-4f8686948896		9/04/2015	08:54:02	No	1	2		1941	4	1	1		4	2207	1	3	2		2	1	0	0	0	0	0
Smoke-Free Recovery	12	28529	1019	5525b54f-8994-4efe-810c-64ad86948896		9/04/2015	09:10:08	No	1	2		1958	1	1	1		4	2290	1	6	1		4	1	0	0	0	0	0	1		20	14	3	150	1	0	1-Apr-13	0	9=Internet support|1=Own will-power, no help|2=Stop-smoking medication prescribed by a doctor called Zyban, Prexaton or Bupropion|11=Going to see a GP|8=Group counselling|6=Self-help book or brochure|5=Nicotine Replacement Therapy (NRT) (gum, patches, inhaler, lozenge, spray) brought without a prescription (e.g. from the supermarket or chemist)|3=A stop-smoking medication prescribed by a doctor c…	0	0	0	0	0	0	0	0	0
Smoke-Free Recovery	13	28542	1021	5525cb45-25c0-46d6-a7b1-64ae86948896		9/04/2015	10:43:49	No	1	1		1955	4	1	1		1	2318	4	5	5	shares	1	0	0	0	0	1	0
Smoke-Free Recovery	13	28570	1022	5527134d-fc44-473e-bff9-6b9e86948896		10/04/2015	10:03:26	No	1	1		1993	4	2	2	USA	4	2291	4	4	1		1	1	0	0	0	0	0
Smoke-Free Recovery	13	28572	1023	552717af-dbe0-4d64-9ce0-362a86948896		10/04/2015	10:22:08	No	1	2		1946	4	2	1		4	2304	4	5	2		1	1	0	0	0	0	0
Smoke-Free Recovery	13	28636	1024	552b0c99-eea8-4478-99cd-2bda86948896		13/04/2015	10:23:54	No	1	2		1939	1	1	1		4	2291	5	5	2		2	0	0	0	0	1	0	1		10	20	0	50	1	0	13-Apr-12	14	9=Internet support|2=Stop-smoking medication prescribed by a doctor called Zyban, Prexaton or Bupropion|6=Self-help book or brochure|11=Going to see a GP|1=Own will-power, no help|3=A stop-smoking medication prescribed by a doctor called Varenicline or Champix|10=Telephone support (like Quitline)|8=Group counselling|4=Nicotine Replacement Therapy (NRT) (gum, patches, inhaler, lozenge, spray) reco…	0	0	0	0	0	0	0	0	0
Smoke-Free Recovery	13	28651	1025	552b32d4-5190-4905-8aa3-693886948896		13/04/2015	13:07:01	No	1	2		1974	4	2	1		4	2307	2	3	2		6	0	0	0	0	1	0
Smoke-Free Recovery	13	28654	1026	552b388b-3254-4a88-afc0-200486948896		13/04/2015	13:31:24	No	1	1		1970	1	1	1		4	2830	3	6	1		5	0	0	0	0	0	1	1		15	22	2	70	1	0	13-Apr-14	4	11=Going to see a GP|10=Telephone support (like Quitline)|9=Internet support|1=Own will-power, no help|6=Self-help book or brochure|4=Nicotine Replacement Therapy (NRT) (gum, patches, inhaler, lozenge, spray) recommended by a doctor|2=Stop-smoking medication prescribed by a doctor called Zyban, Prexaton or Bupropion|8=Group counselling|7=Alternative therapies such as herbal or natural remedies, h…	0	0	0	0	0	0	0	0	0
Smoke-Free Recovery	13	28655	1027	552b4006-cb78-4ae4-92e6-200486948896		13/04/2015	14:03:19	No	1	2		1989	4	2	1		4	2284	2	6	1		5	1	0	0	0	0	0
Smoke-Free Recovery	13	28667	1028	552c4e42-990c-40aa-860d-30c686948896		14/04/2015	09:16:19	No	1	2		1971	4	2	1		4	2106	1	6	1		5	1	0	0	0	0	0
Smoke-Free Recovery	13	28668	1029	552c5147-bad4-4172-be1d-200486948896		14/04/2015	09:29:12	Yes	1	1		1987	4	2	1		4	2295	1	5	1		4	0	1	0	0	0	0
Smoke-Free Recovery	13	28669	1030	552c52e6-36fc-4651-a236-2bda86948896		14/04/2015	09:36:07	No	1	2
Smoke-Free Recovery	13	28701	1031	552da9c1-4624-44e0-a85e-335f86948896		15/04/2015	09:58:58	No	1	1		1959	1	1	1		4	2280	4	3	1		3	0	0	0	0	0	1	1		30	15	3	175	1	2	31-Jan-15	2	6=Self-help book or brochure|10=Telephone support (like Quitline)|11=Going to see a GP|4=Nicotine Replacement Therapy (NRT) (gum, patches, inhaler, lozenge, spray) recommended by a doctor|8=Group counselling|5=Nicotine Replacement Therapy (NRT) (gum, patches, inhaler, lozenge, spray) brought without a prescription (e.g. from the supermarket or chemist)|7=Alternative therapies such as herbal or na…	0	0	0	0	1	0	0	0	0
Smoke-Free Recovery	13	28712	1032	552db40d-6318-445a-b56a-335f86948896		15/04/2015	10:42:54	Yes	1	1		1985	4	1	2	Newzealand	4	0	2	4	1		3	0	0	0	0	0	1
Smoke-Free Recovery	13	28730	1033	552dcd22-0a48-48a9-91dc-74ae86948896		15/04/2015	12:29:55	No	1	1		1963	1	1	1		4	2069	1	5	1		5	1	0	0	0	0	0	1		7	17	0	50	1	2	25-Dec-14	3	2=Stop-smoking medication prescribed by a doctor called Zyban, Prexaton or Bupropion|10=Telephone support (like Quitline)|7=Alternative therapies such as herbal or natural remedies, hypnosis, relaxation or accupuncture|5=Nicotine Replacement Therapy (NRT) (gum, patches, inhaler, lozenge, spray) brought without a prescription (e.g. from the supermarket or chemist)|1=Own will-power, no help|9=Inter…	1	0	0	0	1	0	0	0	0
Smoke-Free Recovery	13	28824	1034	552ef95d-5124-405f-99fb-4bf786948896		16/04/2015	09:50:54	No	1	2		1950	4	2	1		4	2428	3	5	1		2	1	0	0	0	0	0
Smoke-Free Recovery	13	28841	1035	552f05d4-7554-45b5-b0b7-788f86948896		16/04/2015	10:44:05	No	1	1		1936	4	1	1		4	0	1	4	5	Self funded retired	4	1	0	0	0	0	0
Smoke-Free Recovery	13	28842	1036	552f0b32-cdcc-4ee4-bec6-5c2b86948896		16/04/2015	11:06:59	Yes	1	2		1960	4	1	1		4	2306	3	3	2		2	0	0	0	0	1	0
Smoke-Free Recovery	13	28847	1037	552f11e2-55dc-49c7-b027-4bf786948896		16/04/2015	11:35:30	Yes	1	1		1969	4	1	1		4	2324	2	3	1		3	1	0	0	0	0	0
Smoke-Free Recovery	13	28849	1038	552f17ac-cb6c-42c7-8c1a-4bf786948896		16/04/2015	12:00:13	No	1	1		1968	4	2	1		4	2590	1	5	1		4	0	1	0	0	0	0
Smoke-Free Recovery	13	28996	1039	55304b13-0678-457a-b223-13c586948896		17/04/2015	09:51:48	Yes	1	2		1966	4	2	1		4	2330	2	4	5	Baby sitting	1	0	0	0	0	0	1
Smoke-Free Recovery	13	28999	1041	5530528c-d1f0-46a8-a6a2-41d786948896		17/04/2015	10:23:41	No	1	1		1988	4	1	1		4	2337	4	4	1		6	0	0	0	0	0	1
Smoke-Free Recovery	13	29000	1040	553052ad-14ac-4203-94f8-332686948896		17/04/2015	10:24:14	No	1	1		1997	1	1	1		4	2290	4	3	1		1	1	0	0	0	0	0	2		12	16	2	30	2
Smoke-Free Recovery	13	29543	1042	5531a84e-1bfc-4e68-bf1f-6ac886948896		18/04/2015	10:41:51	Yes	1	1		1984	4	2	1		4	2390	2	5	1		5	0	0	0	0	0	1
Smoke-Free Recovery	13	29554	1043	5531b0ca-6254-47b0-a635-41d786948896		18/04/2015	11:18:02	No	1	2		1953	1	1	1		4	2325	3	3	2		2	0	0	0	0	1	0	1		40	14	3	150	2
Smoke-Free Recovery	13	29564	1044	5531b95c-e480-4d6c-85cd-33f986948896		18/04/2015	11:54:37	No	1	2		1972	1	1	1		4	2285	1	4	3		3	1	0	0	0	0	0	1		15	16	2	80	1	3	1-Feb-15	4	7=Alternative therapies such as herbal or natural remedies, hypnosis, relaxation or accupuncture|8=Group counselling|9=Internet support|10=Telephone support (like Quitline)|1=Own will-power, no help|2=Stop-smoking medication prescribed by a doctor called Zyban, Prexaton or Bupropion|5=Nicotine Replacement Therapy (NRT) (gum, patches, inhaler, lozenge, spray) brought without a prescription (e.g. f…	0	0	0	0	1	0	0	0	0
Smoke-Free Recovery	13	30065	1045	55331721-46f0-4b99-b194-3f6486948896		19/04/2015	12:49:02	No	1	1		1959	4	2	1		4	2425	1	5	1		5	0	0	1	0	0	0
Smoke-Free Recovery	13	30070	1046	5533173a-2f54-4119-9328-256286948896		19/04/2015	13:05:47	No	1	1		1945	4	2	1		4	2327	1	4	2		6	0	0	0	0	1	0
Smoke-Free Recovery	13	30078	1047	55332029-5888-451b-876d-21b386948896		19/04/2015	13:25:30	Yes	1	1		1984	4	2	1		4	2285	1	4	1		2	0	0	0	0	0	1
Smoke-Free Recovery	13	30086	1048	553327c9-a18c-4e0c-a901-704b86948896		19/04/2015	13:58:01	Yes	1	2		1954	4	2	1		4	2285	5	3	1		2	0	0	0	0	0	1
Smoke-Free Recovery	13	30101	1049	55332db2-405c-45dd-b717-21b486948896		19/04/2015	14:23:15	No	1	2		1975	4	2	1		4	2455	3	3	2		2	0	0	0	0	1	0
Smoke-Free Recovery	13	30609	1050	55331788-c144-41cc-afb4-573486948896		20/04/2015	10:42:42	No	1	2		1936	4	3	1		4	0	1	5	4		6	1	0	0	0	0	0
Smoke-Free Recovery	13	30625	1051	55345276-84d0-4300-9442-6e5886948896		20/04/2015	11:12:22	No	1	2		1973	4	2	1		4	2455	4	5	2		1	0	0	0	0	1	0
Smoke-Free Recovery	13	30641	1052	55345877-472c-4ea8-9f12-2ecd86948896		20/04/2015	11:37:59	Yes	1	1		1983	4	2	1		4	2318	1	5	1		5	0	0	0	0	0	1
Smoke-Free Recovery	13	30707	1053	553475dc-594c-41ab-a78f-2ed286948896		20/04/2015	13:43:26	No	1	1		1957	4	2	1		4	2360	2	5	1		3	0	0	0	0	0	1
Smoke-Free Recovery	13	31240	1054	55358d65-8054-4dc2-8bd1-2ed086948896		21/04/2015	09:36:07	No	1	1		1994	1	1	1		4	2264	4	3	2		6	0	0	0	0	1	0	1		15	17	2	50	1	3	10-Feb-15	2	11=Going to see a GP|5=Nicotine Replacement Therapy (NRT) (gum, patches, inhaler, lozenge, spray) brought without a prescription (e.g. from the supermarket or chemist)|2=Stop-smoking medication prescribed by a doctor called Zyban, Prexaton or Bupropion|6=Self-help book or brochure|7=Alternative therapies such as herbal or natural remedies, hypnosis, relaxation or accupuncture|8=Group counselling|…	1	0	0	0	0	0	0	0	0
Smoke-Free Recovery	13	31243	1055	55359375-0f84-4dc4-972b-60ce86948896		21/04/2015	10:01:59	No	1	1		1940	4	1	1		4	2420	2	4	2		1	0	0	0	0	1	0
Smoke-Free Recovery	13	32917	Sam	543c77f6-b9f0-4ddb-aaeb-285f86948896		23/04/2015	07:59:55	No	1
Smoke-Free Recovery	13	33120	1056	55386274-d8dc-451f-ab0b-680a86948896		23/04/2015	13:09:41	No	1	1		1954	4	2	1		4	2285	1	5	2		3	0	0	1	0	0	0
Smoke-Free Recovery	13	33141	1057	55386a2c-1810-4193-96b5-7ebc86948896		23/04/2015	13:42:36	No	1	1		1944	4	1	1		4	2304	1	6	1		2	1	0	0	0	0	0
Smoke-Free Recovery	13	33208	1058	55388836-52cc-4fc4-9ea1-6ea986948896		23/04/2015	15:50:47	No	1	1		1939	4	2	2	Italy	4	2322	1	5	4		6	0	0	0	0	1	0
Smoke-Free Recovery	13	38577	1059	553d84fe-a9a8-4823-a533-6b2f86948896		27/04/2015	10:38:23	No	1	2		1952	4	2	1		4	2304	1	3	3		2	1	0	0	0	0	0
Smoke-Free Recovery	13	38586	1060	553d86f6-01a0-49f0-93f0-26d586948896		27/04/2015	10:46:46	No	1	1		1945	1	1	1		4	2283	1	1	2		2	1	0	0	0	0	0	1		15	12	3	120	1	1	23-Apr-15	4	6=Self-help book or brochure|4=Nicotine Replacement Therapy (NRT) (gum, patches, inhaler, lozenge, spray) recommended by a doctor|8=Group counselling|5=Nicotine Replacement Therapy (NRT) (gum, patches, inhaler, lozenge, spray) brought without a prescription (e.g. from the supermarket or chemist)|1=Own will-power, no help|2=Stop-smoking medication prescribed by a doctor called Zyban, Prexaton or B…	1	0	0	0	0	0	0	0	0
Smoke-Free Recovery	13	38646	1061	553d9676-99d8-4ec5-b73f-324d86948896		27/04/2015	11:52:54	Yes	1	2		1973	4	2	1		4	2298	1	4	1		4	0	0	1	0	0	0
Smoke-Free Recovery	13	39910	1062	553ebeeb-a73c-414e-b4dc-213586948896		28/04/2015	08:57:48	No	1	1		1960	4	1	1		4	2298	4	5	2		1	0	0	0	0	1	0
Smoke-Free Recovery	13	41555	1063	55403ba4-309c-4322-9d12-36aa86948896		29/04/2015	12:02:13	No	1	1		1954	4	2	1		4	2283	1	5	2		1	1	0	0	0	0	0
Smoke-Free Recovery	13	41561	1064	55403fb5-ac68-4ab3-8e6b-39c386948896		29/04/2015	12:19:34	No	1	2		1974	1	1	1		4	2299	2	3	1		4	0	0	0	0	0	1	1		12	17	2	70	1	2	1-Jan-15	4	1=Own will-power, no help|10=Telephone support (like Quitline)|11=Going to see a GP|4=Nicotine Replacement Therapy (NRT) (gum, patches, inhaler, lozenge, spray) recommended by a doctor|6=Self-help book or brochure|7=Alternative therapies such as herbal or natural remedies, hypnosis, relaxation or accupuncture|9=Internet support|2=Stop-smoking medication prescribed by a doctor called Zyban, Prexat…	1	0	0	0	0	0	0	0	0
Smoke-Free Recovery	13	42689	1065	554162ee-a030-4820-a8e3-346986948896		30/04/2015	09:02:07	No	1	1		1986	1	1	1		1	2294	4	6	2		2	0	0	0	0	0	1	1		20	20	2	50	1	2	22-Apr-15	4	4=Nicotine Replacement Therapy (NRT) (gum, patches, inhaler, lozenge, spray) recommended by a doctor|6=Self-help book or brochure|9=Internet support|11=Going to see a GP|8=Group counselling|5=Nicotine Replacement Therapy (NRT) (gum, patches, inhaler, lozenge, spray) brought without a prescription (e.g. from the supermarket or chemist)|1=Own will-power, no help|3=A stop-smoking medication prescrib…	0	0	0	1	0	0	0	0	0
Smoke-Free Recovery	13	42733	1066	55416b01-0e24-4881-bdc6-35e486948896		30/04/2015	09:36:34	Yes	1	1		1961	4	1	1		4	2287	4	3	2		1	0	0	0	0	1	0
Smoke-Free Recovery	13	42750	1067	55416efc-d610-4d91-b7d8-1c1c86948896		30/04/2015	09:53:33	No	1	2		1937	2	1	2	England	4	2238	2	5	2		2	0	0	0	0	1	0	1		5	19	0	25	2
Smoke-Free Recovery	13	44054	1068	5542bb37-5d88-41f3-a534-7dba86948896		1/05/2015	09:31:04	No	1	2		1950	4	2	1		4	2264	1	5	1		6	0	0	0	0	0	1
Smoke-Free Recovery	13	46898	1069	5546aaac-c8e0-4f5e-9110-7d3286948896		4/05/2015	09:09:33	No	1	1		1960	4	1	1		4	2320	1	4	1		4	0	0	0	0	0	1
Smoke-Free Recovery	13	46901	1070	5546ac01-f1c8-4c29-aead-7d2f86948896		4/05/2015	09:15:15	No	1	2		1967	4	2	1		4	2450	4	6	2		2	1	0	0	0	0	0
Smoke-Free Recovery	13	46924	1071	5546b7b9-85ec-40bf-8f29-4b3086948896		4/05/2015	10:05:13	Yes	1	2		1991	4	2	1		4	2031	4	4	1		2	1	0	0	0	0	0
Smoke-Free Recovery	13	46928	1072	5546bb0e-d0f0-4a65-a97a-3f1586948896		4/05/2015	10:19:26	No	1	1		1959	1	1	1		4	2263	2	5	1		1	0	0	0	0	0	1	1		25	36	3	140	1	1	18-Mar-15	3	7=Alternative therapies such as herbal or natural remedies, hypnosis, relaxation or accupuncture|8=Group counselling|5=Nicotine Replacement Therapy (NRT) (gum, patches, inhaler, lozenge, spray) brought without a prescription (e.g. from the supermarket or chemist)|3=A stop-smoking medication prescribed by a doctor called Varenicline or Champix|9=Internet support|4=Nicotine Replacement Therapy (NRT…	0	0	0	1	0	0	0	0	0
Smoke-Free Recovery	13	46960	1073	5546ca31-4fe0-416e-9170-3f1586948896		4/05/2015	11:24:01	No	1	1		1955	1	1	1		4	2304	2	3	1		4	1	0	0	0	0	0	1		25	13	2	200	2
Smoke-Free Recovery	13	46968	1074	5546ce44-64dc-41ed-bb35-1d1f86948896		4/05/2015	11:41:25	No	1	1		1941	4	1	1		4	2259	1	6	4		3	0	0	0	0	1	0
Smoke-Free Recovery	13	47393	1075	5547f3ee-a610-45d7-a229-0f2e86948896		5/05/2015	08:34:23	No	1	2		1990	4	2	1		4	2287	4	5	1		2	0	0	0	0	0	1
Smoke-Free Recovery	13	47398	1076	5547fa05-5274-4853-b454-6bbf86948896		5/05/2015	09:00:22	Yes	1	1		1953	4	1	2	Guatemala, Central America	4	0	3	5	5	Coffee trader	6	0	0	0	0	0	1
Smoke-Free Recovery	13	47903	1077	554957f9-2798-4da7-886e-78da86948896		6/05/2015	09:53:30	No	1	1		1955	4	2	1		4	2325	1	5	5	self employed	3	1	0	0	0	0	0
Smoke-Free Recovery	13	47909	1078	55495d8e-0374-4bea-a29a-4d0686948896		6/05/2015	10:17:18	No	1	2		1937	1	1	1		4	2295	5	3	5	pension, dividends and superannuation	2	0	0	0	0	1	0	1		6	20	0	50	1	3	16-Sep-14	90	10=Telephone support (like Quitline)|5=Nicotine Replacement Therapy (NRT) (gum, patches, inhaler, lozenge, spray) brought without a prescription (e.g. from the supermarket or chemist)|8=Group counselling|2=Stop-smoking medication prescribed by a doctor called Zyban, Prexaton or Bupropion|6=Self-help book or brochure|9=Internet support|7=Alternative therapies such as herbal or natural remedies, hy…	1	0	0	0	0	0	0	0	0
Smoke-Free Recovery	13	49859	1079	554c11a6-9388-4667-b547-7fe886948896		8/05/2015	11:30:15	No	1	1		1968	1	1	1		1	2304	4	3	1		3	0	0	0	0	0	1	1		15	16	2	100	1	2	3-May-15	4	5=Nicotine Replacement Therapy (NRT) (gum, patches, inhaler, lozenge, spray) brought without a prescription (e.g. from the supermarket or chemist)|2=Stop-smoking medication prescribed by a doctor called Zyban, Prexaton or Bupropion|10=Telephone support (like Quitline)|6=Self-help book or brochure|4=Nicotine Replacement Therapy (NRT) (gum, patches, inhaler, lozenge, spray) recommended by a doctor|…	0	1	0	0	1	0	0	0	0
Smoke-Free Recovery	13	52225	1080	554fde76-4ee4-47a1-af8b-24bf86948896		11/05/2015	08:40:55	Yes	1	1		1982	4	2	1		4	2333	1	4	1		5	1	0	0	0	0	0
Smoke-Free Recovery	13	52229	1081	554fdf6f-24c0-4f62-b02f-2de686948896		11/05/2015	08:45:05	No	1	1		1969	4	1	1		4	2299	3	5	1
Smoke-Free Recovery	13	52255	1082	554fe4a8-76d8-4998-9319-6f1e86948896		11/05/2015	09:07:20	No	1	1		1995	4	2	1		1	2285	2	4	3		5	1	0	0	0	0	0
Smoke-Free Recovery	13	52257	1083	554fe5ca-e924-4418-9c68-113686948896		11/05/2015	09:12:11	Yes	1	2		1956	4	1	1		4	2324	4	6	4		6	1	0	0	0	0	0
Smoke-Free Recovery	13	52270	1084	554feab5-dd30-4dd9-a340-120586948896		11/05/2015	09:33:10	Yes	1	1		1987	4	2	1		4	2300	2	5	1		5	0	0	0	0	0	1
Smoke-Free Recovery	13	52273	1085	554fec08-5b68-491c-bef9-7dc386948896		11/05/2015	09:38:48	No	1	1		1959	4	1	2	Lebanon	4	2281	3	3	5	self employed	6	0	0	0	0	0	1
Smoke-Free Recovery	13	52284	1086	554ff002-2d9c-45cb-99c6-6f2186948896		11/05/2015	09:55:47	No	1	2		1943	4	2	1		4	2295	5	3	2		2	0	0	0	0	1	0
Smoke-Free Recovery	13	52348	1087	55500c11-54b8-4414-9899-325e86948896		11/05/2015	11:55:30	Yes	1	1		1945	4	2	1		4	2106	1	5	5	self employed	5	1	0	0	0	0	0
Smoke-Free Recovery	13	52460	test	53a0cd89-9314-44a3-8c17-171886948896		11/05/2015	16:56:38	No	1	1		2013
Smoke-Free Recovery	13	53349	1088	5551a8d9-5448-463e-ba98-678986948896		12/05/2015	17:16:42	Yes	1	2		1948	4	1	1		4	2291	1	5	3		5	1	0	0	0	0	0
Smoke-Free Recovery	13	53367	1089	5551ae19-9998-4cb7-85d1-65bc86948896		12/05/2015	17:39:06	Yes	1	2		1944	4	1	1		4	2280	5	5	4		5	1	0	0	0	0	0
Smoke-Free Recovery	13	54834	1090	55544670-0ce8-4a0a-90b7-319e86948896		14/05/2015	16:53:37	Yes	1	1		1983	4	2	1		4	2257	1	5	1		4	0	1	0	0	0	0
Smoke-Free Recovery	13	54847	1091	55544c5c-eefc-4b86-b216-614d86948896		14/05/2015	17:18:53	No	1	1		1982	4	2	1		4	2400	2	3	1		3	0	0	0	0	0	1
Smoke-Free Recovery	13	56368	1092	55594776-b214-460b-99c0-125286948896		18/05/2015	11:59:19	No	1	1		1952	4	2	1		4	2341	3	3	1		3	0	0	0	0	0	1
Smoke-Free Recovery	13	56369	1093	55594dff-53f4-4d01-86b6-125386948896		18/05/2015	12:27:12	No	1	1		1947	1	1	1		4	2304	2	5	2		3	0	0	0	0	1	0	1		20	15	1	100	1	1	11-May-15	7	11=Going to see a GP|7=Alternative therapies such as herbal or natural remedies, hypnosis, relaxation or accupuncture|4=Nicotine Replacement Therapy (NRT) (gum, patches, inhaler, lozenge, spray) recommended by a doctor|6=Self-help book or brochure|1=Own will-power, no help|3=A stop-smoking medication prescribed by a doctor called Varenicline or Champix|5=Nicotine Replacement Therapy (NRT) (gum, p…	1	0	0	0	0	0	0	0	0
Smoke-Free Recovery	13	56382	1094	555a69ec-a2fc-4051-99de-046d86948896		19/05/2015	08:38:36	Yes	1	2		1994	4	2	1		4	2319	2	5	1		2	0	0	0	0	0	1
Smoke-Free Recovery	13	56383	1095	555a6b4c-d314-4b65-a48b-0f7786948896		19/05/2015	08:44:29	No	1	2		1951	4	2	1		4	4020	3	4	2		2	0	0	0	0	1	0
Smoke-Free Recovery	13	56384	1096	555a7177-4efc-46e3-abf3-086986948896		19/05/2015	09:10:48	No	1	2		1938	4	2	1		4	2290	1	6	2		6	0	0	0	0	1	0
Smoke-Free Recovery	13	56385	1097	555a717e-5fe8-47ed-a7b3-086a86948896		19/05/2015	09:10:55	Yes	1	1		1997	4	2	1		4	2286	4	3	2		6	0	0	0	0	1	0
Smoke-Free Recovery	13	56386	1098	555a78c9-be30-4cde-8a62-086f86948896		19/05/2015	09:42:01	Yes	1	1		1980	4	2	1		4	2330	3	4	2		5	0	0	0	0	1	0
Smoke-Free Recovery	13	56387	1099	555a79c8-a85c-4d6f-ad77-0c5286948896		19/05/2015	09:46:17	Yes	1	2		1981	4	1	1		4	2315	1	6	1		5	1	0	0	0	0	0
Smoke-Free Recovery	13	56388	1100	555a7c13-1be8-4ae0-a852-046d86948896		19/05/2015	09:56:04	No	1	2		1985	4	2	1		4	2280	1	5	1		4	0	0	0	0	0	1
Smoke-Free Recovery	14	56412	1100	555a7c13-1be8-4ae0-a852-046d86948896		20/05/2015	12:17:42	No	1	1		1952	1	1	1		4	2295	5	3	2		2	0	0	0	0	1	0	2		10	14	3	50	1	1	5-May-05	6	2=Stop-smoking medication prescribed by a doctor called Zyban, Prexaton or Bupropion|3=A stop-smoking medication prescribed by a doctor called Varenicline or Champix|4=Nicotine Replacement Therapy (NRT) (gum, patches, inhaler, lozenge, spray) recommended by a doctor|9=Internet support|10=Telephone support (like Quitline)|8=Group counselling|5=Nicotine Replacement Therapy (NRT) (gum, patches, inha…	1	0	0	0	0	0	0	0	0
Smoke-Free Recovery	14	56413	1101	555bf2e6-406c-4e2e-9459-726986948896		20/05/2015	12:35:19	Yes	1	2		1953	4	2	1		4	2233	1	5	1		5	0	1	0	0	0	0
Smoke-Free Recovery	14	56418	1102	555d1ca6-7a84-406a-a6ae-276786948896		21/05/2015	09:45:43	Yes	1	2		1956	4	2	1		4	2285	1	6	3		4	1	0	0	0	0	0
Smoke-Free Recovery	14	56420	1103	555d20e3-9790-4b7e-b3c9-313686948896		21/05/2015	10:03:48	No	1	2		1953	1	1	1		4	2285	1	2	5	husband's pension	1	0	0	0	0	1	0	1		8	16	0	40	1	1	1-Jun-14	4	4=Nicotine Replacement Therapy (NRT) (gum, patches, inhaler, lozenge, spray) recommended by a doctor|2=Stop-smoking medication prescribed by a doctor called Zyban, Prexaton or Bupropion|8=Group counselling|1=Own will-power, no help|9=Internet support|6=Self-help book or brochure|5=Nicotine Replacement Therapy (NRT) (gum, patches, inhaler, lozenge, spray) brought without a prescription (e.g. from …	1	0	0	0	0	0	0	0	0
Smoke-Free Recovery	14	56421	1104	555d293d-2f3c-4467-97b1-726786948896		21/05/2015	10:39:26	No	1
Smoke-Free Recovery	15	58037	1104	555d293d-2f3c-4467-97b1-726786948896		24/05/2015	10:01:42	No	1	1		1997	1	1	1		4	2283	4	4	2		4	0	0	0	0	1	0	2		15	16	2	50	2
Smoke-Free Recovery	15	58816	1105	556260c9-9f94-483a-aecc-631886948896		25/05/2015	09:37:46	Yes	1	1		1939	4	2	1		4	2280	1	3	2		3	0	0	0	0	1	0
Smoke-Free Recovery	15	58840	1106	55626690-4f20-4182-9846-3aed86948896		25/05/2015	10:02:25	No	1	2		1965	1	1	1		4	2316	2	3	2		3	0	0	0	0	1	0	1		10	20	2	40	1	4	21-Jan-11	240	6=Self-help book or brochure|11=Going to see a GP|2=Stop-smoking medication prescribed by a doctor called Zyban, Prexaton or Bupropion|7=Alternative therapies such as herbal or natural remedies, hypnosis, relaxation or accupuncture|5=Nicotine Replacement Therapy (NRT) (gum, patches, inhaler, lozenge, spray) brought without a prescription (e.g. from the supermarket or chemist)|4=Nicotine Replaceme…	0	0	0	0	1	0	1	0	0
Smoke-Free Recovery	15	58864	1107	55626e02-4e00-46b0-b781-242686948896		25/05/2015	10:34:11	Yes	1	2		1955	4	3	1		4	2283	1	4	2		3	0	0	0	0	1	0
Smoke-Free Recovery	15	58867	1108	556271d2-cb98-4812-971e-2e0e86948896		25/05/2015	10:50:27	Yes	1	2		1930	4	2	1		4	2297	5	3	2		2	0	0	0	0	1	0
Smoke-Free Recovery	15	58869	1109	556273ea-8af8-490c-8dc3-242686948896		25/05/2015	10:59:23	No	1	2		1964	1	1	1		4	2430	4	6	1		4	1	0	0	0	0	0	1		20	18	3	140	1	3	1-Nov-12	10	5=Nicotine Replacement Therapy (NRT) (gum, patches, inhaler, lozenge, spray) brought without a prescription (e.g. from the supermarket or chemist)|3=A stop-smoking medication prescribed by a doctor called Varenicline or Champix|8=Group counselling|6=Self-help book or brochure|7=Alternative therapies such as herbal or natural remedies, hypnosis, relaxation or accupuncture|4=Nicotine Replacement Th…	1	0	0	0	0	0	0	0	0
Smoke-Free Recovery	15	58882	1110	55627a53-cb68-4bfb-94b7-2e0e86948896		25/05/2015	11:26:45	Yes	1	1		1946	4	2	1		4	2285	1	5	2		3	0	0	0	1	0	0
Smoke-Free Recovery	15	59602	1111	5563b515-f974-4da9-91b3-203d86948896		26/05/2015	09:49:43	Yes	1	1		1936	4	1	1		4	2280	5	3	2		3	0	0	0	0	1	0
Smoke-Free Recovery	15	59608	1112	5563b803-893c-43d0-8a2e-1f7d86948896		26/05/2015	10:02:12	Yes	1	1		1959	4	2	1		4	2315	1	5	2		4	0	0	0	1	0	0
Smoke-Free Recovery	15	59632	1113	5563c43a-74c4-4293-8a76-2fe586948896		26/05/2015	10:54:19	Yes	1	2		1953	4	2	1		4	2233	1	5	2		6	1	0	0	0	0	0
Smoke-Free Recovery	15	59633	Sam	543c77f6-b9f0-4ddb-aaeb-285f86948896		26/05/2015	10:55:31	Yes		2		2000	4	2	1		4	0	3	4	2		3	0	0	0	0	0	1
Smoke-Free Recovery	15	59644	1114	5563caac-4214-4349-9f76-5b9a86948896		26/05/2015	11:21:49	Yes	1	2		1971	4	2	1		4	2148	1	6	5	Family	1	0	0	0	0	0	1
Smoke-Free Recovery	15	59654	test	53a0cd89-9314-44a3-8c17-171886948896		26/05/2015	12:01:30	Yes		2		1935	4	2	1		4	2170	5	3	2		1	0	0	0	0	1	0
Smoke-Free Recovery	15	59694	1115	5563f6d3-a368-470a-996e-5b9a86948896		26/05/2015	14:30:11	No	1	1		1960	4	2	2	London	4	2316	3	6	1		4	0	0	0	0	0	1
Smoke-Free Recovery	15	59703	1116	5563ff24-a640-436e-a01e-203d86948896		26/05/2015	15:05:41	Yes	1	1		1983	4	2	1		4	2404	2	5	1		3	0	1	0	0	0	0
Smoke-Free Recovery	15	59708	1117	55640142-c4c4-4efb-a1e9-397886948896		26/05/2015	15:14:43	Yes	1	2		1959	4	2	1		4	2306	1	4	3		3	0	0	1	0	0	0
Smoke-Free Recovery	15	61828	1118	55679fa3-f5c4-4780-840f-72a586948896		29/05/2015	09:07:16	Yes	1	2		1959	4	1	2	Canada	4	2300	3	4	1		4	1	0	0	0	0	0
Smoke-Free Recovery	15	61850	1119	5567acbf-43b4-47e8-b1e5-58b886948896		29/05/2015	10:03:12	Yes	1	2		1946	4	2	1		4	2280	5	3	2		3	0	0	0	0	1	0
Smoke-Free Recovery	15	63270	1120	556a6ee8-b96c-47a7-89b2-3b9586948896		31/05/2015	12:16:09	Yes	1	2		1936	4	2	1		4	2289	5	3	2		1	0	0	0	0	1	0
Smoke-Free Recovery	15	63277	1121	556a72c4-01a4-4ccb-a1c2-6ddb86948896		31/05/2015	12:32:37	Yes	1	1		1990	4	1	1		4	2320	2	3	1		3	0	0	0	0	0	1
Smoke-Free Recovery	15	63288	1122	556a7958-6b40-4793-879c-6dd986948896		31/05/2015	13:00:41	Yes	1	2		1939	4	2	1		4	2316	5	3	2		2	0	0	0	0	1	0
Smoke-Free Recovery	15	64070	1123	556bd009-b5d0-498c-9621-311c86948896		1/06/2015	13:22:50	Yes	1	1		1972	4	2	2	New Zealand	4	987	4	5	1		4	0	0	0	0	0	1
Smoke-Free Recovery	15	64073	1124	556bd34b-be2c-42b7-8a4f-3c5c86948896		1/06/2015	13:36:43	No	1	1		1966	4	1	1		4	2295	1	5	1		5	1	0	0	0	0	0
Smoke-Free Recovery	15	64091	1125	556bdf12-da2c-469b-9f50-3a1886948896		1/06/2015	14:26:59	Yes	1	1		1990	4	2	1		4	2324	4	5	1		6	0	0	0	0	0	1
Smoke-Free Recovery	15	64100	1126	556be314-dda4-4d79-86c6-58fa86948896		1/06/2015	14:44:05	Yes	1	1		1947	4	2	1		4	2289	3	4	1		4	1	0	0	0	0	0
Smoke-Free Recovery	15	64104	1127	556be565-02d0-4948-a970-35f786948896		1/06/2015	14:53:58	Yes	1	1		1943	4	2	1		4	2371	1	3	2		2	0	0	0	0	1	0
Smoke-Free Recovery	15	64984	1128	556d1e9d-2b24-473f-a529-334b86948896		2/06/2015	13:10:22	Yes	1	1		1991	4	1	1		4	2330	2	5	1		4	0	0	0	0	0	1
Smoke-Free Recovery	15	64989	1129	556d225c-b388-4f11-8a38-339d86948896		2/06/2015	13:26:21	No	1	2		1965	1	1	1		4	2318	2	5	2		3	0	0	0	0	1	0	1		20	15	2	129	1	2	16-Apr-12	180	4=Nicotine Replacement Therapy (NRT) (gum, patches, inhaler, lozenge, spray) recommended by a doctor|3=A stop-smoking medication prescribed by a doctor called Varenicline or Champix|2=Stop-smoking medication prescribed by a doctor called Zyban, Prexaton or Bupropion|9=Internet support|7=Alternative therapies such as herbal or natural remedies, hypnosis, relaxation or accupuncture|11=Going to see …	0	0	0	1	0	0	0	0	0
Smoke-Free Recovery	15	64999	1130	556d28a9-ed24-427d-b6d9-241786948896		2/06/2015	13:53:14	No	1	2		1935	1	1	1		4	2287	3	4	2		1	0	0	0	0	1	0	1		25	14	3	110	2
Smoke-Free Recovery	15	65007	1131	556d2d8b-2ea4-40c3-b6e1-394886948896		2/06/2015	14:14:03	No	1	1		1951	4	1	1		4	2295	1	5	1		3	0	1	0	0	0	0
Smoke-Free Recovery	15	65751	1132	556e49f8-d0a4-4490-95dc-605686948896		3/06/2015	10:27:37	No	1	2		1934	4	2	1		4	2287	5	3	2		1	0	0	0	0	1	0
Smoke-Free Recovery	15	65754	1133	556e4be3-7d54-4fa8-8361-12f686948896		3/06/2015	10:35:48	Yes	1	1		1937	4	2	1		4	2291	5	6	1		5	1	0	0	0	0	0
Smoke-Free Recovery	15	65776	1134	556e55f4-9c3c-492b-9085-728986948896		3/06/2015	11:18:45	Yes	1	2		1967	4	2	1		4	2290	2	4	2		1	0	0	0	0	1	0
Smoke-Free Recovery	15	65784	1135	556e5801-5060-4c45-95b8-1ee786948896		3/06/2015	11:27:30	No	1	2		1982	1	1	1		4	2302	4	3	2		6	0	0	0	0	1	0	2		35	12	3	100	2
Smoke-Free Recovery	15	65858	1136	556e914d-a760-4784-85ee-12f686948896		3/06/2015	15:32:00	No	1	1		1936	1	1	1		4	2283	5	5	2		1	0	0	0	0	1	0	2		15	14	2	95	2
Smoke-Free Recovery	15	67428	1137	5570f021-a084-4ba6-9717-36d386948896		5/06/2015	10:41:06	No	1	1		1964	1	1	1		4	2294	1	5	1		4	0	0	0	0	0	1	1		23	13	3	100	2
Smoke-Free Recovery	15	71657	1138	5577c4dc-a45c-4d53-b9db-202b86948896		10/06/2015	15:02:21	Yes	1	1		1957	4	2	1		4	2283	1	4	2		2	0	0	0	0	1	0
Smoke-Free Recovery	17	72175	1139	5578a7c9-a5c0-4740-8626-4e5886948896		11/06/2015	07:10:34	No	1	2		1953	4	2	1		4	2291	1	6	1		4	0	0	1	0	0	0
Smoke-Free Recovery	17	72178	1140	552751b8-b3cc-4dc8-93ea-3be286948896		11/06/2015	07:18:33	No	1	1		1958	4	2	1		4	2304	2	5	1		5	1	0	0	0	0	0
Smoke-Free Recovery	17	72189	1141	5578ab49-16dc-45a3-a15d-7c9886948896		11/06/2015	07:25:30	No	1	1		1971	4	2	1		4	2333	4	5	1		4	1	0	0	0	0	0
Smoke-Free Recovery	17	72199	1142	5578adc2-b968-4149-ac86-62bd86948896		11/06/2015	07:36:03	No	1	1		1944	4	1	1		4	2303	3	3	2		3	0	0	0	0	1	0
Smoke-Free Recovery	17	72207	1143	5578b024-6f68-4318-89c0-7c9886948896		11/06/2015	07:46:13	No	1	1		1946	4	1	1		4	2262	2	5	1		3	1	0	0	0	0	0
Smoke-Free Recovery	17	72219	144	5578b318-62ac-4cc9-b971-107486948896		11/06/2015	07:58:49	No	1
Smoke-Free Recovery	17	72220	1144	5578b32c-1aec-4b0b-9f34-0fc386948896		11/06/2015	07:59:09	No	1	1		1967	4	1	1		4	2372	4	5	1		4	0	1	0	0	0	0
Smoke-Free Recovery	17	72302	1145	5578c019-23a0-4909-9211-05d786948896		11/06/2015	08:54:18	Yes	1	1		1974	4	2	1		4	2452	1	6	1		5	1	0	0	0	0	0
Smoke-Free Recovery	17	72320	1146	5578c4c9-7590-4304-820e-7c9886948896		11/06/2015	09:14:18	Yes	1	2		1963	4	1	1		4	2305	2	4	2		2	0	0	0	0	1	0
Smoke-Free Recovery	17	72327	1147	5578ca08-4c34-4fcd-834b-39f486948896		11/06/2015	09:36:41	Yes	1	1		1971	4	1	1		4	2321	1	3	1		2	0	0	0	0	0	1
Smoke-Free Recovery	17	72329	1148	5578cab2-a630-4200-8565-02b286948896		11/06/2015	09:39:31	No	1	1		1996	1	1	1		4	1996	4	5	1		3	0	1	0	0	0	0	1		15	14	2	120	2
Smoke-Free Recovery	17	73074	1149	557a3acd-49a0-46e5-a45c-08ce86948896		12/06/2015	11:50:06	No	1	2		1951	4	2	1		4	2285	1	4	1		5	1	0	0	0	0	0
Smoke-Free Recovery	17	73076	1150	557a3d11-8014-43b7-99ad-730e86948896		12/06/2015	11:59:46	No	1	2		1947	4	2	1		4	2315	1	3	2		4	0	0	0	0	1	0
Smoke-Free Recovery	17	73082	1151	557a40e7-0c80-4e75-9d0a-08ce86948896		12/06/2015	12:16:09	No	1	1		1953	4	2	1		4	2431	4	3	2		2	0	0	0	0	1	0
Smoke-Free Recovery	17	75923	1152	557fa76a-626c-4906-b267-168786948896		16/06/2015	14:34:51	No	1	2		1951	4	2	1		4	2285	1	4	1		5	0	1	0	0	0	0
Smoke-Free Recovery	17	75929	1153	557fab5b-c280-4aa7-8c26-3ae086948896		16/06/2015	14:51:40	No	1	2		1947	4	2	1		4	2315	1	4	3		4	1	0	0	0	0	0
Smoke-Free Recovery	17	75935	1154	557fb06b-e0b0-4d84-bbd3-68fc86948896		16/06/2015	15:13:16	No	1	1		1987	4	2	1		1	4868	4	5	1		4	0	1	0	0	0	0
Smoke-Free Recovery	17	77263	1155	558245b8-2408-4582-a29b-055786948896		18/06/2015	14:14:49	No	1	1		1947	4	2	1		4	2291	1	4	2		4	1	0	0	0	0	0
Smoke-Free Recovery	17	77265	1156	5582461c-5cc0-460d-9b25-3d8486948896		18/06/2015	14:16:29	No	1	2		1947	4	2	1		4	2281	1	3	1		5	1	0	0	0	0	0
Smoke-Free Recovery	17	77275	1157	5582491a-2f8c-43c9-a581-75a486948896		18/06/2015	14:29:15	No	1	2		1957	4	2	1		4	2291	1	4	2		4	1	0	0	0	0	0
Smoke-Free Recovery	17	77280	1158	55824b8f-f600-4ebd-9a29-055786948896		18/06/2015	14:39:45	No	1	2		1942	4	2	1		4	2305	5	3	2		2	0	0	0	0	1	0
Smoke-Free Recovery	17	77283	1159	55824ded-1704-4179-9027-75a486948896		18/06/2015	14:49:51	No	1	2		1949	4	2	1		4	2283	1	3	2		3	0	0	0	0	1	0
Smoke-Free Recovery	17	77392	1161	558366d3-a670-4fe0-98c1-055786948896		19/06/2015	10:48:20	Yes	1	1		1991	4	1	2	South Africa	4	2334	4	5	1		3	0	0	0	0	0	1
Smoke-Free Recovery	17	77393	1162	558366d7-6c9c-4d54-a63c-5a6d86948896		19/06/2015	10:48:24	No	1	1		1967	1	1	1		4	2285	1	5	1		4	0	0	0	0	0	1	1		25	19	2	150	1	1	5-Aug-14	2	10=Telephone support (like Quitline)|1=Own will-power, no help|6=Self-help book or brochure|9=Internet support|3=A stop-smoking medication prescribed by a doctor called Varenicline or Champix|11=Going to see a GP|8=Group counselling|2=Stop-smoking medication prescribed by a doctor called Zyban, Prexaton or Bupropion|5=Nicotine Replacement Therapy (NRT) (gum, patches, inhaler, lozenge, spray) brou…	0	1	0	0	0	0	0	0	0
Smoke-Free Recovery	17	77396	1060	553d86f6-01a0-49f0-93f0-26d586948896		19/06/2015	11:43:18	No	1	2		1945	4	1	1		4	2285	3	4	2
Smoke-Free Recovery	17	77419	1163	55860111-6808-43cd-a86a-229e86948896		21/06/2015	10:10:57	Yes	1	2		1993	4	2	1		4	2420	4	4	1		2	1	0	0	0	0	0
Smoke-Free Recovery	17	77420	1164	5586021e-749c-4183-b9d9-229a86948896		21/06/2015	10:15:27	No	1	1		1992	4	2	1		4	2289	4	5	1		6	1	0	0	0	0	0
Smoke-Free Recovery	17	77421	1165	55860426-6cbc-48fb-a2c9-229c86948896		21/06/2015	10:24:06	No	1	2		1960	2	1	1		4	2317	2	3	1		2	0	0	1	0	0	0	1		3	20	0	22	2
Smoke-Free Recovery	17	77422	1166	55860eab-d6ec-49c3-865c-2af686948896		21/06/2015	11:09:00	No	1	1		1939	4	1	1		4	2304	5	5	2		2	0	0	0	0	1	0
Smoke-Free Recovery	17	77436	1167	558766da-cf50-472c-950e-2afb86948896		22/06/2015	11:37:32	No	1	1		1942	1	1	2	Scotland	4	2318	3	5	2		2	0	0	0	0	1	0	1		10	12	2	60	2
Smoke-Free Recovery	17	77438	1168	55877360-8020-4acb-9eeb-22a086948896		22/06/2015	12:30:57	No	1	2		1945	4	2	1		4	2287	5	4	2		2	0	0	0	0	1	0
Smoke-Free Recovery	17	77440	1169	558775b8-f2c8-4128-9f47-229b86948896		22/06/2015	12:40:57	No	1	2		1943	4	2	1		4	2315	2	3	2		2	0	0	0	0	1	0
Smoke-Free Recovery	17	77453	1170	55888f71-52a8-4834-983b-347686948896		23/06/2015	08:42:59	No	1	2		1941	4	2	1		4	2299	3	6	2		2	0	0	0	0	1	0
Smoke-Free Recovery	17	77454	1171	55889282-08a0-4e27-a65b-347686948896		23/06/2015	08:56:03	Yes	1	1		1987	4	2	1		4	4868	2	5	1		5	1	0	0	0	0	0
Smoke-Free Recovery	17	77455	1172	558893c3-bdf0-414e-bce0-347586948896		23/06/2015	09:01:23	Yes	1	1		1974	4	2	1		4	2318	1	5	1		5	1	0	0	0	0	0
Smoke-Free Recovery	17	77474	1173	558b3c13-e428-45a8-b50b-4bdd86948896		25/06/2015	09:24:05	No	1	1		1963	1	1	2	Scotland	4	2289	4	5	2		2	0	0	0	0	1	0	1		30	15	2	100	1	0	1-Apr-14	7	5=Nicotine Replacement Therapy (NRT) (gum, patches, inhaler, lozenge, spray) brought without a prescription (e.g. from the supermarket or chemist)|7=Alternative therapies such as herbal or natural remedies, hypnosis, relaxation or accupuncture|2=Stop-smoking medication prescribed by a doctor called Zyban, Prexaton or Bupropion|4=Nicotine Replacement Therapy (NRT) (gum, patches, inhaler, lozenge, …	1	0	0	0	0	0	0	0	0
Smoke-Free Recovery	17	77477	1174	558b45ca-b708-433a-9c58-7eee86948896		25/06/2015	10:05:31	No	1	2		1990	4	1	1		4	2299	4	3	2		1	0	0	0	0	1	0
Smoke-Free Recovery	17	77478	1175	558b46cc-7974-44b8-a077-7e4386948896		25/06/2015	10:09:49	No	1	1		1955	4	1	2	California	4	1955	1	6	4		6	1	0	0	0	0	0
Smoke-Free Recovery	17	77479	1176	558b48ee-e8ec-4006-8d52-7be486948896		25/06/2015	10:18:56	No	1	2		1990	3	3	1		4	2446	4	3	2		1	0	0	0	0	1	0
Smoke-Free Recovery	17	77491	1177	558de70b-12fc-4218-b174-594f86948896		27/06/2015	09:58:04	No	1	1		1949	4	1	1		4	2370	1	5	1		4	1	0	0	0	0	0
Smoke-Free Recovery	17	77492	1178	558de969-9ce0-4e38-b6c1-62b686948896		27/06/2015	10:08:10	No	1	2		1964	4	2	1		4	2280	3	5	2		2	0	0	0	0	1	0
Smoke-Free Recovery	17	77501	1179	558f8682-3ee8-4b0a-9900-2d6586948896		28/06/2015	15:30:43	No	1	2		1941	4	1	1		4	2315	5	6	2		2	0	0	0	0	1	0
Smoke-Free Recovery	17	77502	1180	558f88c9-10e4-4eb6-8fa4-2d6386948896		28/06/2015	15:40:26	No	1	1		1995	1	1	1		4	2316	4	5	1		3	0	0	0	0	1	0	1		8	16	1	70	1	1	1-Jun-14	60	8=Group counselling|11=Going to see a GP|5=Nicotine Replacement Therapy (NRT) (gum, patches, inhaler, lozenge, spray) brought without a prescription (e.g. from the supermarket or chemist)|9=Internet support|4=Nicotine Replacement Therapy (NRT) (gum, patches, inhaler, lozenge, spray) recommended by a doctor|1=Own will-power, no help|3=A stop-smoking medication prescribed by a doctor called Varenic…	1	0	0	0	0	0	0	0	0
Smoke-Free Recovery	17	77504	1181	558f8a76-1608-49fe-947e-2d6386948896		28/06/2015	15:47:35	No	1	2		1943	4	2	1		4	2280	1	5	4		4	1	0	0	0	0	0
Smoke-Free Recovery	17	77505	1182	558f8c15-ed58-44b9-b50a-104286948896		28/06/2015	15:54:30	Yes	1	2		1953	4	2	1		4	2291	1	6	4		6	1	0	0	0	0	0
Smoke-Free Recovery	17	77506	1183	558f9071-b18c-4d28-9869-2d6686948896		28/06/2015	16:13:06	No	1	1		1949	4	1	1		4	2280	1	5	1		5	1	0	0	0	0	0
Smoke-Free Recovery	17	77515	1184	559087ab-42d8-4471-988a-104286948896		29/06/2015	09:47:56	No	1	1		1988	1	1	1		4	2287	2	5	1		6	0	0	0	0	0	1	2		10	16	2	30	1	0	22-Jun-13	5	6=Self-help book or brochure|7=Alternative therapies such as herbal or natural remedies, hypnosis, relaxation or accupuncture|1=Own will-power, no help|5=Nicotine Replacement Therapy (NRT) (gum, patches, inhaler, lozenge, spray) brought without a prescription (e.g. from the supermarket or chemist)|10=Telephone support (like Quitline)|11=Going to see a GP|8=Group counselling|9=Internet support|4=N…	1	0	0	0	0	0	0	0	0
Smoke-Free Recovery	17	77516	1185	5590880f-e6d4-438f-9222-2d6286948896		29/06/2015	09:49:36	No	1	2		1959	1	1	1		4	2295	1	4	1		2	0	0	0	0	0	1	1		20	11	1	85	1	2	14-Apr-15
Smoke-Free Recovery	17	77518	1086	554ff002-2d9c-45cb-99c6-6f2186948896		29/06/2015	10:12:48	No	1
Smoke-Free Recovery	17	77519	1186	55908d8f-c238-4262-8068-104086948896		29/06/2015	10:13:05	No	1	1		1982	4	2	1		4	2321	4	4	1		4	1	0	0	0	0	0
Smoke-Free Recovery	17	77520	1187	5590906e-a0e8-4a62-a1f5-103e86948896		29/06/2015	10:25:19	No	1	1		1986	1	1	1		4	2324	1	5	1		3	1	0	0	0	0	0	1		20	18	2	125	1	2	16-Mar-15	5	11=Going to see a GP|10=Telephone support (like Quitline)|4=Nicotine Replacement Therapy (NRT) (gum, patches, inhaler, lozenge, spray) recommended by a doctor|3=A stop-smoking medication prescribed by a doctor called Varenicline or Champix|5=Nicotine Replacement Therapy (NRT) (gum, patches, inhaler, lozenge, spray) brought without a prescription (e.g. from the supermarket or chemist)|9=Internet s…	0	0	0	1	0	0	0	0	0
Smoke-Free Recovery	17	77523	1188	5590972c-27ac-4933-88e4-2d6786948896		29/06/2015	10:54:05	No	1	2		1941	4	1	2	England	4	2259	3	3	2		2	0	0	0	0	1	0
Smoke-Free Recovery	17	77536	1189	55922252-aa60-4e4f-b3de-2c8886948896		30/06/2015	15:00:03	No	1	2		1954	4	1	1		1	2290	5	5	2		2	0	0	0	0	1	0
Smoke-Free Recovery	17	77538	1190	5592255c-2990-4869-8708-11c586948896		30/06/2015	15:13:01	No	1	1		1949	4	2	1		4	4305	1	5	1		5	1	0	0	0	0	0
Smoke-Free Recovery	17	77555	1191	55945f6d-96b8-4244-9526-2cf786948896		2/07/2015	07:45:18	No	1	1		1974	4	2	1		4	2324	1	5	1		5	0	0	0	0	0	1
Smoke-Free Recovery	17	77556	1192	5594611c-9488-412d-83ec-2cf486948896		2/07/2015	07:52:29	No	1	1		1971	2	1	2	fiji	2	2300	1	5	1		6	0	0	0	0	0	1	1		15	16	0	30	2
Smoke-Free Recovery	17	77562	1193	5594c863-e9f0-4bbc-a91b-0f4e86948896		2/07/2015	15:13:09	No	1	1		1989	4	2	1		4	2769	4	6	1		5	0	0	0	0	0	1
Smoke-Free Recovery	17	77564	1194	5594ca44-a010-43ce-a3b7-2cfc86948896		2/07/2015	15:21:09	No	1	2		1943	4	2	1		4	2318	1	5	1		4	1	0	0	0	0	0
Smoke-Free Recovery	17	77566	1195	5594cc71-a1ec-4f96-b6a6-2cfe86948896		2/07/2015	15:30:26	No	1	1		1995	4	2	1		4	2287	4	5	1		4	0	0	0	0	0	1
Smoke-Free Recovery	17	77597	1196	5595f5fd-7ab4-48b1-a1db-2cfb86948896		3/07/2015	12:39:58	No	1	2		1938	4	2	1		4	2287	1	4	2		3	0	0	0	0	1	0
Smoke-Free Recovery	17	77598	1197	5595fb4d-7700-47fb-a405-2cf786948896		3/07/2015	13:02:38	Yes	1	2		1981	4	2	1		4	2285	1	5	1		5	1	0	0	0	0	0
Smoke-Free Recovery	17	77618	1198	5599bbcd-dac4-4eb0-8b95-01b486948896		6/07/2015	09:20:46	No	1	1		1985	2	1	1		4	2877	4	6	1		3	0	0	0	0	0	1	2		0	14	0	20	1	2	10-Jul-14	100	6=Self-help book or brochure|8=Group counselling|4=Nicotine Replacement Therapy (NRT) (gum, patches, inhaler, lozenge, spray) recommended by a doctor|5=Nicotine Replacement Therapy (NRT) (gum, patches, inhaler, lozenge, spray) brought without a prescription (e.g. from the supermarket or chemist)|7=Alternative therapies such as herbal or natural remedies, hypnosis, relaxation or accupuncture|3=A s…	1	0	0	0	0	0	0	0	0
Smoke-Free Recovery	17	77619	1199	5599bcaf-d288-4cb2-ae88-1b7e86948896		6/07/2015	09:24:32	Yes	1	1		1967	4	2	1		4	2283	1	6	1		5	0	1	0	0	0	0
Smoke-Free Recovery	17	77620	1200	5599c279-1194-4083-8539-01b186948896		6/07/2015	09:49:14	No	1	2		1953	4	2	2	England	4	2430	1	5	2		5	0	0	0	0	1	0
Smoke-Free Recovery	17	77621	1201	5599c54b-7624-4f7c-b4b4-1b7e86948896		6/07/2015	10:01:16	No	1	1		1995	3	1	1		4	2283	2	4	1		2	1	0	0	0	0	0	1		1	17	0	20	1	2	31-Jul-15	30	9=Internet support|2=Stop-smoking medication prescribed by a doctor called Zyban, Prexaton or Bupropion|7=Alternative therapies such as herbal or natural remedies, hypnosis, relaxation or accupuncture|5=Nicotine Replacement Therapy (NRT) (gum, patches, inhaler, lozenge, spray) brought without a prescription (e.g. from the supermarket or chemist)|8=Group counselling|6=Self-help book or brochure|1=…	1	0	0	0	0	0	0	0	0
Smoke-Free Recovery	17	77623	1202	5599cdbe-1e68-407c-850d-1b8086948896		6/07/2015	10:37:20	No	1	2		1943	4	2	1		4	2290	1	4	2		4	1	0	0	0	0	0
Smoke-Free Recovery	17	77624	1203	5599cf21-9bd4-4bf7-a163-1b7a86948896		6/07/2015	10:43:14	No	1	2		1940	1	1	1		4	2280	1	3	1		6	1	0	0	0	0	0	1		25	18	0	80	1	0	11-Jul-95	3	9=Internet support|10=Telephone support (like Quitline)|3=A stop-smoking medication prescribed by a doctor called Varenicline or Champix|11=Going to see a GP|2=Stop-smoking medication prescribed by a doctor called Zyban, Prexaton or Bupropion|1=Own will-power, no help|8=Group counselling|4=Nicotine Replacement Therapy (NRT) (gum, patches, inhaler, lozenge, spray) recommended by a doctor|5=Nicotin…	0	1	0	0	0	0	0	0	0
Smoke-Free Recovery	17	77625	1204	5599d3a2-8e48-448e-8163-01b286948896		6/07/2015	11:02:28	No	1	2		1953	4	1	1		4	2291	1	5	2		1	0	0	0	0	1	0
Smoke-Free Recovery	17	77627	1205	5599dac0-2dc4-417b-abcb-01b486948896		6/07/2015	11:32:50	No	1	2		1957	1	1	1		4	2282	3	3	2		2	0	0	0	0	1	0	1		15	14	3	120	1	1	21-Mar-11	1	1=Own will-power, no help|11=Going to see a GP|10=Telephone support (like Quitline)|3=A stop-smoking medication prescribed by a doctor called Varenicline or Champix|8=Group counselling|7=Alternative therapies such as herbal or natural remedies, hypnosis, relaxation or accupuncture|4=Nicotine Replacement Therapy (NRT) (gum, patches, inhaler, lozenge, spray) recommended by a doctor|5=Nicotine Repla…	1	0	0	0	0	0	0	0	0
Smoke-Free Recovery	17	77637	1206	559b1774-2d58-489e-9867-02e386948896		7/07/2015	10:04:04	No	1	2		1953	4	2	2	England	4	2430	1	6	2		6	1	0	0	0	0	0
Smoke-Free Recovery	17	77682	1207	55a04146-5cf8-4dea-9be5-34a386948896		11/07/2015	08:03:51	No	1	2		1945	4	1	1		4	2304	2	5	2		2	0	0	0	0	1	0
Smoke-Free Recovery	17	77683	1208	55a041c8-5d98-48de-bfb3-34a386948896		11/07/2015	08:06:01	Yes	1	1		1993	3	2	1		4	2304	4	4	1		3	0	0	0	0	0	1
Smoke-Free Recovery	17	77684	1209	55a0441d-f81c-4261-a7e5-34a386948896		11/07/2015	08:15:58	Yes	1	1		1987	4	2	1		1	2285	2	3	1		3	0	0	0	0	0	1
Smoke-Free Recovery	17	77685	1210	55a0462c-6138-47a6-a114-606486948896		11/07/2015	08:24:45	No	1	1		1953
Smoke-Free Recovery	17	77689	1211	55a1b337-1e74-4ed3-9bf0-04c886948896		12/07/2015	10:22:16	Yes	1	1		1981	4	2	1		4	2284	1	4	1		4	1	0	0	0	0	0
Smoke-Free Recovery	17	77690	1212	55a1b3dd-e9e4-45e3-8cc5-04c586948896		12/07/2015	10:25:02	No	1	1		1993	4	2	1		4	2319	4	6	1		3	0	0	1	0	0	0
Smoke-Free Recovery	17	77691	1213	55a1b56d-f92c-4135-a487-04c486948896		12/07/2015	10:31:42	No	1	2		1965	4	2	1		4	2290	1	5	3		4	0	0	1	0	0	0
Smoke-Free Recovery	17	77692	1214	55a1b865-5c24-4a64-a53e-04c586948896		12/07/2015	10:44:23	No	1	1		1975	4	2	1		4	2298	1	6	3		1	0	1	0	0	0	0
Smoke-Free Recovery	17	77693	1215	55a1b91c-02e8-4494-8fc2-04c586948896		12/07/2015	10:47:25	No	1	2		1948	4	2	1		4	2262	3	3	2		2	0	0	0	0	1	0
Smoke-Free Recovery	17	77694	1210	55a1bc35-30c0-4ff9-ab89-04c686948896		12/07/2015	11:00:38	No	1	1		1993	4	2	1		4	2259	2	3	1		3	1	0	0	0	0	0
Smoke-Free Recovery	17	77695	1216	55a1be83-6ec4-494c-8fb6-04c286948896		12/07/2015	11:10:28	No	1	2		1956	4	1	1		4	2304	3	3	2		2	0	0	0	0	1	0
Smoke-Free Recovery	HBS V1	77705	1001	550f5cca-c9ac-4d2e-b777-7ee986948896		13/07/2015	09:52:46	Yes		1	14-Dec-88		4	1	1		4	2300	4	5	2		1	0	0	1	0	0	0
Smoke-Free Recovery	HBS V1	77706	sam2	55a2fe0a-c0f8-4f7c-8091-047186948896		13/07/2015	09:55:34	No	1
Smoke-Free Recovery	HBS V1	77708	1002	55123465-6da0-484d-94d5-2e1286948896		13/07/2015	10:03:00	No	1	1	21-Sep-15		1	1	1		4	2284	4	3	1		1	1	0	0	0	0	0	1		10	16	2	60	2
Smoke-Free Recovery	HBS V1	77710	1003	551c6eb9-f540-4ddc-b28f-611d86948896		13/07/2015	10:13:28	Yes		1	2-Jan-91		4	2	1		4	2300	4	6	1		3	0	0	1	0	0	0
Smoke-Free Recovery	HBS V1	77717	1004	551c7466-5834-4e86-8ba0-612386948896		13/07/2015	10:39:38	No		1	3-Nov-95		1	1	1		4	2298	4	4	2		1	0	0	0	0	1	0	1		30	10	3	16	1	0	8-May-14	30	2=Stop-smoking medication prescribed by a doctor called Zyban, Prexaton or Bupropion|11=Going to see a GP|7=Alternative therapies such as herbal or natural remedies, hypnosis, relaxation or accupuncture|5=Nicotine Replacement Therapy (NRT) (gum, patches, inhaler, lozenge, spray) brought without a prescription (e.g. from the supermarket or chemist)|9=Internet support|8=Group counselling|3=A stop-s…	0	0	0	0	1	0	0	0	0
Smoke-Free Recovery	HBS V1	77726	1005	551c7647-7c90-4bf6-b5c1-262886948896		13/07/2015	12:01:52	Yes		1	10-Mar-78		4	2	1		4	2263	2	5	1		5	1	0	0	0	0	0
Smoke-Free Recovery	HBS V1	77729	1006	551c8a91-e0fc-4dbe-8373-612386948896		13/07/2015	12:11:06	Yes	1	1	17-Nov-90		4	2	1		4	2304	4	5	1		3	1	0	0	0	0	0
Smoke-Free Recovery	HBS V1	77767	sam02	54f902bd-4378-48ac-bc25-5e4186948896		15/07/2015	10:22:33	No	2	2	2-Feb-15		1	1	1		4	0	4	6	1		2	0	0	0	0	0	1	1		22	16	2	12	2
Smoke-Free Recovery	HBS V1	77768	Male	55a5aa0e-47fc-4f3c-972f-069686948896		15/07/2015	10:32:18	No	2	1	15-Jul-15		2	1	1		4	0	5	5	1		1	0	0	0	1	0	0	2		9	10	1	45	2
Smoke-Free Recovery	HBS V1	77771	1010	55233c52-c4c4-4ece-9524-0db986948896		15/07/2015	12:22:01	Yes		1	22-Aug-83		4	2	1		4	0	2	5	1		6	1	0	0	0	0	0
Smoke-Free Recovery	HBS V1	77774	1007	55232bea-a0e8-42c0-9052-5f7386948896		15/07/2015	14:29:57	No		1	3-Mar-73		4	1	1		1	2326	2	5	1
Smoke-Free Recovery	HBS V1	77797	test	53a0cd89-9314-44a3-8c17-171886948896		16/07/2015	07:23:35	No		2
Smoke-Free Recovery	HBS V1	77798	test2	545aa7dc-f7f0-46ef-b3be-55d186948896		16/07/2015	07:24:52	No	1	2
Smoke-Free Recovery	HBS V1	77799	test3	545aaa62-98f8-404a-a510-55cd86948896		16/07/2015	07:29:14	No	1	2	8-Jul-15
Smoke-Free Recovery	HBS V1	77806	1008	55233273-7130-4a91-961c-7efb86948896		16/07/2015	13:15:11	No	1	1	30-Apr-56		4	1	1		4	2290	4	5	1		6	1	0	0	0	0	0
Smoke-Free Recovery	HBS V1	77808	1009	55233887-7514-402f-a832-7efc86948896		16/07/2015	13:34:04	No	1	1
Smoke-Free Recovery	HBS V1	77811	1011	552344ec-66c4-40e3-a5f6-0f4686948896		16/07/2015	13:48:30	No	1	1	31-May-91		4	2	1		4	2335	4	5	1		6	0	0	0	0	0	1
Smoke-Free Recovery	HBS V1	77826	1012	552347a2-0ee0-4d2b-adc5-444286948896		17/07/2015	10:04:20	No	1	1	21-May-65		4	2	1		4	2448	2	5	1		6	0	0	0	0	0	1
Smoke-Free Recovery	HBS V2	77907	1013	5523546b-7804-4b42-bcaf-7efa86948896		20/07/2015	10:08:31	Yes	1	1	23-May-89		4	2	1		4	2291	4	5	1		4	0	0	0	0	0	1
Smoke-Free Recovery	HBS V2	77909	1014	55235469-ae58-4d5d-8d2d-7efb86948896		20/07/2015	10:17:17	No	1	2	22-Nov-40		4	2	1		4	2295	2	3	2		2	0	0	0	0	1	0
Smoke-Free Recovery	HBS V2	77911	1015	55235881-d2fc-4ea8-a791-7ef786948896		20/07/2015	10:37:19	No	1	2	2-Feb-45		4	1	2	Scotland	4	2283	1	5	2		3	0	0	1	0	0	0
Smoke-Free Recovery	HBS V2	77914	1016	552482f5-c0f4-4bbb-9fa2-0db986948896		20/07/2015	10:57:34	No	1	1	14-Nov-84		4	1	1		4	2289	1	5	1		5	1	0	0	0	0	0	1		0	21	0	0	1	1	15-Apr-15
Smoke-Free Recovery	HBS V2	77916	1018	5525b189-2b74-4047-bac9-4f8686948896		20/07/2015	11:23:54	No	1	1	20-Mar-61		1	1	2	Spain	4	2289	4	3	2		2	0	0	0	0	1	0	1		25	21	2	82	2
Smoke-Free Recovery	HBSV5 (EQ5D)	78235	1052	55345877-472c-4ea8-9f12-2ecd86948896		13/08/2015	11:01:45	Yes	1	1	11-Nov-56		4	2	1		4	2291	3	5	2		2	0	0	0	0	1	0
Smoke-Free Recovery	HBSV5 (EQ5D)	78251	1053	553475dc-594c-41ab-a78f-2ed286948896		13/08/2015	14:05:22	Yes	1	1	22-Jun-94		4	2	1		4	2284	4	4	1		5	1	0	0	0	0	0
Smoke-Free Recovery	HBSV5 (EQ5D)	78292	1054	55358d65-8054-4dc2-8bd1-2ed086948896		14/08/2015	09:58:51	Yes	1	2	2-Mar-53		4	1	1		4	2264	4	3	1		2	1	0	0	0	0	0
Smoke-Free Recovery	HBSV5 (EQ5D)	78295	1055	55359375-0f84-4dc4-972b-60ce86948896		14/08/2015	11:01:37	No	1	1	16-Apr-70		4	1	1		4	2122	4	5	2		2	0	0	0	0	1	0
Smoke-Free Recovery	HBSV5 (EQ5D)	78296	1056	55386274-d8dc-451f-ab0b-680a86948896		14/08/2015	11:19:41	No	1	2	13-Apr-15		4	1	1		1	2441	1	3	1		6	0	0	0	0	0	1
Smoke-Free Recovery	HBSV5 (EQ5D)	78302	1057	55386a2c-1810-4193-96b5-7ebc86948896		14/08/2015	12:03:28	No	1	2	30-Sep-42		4	2	1		4	2278	3	3	2		2	0	0	0	0	1	0
Smoke-Free Recovery	HBSV5 (EQ5D)	78322	1058	55388836-52cc-4fc4-9ea1-6ea986948896		14/08/2015	12:26:09	Yes	1	1	28-Dec-75		4	2	2	Ireland	4	4213	1	5	1		4	0	0	0	0	0	1
Smoke-Free Recovery	HBSV5 (EQ5D)	78345	1059	553d84fe-a9a8-4823-a533-6b2f86948896		15/08/2015	10:42:17	No	1	1	19-Nov-77		1	1	1		4	2450	2	1	1		3	0	0	0	0	0	1	1		30	13	2	100	1	2	2-Feb-15	1	1=Own will-power, no help|3=A stop-smoking medication prescribed by a doctor called Varenicline or Champix|6=Self-help book or brochure|5=Nicotine Replacement Therapy (NRT) (gum, patches, inhaler, lozenge, spray) brought without a prescription (e.g. from the supermarket or chemist)|4=Nicotine Replacement Therapy (NRT) (gum, patches, inhaler, lozenge, spray) recommended by a doctor|7=Alternative t…	1	0	0	0	0	0	0	0	0
Smoke-Free Recovery	HBSV5 (EQ5D)	78347	1060	553d86f6-01a0-49f0-93f0-26d586948896		15/08/2015	10:55:49	No	1	1	31-Jan-77		1	1	1		4	2290	2	5	1		2	0	0	0	0	1	0	1		20	14	2	70	1	0	1-Jan-05	7	9=Internet support|2=Stop-smoking medication prescribed by a doctor called Zyban, Prexaton or Bupropion|7=Alternative therapies such as herbal or natural remedies, hypnosis, relaxation or accupuncture|6=Self-help book or brochure|1=Own will-power, no help|4=Nicotine Replacement Therapy (NRT) (gum, patches, inhaler, lozenge, spray) recommended by a doctor|8=Group counselling|5=Nicotine Replacement…	0	0	0	0	1	0	0	0	0
Smoke-Free Recovery	HBSV5 (EQ5D)	78350	1061	553d9676-99d8-4ec5-b73f-324d86948896		15/08/2015	11:37:49	No	1	1	24-Jan-49		4	1	1		4	2430	2	5	2		2	1	0	0	0	0	0
Smoke-Free Recovery	HBSV5 (EQ5D)	78355	1062	553ebeeb-a73c-414e-b4dc-213586948896		15/08/2015	12:49:01	No	1	1	27-Apr-54		1	1	1		4	2278	4	3	2		2	0	0	0	0	1	0	2		20	15	3	150	2
Smoke-Free Recovery	HBSV5 (EQ5D)	78381	1063	55403ba4-309c-4322-9d12-36aa86948896		16/08/2015	10:49:31	No	1	1	21-Feb-87		2	1	1		4	2291	4	6	1		3	1	0	0	0	0	0	2		2	16	0	25	1	1	16-Aug-15	14	9=Internet support|11=Going to see a GP|4=Nicotine Replacement Therapy (NRT) (gum, patches, inhaler, lozenge, spray) recommended by a doctor|7=Alternative therapies such as herbal or natural remedies, hypnosis, relaxation or accupuncture|6=Self-help book or brochure|5=Nicotine Replacement Therapy (NRT) (gum, patches, inhaler, lozenge, spray) brought without a prescription (e.g. from the supermark…	1	0	0	0	0	0	0	0	0
Smoke-Free Recovery	HBSV5 (EQ5D)	78416	1065	554162ee-a030-4820-a8e3-346986948896		17/08/2015	09:19:34	Yes	1	1	7-Jul-86		4	1	1		4	2290	2	5	1		4	1	0	0	0	0	0
Smoke-Free Recovery	HBSV5 (EQ5D)	78417	1064	55403fb5-ac68-4ab3-8e6b-39c386948896		17/08/2015	09:20:25	No	1	2	22-May-64		1	1	1		4	2325	4	3	2		2	0	0	0	0	1	0	2		7	12	3	80	2
Smoke-Free Recovery	HBSV5 (EQ5D)	78421	1066	55416b01-0e24-4881-bdc6-35e486948896		17/08/2015	09:48:00	Yes	1	1	28-Jun-95		4	2	1		4	2287	4	4	1		1	0	0	1	0	0	0
Smoke-Free Recovery	HBSV5 (EQ5D)	78422	1067	55416efc-d610-4d91-b7d8-1c1c86948896		17/08/2015	09:58:50	Yes	1	1	15-Apr-92		4	2	1		4	2261	4	5	1		3	1	0	0	0	0	0
Smoke-Free Recovery	HBSV5 (EQ5D)	78423	1068	5542bb37-5d88-41f3-a534-7dba86948896		17/08/2015	10:13:50	Yes	1	1	19-Sep-96		4	2	1		3	0	2	4	3		6	0	0	0	0	0	1
Smoke-Free Recovery	HBSV5 (EQ5D)	78425	1069	5546aaac-c8e0-4f5e-9110-7d3286948896		17/08/2015	10:31:49	Yes	1	2	23-Aug-71		4	2	1		4	2263	3	5	1		2	1	0	0	0	0	0
Smoke-Free Recovery	HBSV5 (EQ5D)	78432	1070	5546ac01-f1c8-4c29-aead-7d2f86948896		17/08/2015	13:53:48	No	1	2	17-Oct-40		4	2	2	New Zealand	4	2428	5	3	2		2	0	0	0	0	1	0
Smoke-Free Recovery	HBSV5 (EQ5D)	78435	1071	5546b7b9-85ec-40bf-8f29-4b3086948896		17/08/2015	14:15:51	No	1	2	23-Jan-47		4	2	1		4	4814	1	3	2		2	0	0	0	0	1	0
Smoke-Free Recovery	HBSV5 (EQ5D)	78506	1072	5546bb0e-d0f0-4a65-a97a-3f1586948896		19/08/2015	10:14:58	No	1	2	10-Aug-60		3	1	1		4	2312	2	5	1		2	0	0	0	0	0	1	1		10	14	2	120	1	1	31-Jul-15	24	10=Telephone support (like Quitline)|6=Self-help book or brochure|3=A stop-smoking medication prescribed by a doctor called Varenicline or Champix|8=Group counselling|4=Nicotine Replacement Therapy (NRT) (gum, patches, inhaler, lozenge, spray) recommended by a doctor|2=Stop-smoking medication prescribed by a doctor called Zyban, Prexaton or Bupropion|1=Own will-power, no help|9=Internet support|7…	1	0	0	0	0	0	0	0	0
Smoke-Free Recovery	HBSV5 (EQ5D)	78508	1073	5546ca31-4fe0-416e-9170-3f1586948896		19/08/2015	10:23:36	Yes	1	1	15-Dec-51		4	3	2	Birmingham england	4	2290	1	5	4		2	0	1	0	0	0	0
Smoke-Free Recovery	HBSV5 (EQ5D)	78513	1074	5546ce44-64dc-41ed-bb35-1d1f86948896		19/08/2015	12:02:45	No	1	1	20-Dec-57		4	1	1		4	2422	2	3	1		6	0	0	0	0	0	1
Smoke-Free Recovery	HBSV5 (EQ5D)	78514	1075	5547f3ee-a610-45d7-a229-0f2e86948896		19/08/2015	12:21:35	No	1	1	29-Nov-77		1	1	1		4	2428	4	6	2		6	0	0	0	0	1	0	2		15	19	3	50	1	3	9-Aug-11	132	1=Own will-power, no help|8=Group counselling|6=Self-help book or brochure|11=Going to see a GP|7=Alternative therapies such as herbal or natural remedies, hypnosis, relaxation or accupuncture|3=A stop-smoking medication prescribed by a doctor called Varenicline or Champix|10=Telephone support (like Quitline)|2=Stop-smoking medication prescribed by a doctor called Zyban, Prexaton or Bupropion|9=I…	0	0	0	0	0	0	0	0	0
Smoke-Free Recovery	HBSV5 (EQ5D)	78517	1076	5547fa05-5274-4853-b454-6bbf86948896		19/08/2015	12:51:27	No	1	1	18-Dec-15		1	1	1		4	2264	4	3	5	.	6	0	0	0	0	0	1	1		6	9	3	50	1	3	11-Apr-13	150	4=Nicotine Replacement Therapy (NRT) (gum, patches, inhaler, lozenge, spray) recommended by a doctor|6=Self-help book or brochure|5=Nicotine Replacement Therapy (NRT) (gum, patches, inhaler, lozenge, spray) brought without a prescription (e.g. from the supermarket or chemist)|3=A stop-smoking medication prescribed by a doctor called Varenicline or Champix|9=Internet support|8=Group counselling|1=…	0	0	0	0	0	0	0	0	0
Smoke-Free Recovery	HBSV5 (EQ5D)	78523	Sam	543c77f6-b9f0-4ddb-aaeb-285f86948896		19/08/2015	14:36:47	No		1	2-Oct-95		1	1	1		4	2296	4	4	1		1	1	0	0	0	0	0	1		10	15	3	60	1	3	1-Aug-15	3	7=Alternative therapies such as herbal or natural remedies, hypnosis, relaxation or accupuncture|4=Nicotine Replacement Therapy (NRT) (gum, patches, inhaler, lozenge, spray) recommended by a doctor|3=A stop-smoking medication prescribed by a doctor called Varenicline or Champix|1=Own will-power, no help|2=Stop-smoking medication prescribed by a doctor called Zyban, Prexaton or Bupropion|8=Group c…	0	0	0	0	0	0	0	0	0
Smoke-Free Recovery	HBSV5 (EQ5D)	78538	1049	55332db2-405c-45dd-b717-21b486948896		20/08/2015	09:16:17	No	1	1	2-Oct-95		1	1	1		4	2296	4	4	1		1	0	0	0	0	0	1	1		10	15	3	60	1	3	1-Aug-15	3	9=Internet support|11=Going to see a GP|2=Stop-smoking medication prescribed by a doctor called Zyban, Prexaton or Bupropion|1=Own will-power, no help|7=Alternative therapies such as herbal or natural remedies, hypnosis, relaxation or accupuncture|3=A stop-smoking medication prescribed by a doctor called Varenicline or Champix|8=Group counselling|10=Telephone support (like Quitline)|6=Self-help b…	0	0	0	0	0	0	0	0	0
Smoke-Free Recovery	HBSV5 (EQ5D)	78539	1048	553327c9-a18c-4e0c-a901-704b86948896		20/08/2015	09:16:41	No	1
Smoke-Free Recovery	HBSV5 (EQ5D)	78540	1038	552f17ac-cb6c-42c7-8c1a-4bf786948896		20/08/2015	09:17:58	No	1
Smoke-Free Recovery	HBSV5 (EQ5D)	78541	1001	550f5cca-c9ac-4d2e-b777-7ee986948896		20/08/2015	09:19:42	No	1
Smoke-Free Recovery	HBSV5 (EQ5D)	78544	lp01	55d51d29-4fa4-4cff-a2f0-545486948896		20/08/2015	10:19:54	No	2	2
Smoke-Free Recovery	HBSV5 (EQ5D)	78546	liverpool	55d52651-baac-4923-8cd6-5cc986948896		20/08/2015	10:58:58	No	2
Smoke-Free Recovery	HBSV5 (EQ5D)	78549	9999	55d52756-ba58-4844-abd8-545286948896		20/08/2015	11:05:59	No	2	1	11-Aug-15		1	1	1		1	0	1	3	3		3	0	1	0	0	0	0	6		12	12	3	333	2
Smoke-Free Recovery	HBSV5 (EQ5D)	78550	9998	55d5275f-20d0-4f67-8a5e-049586948896		20/08/2015	11:06:05	Yes	2	1	27-Aug-15		4	2	1		3	0	1	2	3		4	0	1	0	0	0	0
Smoke-Free Recovery	HBSV5 (EQ5D)	78556	2001	55d537fb-d98c-4f7b-9b36-544e86948896		20/08/2015	12:18:05	Yes	2	2	1-Nov-60		4	2	1		4	2234	1	6	1		4	1	0	0	0	0	0
Smoke-Free Recovery	HBSV5 (EQ5D)	78606	1077	554957f9-2798-4da7-886e-78da86948896		21/08/2015	15:02:58	No	1	1	11-Nov-60		4	2	1		4	2212	3	3	2		2	0	0	0	0	1	0
Smoke-Free Recovery	HBSV5 (EQ5D)	78612	1078	55495d8e-0374-4bea-a29a-4d0686948896		21/08/2015	15:20:54	No	1	1	17-Oct-41		4	2	2	England	4	2281	2	5	2		2	0	0	0	0	1	0
Smoke-Free Recovery	HBSV5 (EQ5D)	78615	1079	554c11a6-9388-4667-b547-7fe886948896		21/08/2015	15:39:22	No	1	1	11-Mar-66		4	2	1		4	2337	1	5	1		6	1	0	0	0	0	0
Smoke-Free Recovery	HBSV5 (EQ5D)	78640	1080	554fde76-4ee4-47a1-af8b-24bf86948896		22/08/2015	10:51:56	No	1	1	11-May-47		4	1	1		4	2281	5	3	2		2	0	0	0	0	1	0
Smoke-Free Recovery	HBSV5 (EQ5D)	78642	1081	554fdf6f-24c0-4f62-b02f-2de686948896		22/08/2015	11:11:58	No	1	1	8-Apr-71		1	1	1		4	2141	3	3	5	not saying	6	0	0	0	0	0	1	3		15	14	2	100	1	2	1-Jan-15	14	6=Self-help book or brochure|10=Telephone support (like Quitline)|2=Stop-smoking medication prescribed by a doctor called Zyban, Prexaton or Bupropion|8=Group counselling|4=Nicotine Replacement Therapy (NRT) (gum, patches, inhaler, lozenge, spray) recommended by a doctor|7=Alternative therapies such as herbal or natural remedies, hypnosis, relaxation or accupuncture|3=A stop-smoking medication pr…	0	0	1	0	0	0	0	0	0
Smoke-Free Recovery	HBSV5 (EQ5D)	78690	2002	55da4fcb-8878-4cbb-bd18-020686948896		24/08/2015	09:03:10	No	2	1	5-Aug-15		2	1	1		4	2170	2	5	1		2	0	0	0	0	0	1	2		20	16	3	40	1	1	17-Aug-15	7	8=Group counselling|11=Going to see a GP|6=Self-help book or brochure|3=A stop-smoking medication prescribed by a doctor called Varenicline or Champix|4=Nicotine Replacement Therapy (NRT) (gum, patches, inhaler, lozenge, spray) recommended by a doctor|10=Telephone support (like Quitline)|5=Nicotine Replacement Therapy (NRT) (gum, patches, inhaler, lozenge, spray) brought without a prescription (e…	0	0	0	0	0	0	0	0	0
Smoke-Free Recovery	HBSV5 (EQ5D)	78692	2003	55da56c5-9f68-44fc-97e8-74d486948896		24/08/2015	09:30:57	Yes	2	1	17-Feb-94		4	1	1		4	2570	4	3	1		6	0	0	0	0	0	1
Smoke-Free Recovery	HBSV5 (EQ5D)	78695	2004	55da5c8a-92bc-431a-8f24-56a686948896		24/08/2015	09:57:31	Yes	2	1	3-Aug-15		4	1	2	UK	4	2795	1	6	4		4	1	0	0	0	0	0
Smoke-Free Recovery	HBSV5 (EQ5D)	78737	99999	55dc45b1-c584-41e3-84bb-15f886948896		25/08/2015	20:38:42	No	1
Smoke-Free Recovery	HBSV5 (EQ5D)	78753	2007	55dd2320-3884-4324-8b00-134a86948896		26/08/2015	12:29:39	Yes	2	1	1-Jul-51		4	2	2	Iraq	4	2165	1	6	2		1	0	0	0	0	1	0
Smoke-Free Recovery	HBSV5 (EQ5D)	78763	1082	554fe4a8-76d8-4998-9319-6f1e86948896		27/08/2015	08:47:50	Yes	1	1	10-Nov-51		4	1	2	Sri Lanka	4	2324	2	4	1		1	0	0	0	0	0	1
Smoke-Free Recovery	HBSV5 (EQ5D)	78774	2008	55dfc922-0418-41ab-924d-5b0486948896		28/08/2015	12:42:57	Yes	2	1	7-Sep-70		4	2	2	Vietnam	4	2166	1	4	1		4	0	0	0	0	0	1
Smoke-Free Recovery	HBSV5 (EQ5D)	78777	2010	55dfd2b8-2bd8-4902-a109-48da86948896		28/08/2015	13:19:44	Yes	2	2	13-Feb-43		4	2	1		4	2556	1	2	2		2	0	0	0	0	1	0
Smoke-Free Recovery	HBSV5 (EQ5D)	78779	2011	55dfd9ea-f230-43b3-ad3b-326886948896		28/08/2015	13:50:19	Yes	2	2	2-May-94		4	2	1		4	2160	4	5	1		2	0	0	0	0	0	1
Smoke-Free Recovery	HBSV5 (EQ5D)	78783	1030	552c52e6-36fc-4651-a236-2bda86948896		31/08/2015	10:16:52	No	1	1	6-Nov-93		1	1	1		1	0	5	2	1		2	0	0	0	0	0	1	5		1	16	1	1	2	0
Smoke-Free Recovery	HBSV5 (EQ5D)	78785	2012	55e3cdd3-f418-40a8-bcdf-0f1386948896		31/08/2015	13:47:19	Yes	2	1	3-Mar-58		4	2	1		4	2575	3	5	1		5	0	0	0	0	0	1
Smoke-Free Recovery	HBSV5 (EQ5D)	78790	2013	55e4f2b6-9ce8-47af-bb65-064586948896		1/09/2015	10:39:22	Yes	2	1	30-Jan-54		4	2	2	Scotland	4	2745	2	6	1		2	0	0	0	0	0	1
Smoke-Free Recovery	HBSV5 (EQ5D)	78803	2014	55e63cff-fc30-4aab-bb44-167d86948896		2/09/2015	10:08:49	Yes	2	1	16-May-79		4	2	1		4	2748	4	5	5	Contractor	3	0	1	0	0	0	0
Smoke-Free Recovery	HBSV5 (EQ5D)	78809	1083	554fe5ca-e924-4418-9c68-113686948896		2/09/2015	13:26:47	No	1	1	9-Sep-15		1	1	1		4	2285	1	5	1		4	1	0	0	0	0	0	2		20	20	1	30	1	2	10-Mar-15	720	8=Group counselling|5=Nicotine Replacement Therapy (NRT) (gum, patches, inhaler, lozenge, spray) brought without a prescription (e.g. from the supermarket or chemist)|4=Nicotine Replacement Therapy (NRT) (gum, patches, inhaler, lozenge, spray) recommended by a doctor|3=A stop-smoking medication prescribed by a doctor called Varenicline or Champix|9=Internet support|7=Alternative therapies such as…	0	0	1	0	0	0	0	0	0
Smoke-Free Recovery	HBSV5 (EQ5D)	78811	1084	554feab5-dd30-4dd9-a340-120586948896		2/09/2015	13:43:02	No	1	2	10-Sep-42		4	2	1		4	2280	4	3	4		1	0	0	0	0	1	0
Smoke-Free Recovery	HBSV5 (EQ5D)	78823	1089	5551ae19-9998-4cb7-85d1-65bc86948896		4/09/2015	11:04:19	No	1	1	7-Jun-48		4	1	1		4	2295	1	6	2		6	1	0	0	0	0	0
Smoke-Free Recovery	HBSV5 (EQ5D)	78824	1090	55544670-0ce8-4a0a-90b7-319e86948896		4/09/2015	11:26:42	No	1	1	27-Jul-69		2	1	1		4	2283	1	5	1		3	0	0	0	0	0	1	1		5	13	0	0	1	2	27-Jul-15	5	7=Alternative therapies such as herbal or natural remedies, hypnosis, relaxation or accupuncture|8=Group counselling|3=A stop-smoking medication prescribed by a doctor called Varenicline or Champix|4=Nicotine Replacement Therapy (NRT) (gum, patches, inhaler, lozenge, spray) recommended by a doctor|5=Nicotine Replacement Therapy (NRT) (gum, patches, inhaler, lozenge, spray) brought without a presc…	1	0	0	0	0	0	0	0	0
Smoke-Free Recovery	HBSV5 (EQ5D)	78827	1091	55544c5c-eefc-4b86-b216-614d86948896		4/09/2015	11:53:02	Yes	1	1	15-Dec-93		4	2	1		4	2305	4	4	3		6	1	0	0	0	0	0
Smoke-Free Recovery	HBSV5 (EQ5D)	78829	2005	55dd12f0-1824-4fd9-985e-133b86948896		4/09/2015	12:49:24	No	2
Smoke-Free Recovery	HBSV5 (EQ5D)	78831	2016	55e907ca-40a4-4016-90aa-1c0886948896		4/09/2015	12:57:23	Yes	2	2	15-Jan-85		4	2	1		4	2567	1	5	3		2	1	0	0	0	0	0
Smoke-Free Recovery	HBSV5 (EQ5D)	78833	2017	55e90fe6-717c-4109-80be-7b1686948896		4/09/2015	13:32:10	No	2	1	31-May-79		1	1	2	Fiji	4	2170	4	5	1		2	0	0	0	0	0	1	1		10	19	3	100	1	6	30-Sep-15	2	9=Internet support|6=Self-help book or brochure|8=Group counselling|4=Nicotine Replacement Therapy (NRT) (gum, patches, inhaler, lozenge, spray) recommended by a doctor|7=Alternative therapies such as herbal or natural remedies, hypnosis, relaxation or accupuncture|2=Stop-smoking medication prescribed by a doctor called Zyban, Prexaton or Bupropion|1=Own will-power, no help|10=Telephone support (…	1	0	0	0	0	0	0	0	0
Smoke-Free Recovery	HBSV5 (EQ5D)	78836	1085	554fec08-5b68-491c-bef9-7dc386948896		6/09/2015	11:06:17	Yes	1	1	29-Jun-64		4	1	1		4	2287	1	5	5	Workers comp	6	1	0	0	0	0	0
Smoke-Free Recovery	HBSV5 (EQ5D)	78837	1086	554ff002-2d9c-45cb-99c6-6f2186948896		6/09/2015	11:11:06	No	1	2	23-Dec-56		4	1	1		4	2287	4	6	1		6	0	0	0	0	0	1
Smoke-Free Recovery	HBSV5 (EQ5D)	78838	1087	55500c11-54b8-4414-9899-325e86948896		6/09/2015	11:22:58	No	1	2	9-Apr-64		4	2	1		4	2287	4	6	1		5	1	0	0	0	0	0
Smoke-Free Recovery	HBSV5 (EQ5D)	78842	1088	5551a8d9-5448-463e-ba98-678986948896		6/09/2015	12:05:21	No	1	1	9-Jan-50		4	1	2	Holland	4	2768	1	3	1		6	0	0	0	0	0	1
Smoke-Free Recovery	HBSV5 (EQ5D)	78844	1092	55594776-b214-460b-99c0-125286948896		6/09/2015	13:08:58	Yes	1	2	7-Aug-80		4	1	2	Philippines	4	2323	1	5	1		5	0	1	0	0	0	0
Smoke-Free Recovery	HBSV5 (EQ5D)	78845	93	55ebb1b5-25ec-4916-ab0a-3ede86948896		6/09/2015	13:23:34	No	1
Smoke-Free Recovery	HBSV5 (EQ5D)	78846	1093	55594dff-53f4-4d01-86b6-125386948896		6/09/2015	13:23:54	No	1	2	19-Jan-71		4	1	1		4	2283	1	3	2		6	0	0	0	0	1	0
Smoke-Free Recovery	HBSV5 (EQ5D)	78849	1094	555a69ec-a2fc-4051-99de-046d86948896		7/09/2015	09:42:05	Yes	1	1	1-Apr-56		4	2	2	England	4	2280	1	4	1		5	1	0	0	0	0	0
Smoke-Free Recovery	HBSV5 (EQ5D)	78851	1095	555a6b4c-d314-4b65-a48b-0f7786948896		7/09/2015	10:00:52	No	1	1	30-Apr-37		4	2	1		4	2290	5	3	2		2	0	0	0	0	0	1
Smoke-Free Recovery	HBSV5 (EQ5D)	78853	1096	555a7177-4efc-46e3-abf3-086986948896		7/09/2015	10:30:39	No	1	2	12-Jan-40		4	2	1		4	2262	1	3	2		2	0	0	0	0	1	0
Smoke-Free Recovery	HBSV5 (EQ5D)	78855	1097	555a717e-5fe8-47ed-a7b3-086a86948896		7/09/2015	10:54:03	No	1	2	11-Jun-40		4	2	1		4	2305	5	3	2		2	0	0	0	0	1	0
Smoke-Free Recovery	HBSV5 (EQ5D)	78856	1098	555a78c9-be30-4cde-8a62-086f86948896		7/09/2015	11:12:04	No	1	2	20-Sep-47		4	2	1		4	2305	1	3	2		3	1	0	0	0	0	0
Smoke-Free Recovery	HBSV5 (EQ5D)	78860	1099	555a79c8-a85c-4d6f-ad77-0c5286948896		7/09/2015	11:49:35	No	1	1	6-May-60		4	2	1		4	2287	4	3	1		6	0	1	0	0	0	0
Smoke-Free Recovery	HBSV5 (EQ5D)	78863	2018	55ed022f-b2bc-40cb-9d31-254b86948896		7/09/2015	13:23:17	No	2	1	5-Dec-67		1	1	2	Greece	4	2759	1	5	1		4	0	0	0	0	0	1	1		15	17	1	90	1	2	13-Aug-14	2	6=Self-help book or brochure|8=Group counselling|11=Going to see a GP|2=Stop-smoking medication prescribed by a doctor called Zyban, Prexaton or Bupropion|5=Nicotine Replacement Therapy (NRT) (gum, patches, inhaler, lozenge, spray) brought without a prescription (e.g. from the supermarket or chemist)|9=Internet support|3=A stop-smoking medication prescribed by a doctor called Varenicline or Champ…	0	0	0	0	1	0	0	0	0
Smoke-Free Recovery	HBSV5 (EQ5D)	78866	1100	555a7c13-1be8-4ae0-a852-046d86948896		8/09/2015	10:29:01	No	1	1	13-Mar-80		1	1	1		4	2428	1	5	1		6	0	0	0	0	0	1	1		25	18	2	250	1	0	5-Sep-13	365	2=Stop-smoking medication prescribed by a doctor called Zyban, Prexaton or Bupropion|5=Nicotine Replacement Therapy (NRT) (gum, patches, inhaler, lozenge, spray) brought without a prescription (e.g. from the supermarket or chemist)|9=Internet support|11=Going to see a GP|8=Group counselling|1=Own will-power, no help|7=Alternative therapies such as herbal or natural remedies, hypnosis, relaxation …	0	0	0	0	0	0	0	0	0
Smoke-Free Recovery	HBSV5 (EQ5D)	78868	1101	555bf2e6-406c-4e2e-9459-726986948896		8/09/2015	11:04:33	No	1	2	21-Jun-40		4	1	2	England	4	2290	3	3	2		2	0	0	0	0	1	0
Smoke-Free Recovery	HBSV5 (EQ5D)	78870	2019	55ee4efa-2d98-4e2b-9674-730786948896		8/09/2015	13:01:09	Yes	2	2	25-Aug-51		4	1	1		4	2566	1	3	3		4	1	0	0	0	0	0
Smoke-Free Recovery	HBSV5 (EQ5D)	78872	1103	555d20e3-9790-4b7e-b3c9-313686948896		8/09/2015	14:18:57	No	1	1	29-Jan-54		4	1	1		4	2231	1	5	1		6	0	0	0	0	0	1
Smoke-Free Recovery	HBSV5 (EQ5D)	78875	2020	55ef7059-2cb0-4033-90e9-186686948896		9/09/2015	09:40:42	No	2	2	2-Jul-60		1	1	1		4	2166	1	4	2		2	0	0	0	0	1	0	1		20	15	2	90	1	2	20-Aug-15	5	9=Internet support|1=Own will-power, no help|7=Alternative therapies such as herbal or natural remedies, hypnosis, relaxation or accupuncture|3=A stop-smoking medication prescribed by a doctor called Varenicline or Champix|6=Self-help book or brochure|2=Stop-smoking medication prescribed by a doctor called Zyban, Prexaton or Bupropion|5=Nicotine Replacement Therapy (NRT) (gum, patches, inhaler, l…	0	0	0	0	1	0	0	0	0
Smoke-Free Recovery	HBSV5 (EQ5D)	78877	2021	55ef7a14-5728-420b-937c-2cbf86948896		9/09/2015	10:18:06	Yes	2	1	29-Apr-53		4	2	1		4	2171	1	5	1		6	0	0	0	0	0	1
Smoke-Free Recovery	HBSV5 (EQ5D)	78887	1102	555d1ca6-7a84-406a-a6ae-276786948896		10/09/2015	08:56:49	No	1	1	17-Mar-83		4	2	1		4	2316	1	5	1		6	0	1	0	0	0	0
Smoke-Free Recovery	HBSV5 (EQ5D)	78889	14	55f0bef9-6238-4b98-9f87-7df686948896		10/09/2015	09:21:30	No	1
Smoke-Free Recovery	HBSV5 (EQ5D)	78890	1104	555d293d-2f3c-4467-97b1-726786948896		10/09/2015	09:21:50	No	1	1	22-Jul-74		4	2	1		4	2365	1	3	1		6	1	0	0	0	0	0
Smoke-Free Recovery	HBSV5 (EQ5D)	78891	1105	556260c9-9f94-483a-aecc-631886948896		10/09/2015	09:32:50	Yes	1	1	6-Sep-71		4	1	1		4	2330	1	5	1		5	1	0	0	0	0	0
Smoke-Free Recovery	HBSV5 (EQ5D)	78895	2022	55f0c735-fd4c-452b-929a-7de286948896		10/09/2015	09:59:14	Yes	2	1	13-Jul-15		4	2	2	Iraq	4	2176	4	6	2		6	0	0	0	0	0	1
Smoke-Free Recovery	HBSV5 (EQ5D)	78896	1106	55626690-4f20-4182-9846-3aed86948896		10/09/2015	10:08:04	No	1	1	2-Sep-72		1	1	1		1	2303	4	4	1		6	0	0	0	0	0	1	1		10	21	2	100	2
Smoke-Free Recovery	HBSV5 (EQ5D)	78897	2023	55f0cab3-49a8-4058-b6d2-692386948896		10/09/2015	10:11:32	Yes	2	2	24-Jul-55		4	1	2	New zealand	4	2566	1	5	1		6	1	0	0	0	0	0
Smoke-Free Recovery	HBSV5 (EQ5D)	78900	1107	55626e02-4e00-46b0-b781-242686948896		10/09/2015	10:27:00	No	1	1	7-Feb-46		4	1	1		4	2317	1	3	2		3	0	0	0	0	1	0
Smoke-Free Recovery	HBSV5 (EQ5D)	78902	1108	556271d2-cb98-4812-971e-2e0e86948896		10/09/2015	10:51:43	Yes	1	1	19-Jun-93		4	2	1		4	2321	4	4	2		6	0	0	0	0	1	0
Smoke-Free Recovery	HBSV5 (EQ5D)	78904	1109	556273ea-8af8-490c-8dc3-242686948896		10/09/2015	14:37:20	No	1	1	27-Jun-77		4	1	1		4	2284	3	5	2		2	0	0	0	0	1	0
Smoke-Free Recovery	HBSV5 (EQ5D)	78906	1110	55627a53-cb68-4bfb-94b7-2e0e86948896		10/09/2015	14:53:32	No	1	1	28-Jan-69		4	1	1		4	2326	4	3	1		4	0	0	0	0	0	1
Smoke-Free Recovery	HBSV5 (EQ5D)	78910	2024	55f23fa6-f164-4682-8c9f-17bc86948896		11/09/2015	12:46:08	Yes	2	2	15-Feb-49		4	1	2	Usa	4	2164	1	3	1		2	1	0	0	0	0	0
Smoke-Free Recovery	HBSV5 (EQ5D)	78912	2025	55f24a8c-abec-4672-9988-124486948896		11/09/2015	13:33:10	Yes	2	1	8-Jun-65		4	2	2	England	4	2173	1	3	1		2	0	0	0	0	0	1
Smoke-Free Recovery	HBSV5 (EQ5D)	78919	2026	55f37eaf-4214-4611-b874-31d686948896		12/09/2015	11:27:50	No	2	1	3-Dec-80		4	1	2	Png	2	2787	4	3	2		6	0	0	0	0	1	0
Smoke-Free Recovery	HBSV5 (EQ5D)	78922	2028	55f74a3d-d26c-4f53-89b9-5b9486948896		15/09/2015	08:33:14	Yes	2	1	28-Aug-38		4	1	1		4	2605	1	6	2		6	0	0	0	0	0	1
Smoke-Free Recovery	HBSV5 (EQ5D)	78926	2029	55f8ab72-7888-4998-a664-23cb86948896		16/09/2015	09:44:47	Yes	2	2	30-Jan-59		4	2	2	Fiji	4	2168	1	5	1		2	0	0	0	0	1	0
Smoke-Free Recovery	HBSV5 (EQ5D)	78928	2030	55f8b283-78e8-43cd-aec6-574886948896		16/09/2015	10:13:21	Yes	2	1	19-Dec-55		3	1	1		4	2170	3	5	1		3	0	1	0	0	0	0	1		15	15	1	80	1	2	12-Aug-15	16	6=Self-help book or brochure|11=Going to see a GP|9=Internet support|8=Group counselling|2=Stop-smoking medication prescribed by a doctor called Zyban, Prexaton or Bupropion|7=Alternative therapies such as herbal or natural remedies, hypnosis, relaxation or accupuncture|3=A stop-smoking medication prescribed by a doctor called Varenicline or Champix|4=Nicotine Replacement Therapy (NRT) (gum, patc…	0	0	0	1	0	0	0	0	0
Smoke-Free Recovery	HBSV5 (EQ5D)	78935	MARKWTEST4	55f9da32-a8cc-46b6-86f6-780e86948896		17/09/2015	07:08:02	No		1	17-Sep-15		1	1	1		1	0	1	1	2		1	1	0	0	0	0	0	1		12	12	3	12	2
Smoke-Free Recovery	HBSV5 (EQ5D)	78936	1111	5563b515-f974-4da9-91b3-203d86948896		17/09/2015	08:49:46	No	1	1	31-Mar-93		4	1	1		4	2289	4	5	1		4	0	1	0	0	0	0
Smoke-Free Recovery	HBSV5 (EQ5D)	78937	1112	5563b803-893c-43d0-8a2e-1f7d86948896		17/09/2015	08:50:02	No	1	1	21-Mar-66		4	1	1		4	2335	2	6	1		5	1	0	0	0	0	0
Smoke-Free Recovery	HBSV5 (EQ5D)	78938	1115	5563f6d3-a368-470a-996e-5b9a86948896		17/09/2015	08:50:28	No	1	2	19-Dec-50		4	2	1		4	2287	3	3	2		2	0	0	0	0	1	0
Smoke-Free Recovery	HBSV5 (EQ5D)	78939	1011	552344ec-66c4-40e3-a5f6-0f4686948896		17/09/2015	08:51:09	No	1
Smoke-Free Recovery	HBSV5 (EQ5D)	78940	1200	5599c279-1194-4083-8539-01b186948896		17/09/2015	08:51:28	No	1	1	8-Apr-71		4	2	1		4	2316	1	5	2		2	0	0	0	0	1	0
Smoke-Free Recovery	HBSV5 (EQ5D)	78941	nat	55f9f338-c534-4927-a750-1e7f86948896		17/09/2015	08:54:49	No	1
Smoke-Free Recovery	HBSV5 (EQ5D)	78942	1113	5563c43a-74c4-4293-8a76-2fe586948896		17/09/2015	09:25:01	Yes	1	2	15-Oct-77		4	2	1		4	2283	4	5	2		3	0	0	0	0	1	0
Smoke-Free Recovery	HBSV5 (EQ5D)	78947	2031	55fa08a1-8868-44d8-a458-780e86948896		17/09/2015	10:31:05	Yes	2	1	6-Sep-65		4	2	2	Samoa	2	2166	1	4	1		2	0	0	0	0	0	1
Smoke-Free Recovery	HBSV5 (EQ5D)	78948	sam test sept	55fa0c71-5520-43ee-ba28-788386948896		17/09/2015	10:42:26	No		2	18-Sep-15		1	1	1		1	1111	3	4	1		1	0	0	1	0	0	0	3		12	12	3	12	2
Smoke-Free Recovery	HBSV5 (EQ5D)	78950	2032	55fb6f1d-9700-4aaf-89d3-5d8686948896		18/09/2015	11:57:14	No	2	1	9-Feb-49		1	1	1		4	2170	5	3	2		6	0	0	0	0	1	0	1		15	15	2	60	1	0	5-Sep-12	10	3=A stop-smoking medication prescribed by a doctor called Varenicline or Champix|7=Alternative therapies such as herbal or natural remedies, hypnosis, relaxation or accupuncture|5=Nicotine Replacement Therapy (NRT) (gum, patches, inhaler, lozenge, spray) brought without a prescription (e.g. from the supermarket or chemist)|6=Self-help book or brochure|4=Nicotine Replacement Therapy (NRT) (gum, pa…	0	0	0	1	0	0	0	0	0
Smoke-Free Recovery	HBSV5 (EQ5D)	78952	2033	55fb7900-810c-44b5-bbc3-690286948896		18/09/2015	12:40:14	Yes	2	1	13-Aug-54		4	2	1		4	2213	1	5	1		5	1	0	0	0	0	0
Smoke-Free Recovery	HBSV5 (EQ5D)	78954	2034	55fcb852-e8d0-4ebf-b485-3e0b86948896		19/09/2015	11:29:03	Yes	2	1	19-Jun-53		4	2	1		4	2143	4	3	2		2	0	0	0	0	0	1
Smoke-Free Recovery	HBSV5 (EQ5D)	78961	2035	56009a67-3170-4680-ad41-510a86948896		22/09/2015	10:09:07	Yes	2	2	9-Oct-64		4	2	2	england	4	2577	1	5	1		5	0	0	0	0	0	1
Smoke-Free Recovery	HBSV5 (EQ5D)	78964	2036	5601e9e6-a104-4607-bbe1-4df586948896		23/09/2015	09:56:41	No	2	2	28-Aug-46		1	1	1		4	2213	4	3	2		1	0	0	0	0	0	1	1		25	14	3	150	1	2	17-Sep-97	7	7=Alternative therapies such as herbal or natural remedies, hypnosis, relaxation or accupuncture|11=Going to see a GP|6=Self-help book or brochure|5=Nicotine Replacement Therapy (NRT) (gum, patches, inhaler, lozenge, spray) brought without a prescription (e.g. from the supermarket or chemist)|9=Internet support|8=Group counselling|2=Stop-smoking medication prescribed by a doctor called Zyban, Pre…	0	0	0	0	0	0	0	0	0
Smoke-Free Recovery	HBSV5 (EQ5D)	78971	2037	5604a54d-d978-4071-afe9-457786948896		25/09/2015	11:39:12	Yes	2	2	12-Mar-46		4	1	2	cyprus	4	2168	1	1	2		6	0	0	0	0	1	0
Smoke-Free Recovery	HBSV5 (EQ5D)	78973	2038	5604ac23-6744-4f71-bef1-54a386948896		25/09/2015	12:09:03	No	2	2	11-Apr-43		1	1	2	sudan	4	2170	1	4	2		6	0	0	1	0	0	0	1		10	30	2	50	2
Smoke-Free Recovery	HBSV5 (EQ5D)	78974	1114	5563caac-4214-4349-9f76-5b9a86948896		26/09/2015	09:33:52	No	1	1	28-Mar-77		4	2	1		4	2290	4	4	1		6	0	0	0	0	1	0
Smoke-Free Recovery	HBSV5 (EQ5D)	78976	1116	5563ff24-a640-436e-a01e-203d86948896		26/09/2015	10:17:57	No	1	2	28-Jul-58		4	2	1		4	2267	1	5	1		4	1	0	0	0	0	0
Smoke-Free Recovery	HBSV5 (EQ5D)	78977	1117	55640142-c4c4-4efb-a1e9-397886948896		26/09/2015	10:33:09	No	1	2	27-Oct-60		4	2	1		4	2282	1	5	1		6	0	0	0	0	0	1
Smoke-Free Recovery	HBSV5 (EQ5D)	78980	1118	55679fa3-f5c4-4780-840f-72a586948896		26/09/2015	10:55:27	No	1	1	28-Aug-48		4	2	1		4	2400	1	5	1		6	0	0	0	0	0	1
Smoke-Free Recovery	HBSV5 (EQ5D)	78982	1119	5567acbf-43b4-47e8-b1e5-58b886948896		26/09/2015	11:14:16	No	1	1	10-Feb-44		4	1	1		1	2360	1	5	2		6	1	0	0	0	0	0
Smoke-Free Recovery	HBSV5 (EQ5D)	78984	1120	556a6ee8-b96c-47a7-89b2-3b9586948896		26/09/2015	11:44:58	No	1	2	8-Jul-44		4	1	1		4	2289	1	3	2		6	1	0	0	0	0	0
Smoke-Free Recovery	HBSV5 (EQ5D)	78986	1121	556a72c4-01a4-4ccb-a1c2-6ddb86948896		26/09/2015	12:40:37	No	1	1	20-Mar-78		4	2	1		4	2333	2	5	1		5	0	0	0	0	0	1
Smoke-Free Recovery	HBSV5 (EQ5D)	78988	1122	556a7958-6b40-4793-879c-6dd986948896		27/09/2015	12:01:58	No	1	1	9-May-69		1	1	1		4	2287	4	3	2		1	0	0	0	0	1	0	1		15	13	3	60	1	0	9-May-14	3	4=Nicotine Replacement Therapy (NRT) (gum, patches, inhaler, lozenge, spray) recommended by a doctor|11=Going to see a GP|9=Internet support|1=Own will-power, no help|2=Stop-smoking medication prescribed by a doctor called Zyban, Prexaton or Bupropion|8=Group counselling|7=Alternative therapies such as herbal or natural remedies, hypnosis, relaxation or accupuncture|5=Nicotine Replacement Therapy…	0	0	0	0	0	0	0	0	0
Smoke-Free Recovery	HBSV5 (EQ5D)	78989	1123	556bd009-b5d0-498c-9621-311c86948896		27/09/2015	12:05:02	No	1	2	13-Sep-42		4	1	1		4	2287	3	3	2		2	0	0	0	0	1	0
Smoke-Free Recovery	HBSV5 (EQ5D)	78992	1124	556bd34b-be2c-42b7-8a4f-3c5c86948896		27/09/2015	12:50:47	No	1	2	7-May-69		4	2	1		4	2286	4	6	1		6	1	0	0	0	0	0
Smoke-Free Recovery	HBSV5 (EQ5D)	78995	2039	56089ecd-1bd4-46bb-95f8-0d6b86948896		28/09/2015	12:02:19	Yes	2	2	31-May-91		4	2	2	Iraq	4	2168	1	4	3		6	0	0	0	0	1	0
Smoke-Free Recovery	HBSV5 (EQ5D)	78997	2040	5609c2af-85c8-4051-85c4-051886948896		29/09/2015	08:47:16	Yes	2	1	27-Nov-84		4	2	1		4	2577	2	5	1		3	0	0	0	0	0	1
Smoke-Free Recovery	HBSV5 (EQ5D)	78999	2041	5609c5ac-98cc-49d1-a089-04fb86948896		29/09/2015	08:59:17	Yes	2	2	27-Feb-51		4	2	1		4	2173	5	3	2		4	0	0	0	0	1	0
Smoke-Free Recovery	HBSV5 (EQ5D)	79001	2042	5609cc15-0be8-4834-b678-312a86948896		29/09/2015	09:30:09	Yes	2	1	24-Nov-54		4	2	2	Finland	4	2518	1	5	1		6	0	0	0	0	0	1
Smoke-Free Recovery	HBSV5 (EQ5D)	79002	1125	556bdf12-da2c-469b-9f50-3a1886948896		29/09/2015	10:44:57	Yes	1	2	1-Apr-89		4	2	1		4	3072	4	6	1		3	1	0	0	0	0	0
Smoke-Free Recovery	HBSV5 (EQ5D)	79003	1126	556be314-dda4-4d79-86c6-58fa86948896		29/09/2015	10:48:28	Yes	1	1	18-Dec-76		4	2	2	Serbia	4	2256	1	6	1		5	0	1	0	0	0	0
Smoke-Free Recovery	HBSV5 (EQ5D)	79004	1128	556d1e9d-2b24-473f-a529-334b86948896		29/09/2015	11:48:36	No	1	1	16-Apr-85		4	2	1		1	2340	2	5	2		3	0	0	0	0	1	0
Smoke-Free Recovery	HBSV5 (EQ5D)	79008	1130	556d28a9-ed24-427d-b6d9-241786948896		2/10/2015	10:59:53	No	1	1	2-Jul-56		4	1	1		4	2299	1	3	1		6	0	0	0	0	0	1
Smoke-Free Recovery	HBSV5 (EQ5D)	79009	1131	556d2d8b-2ea4-40c3-b6e1-394886948896		2/10/2015	11:12:58	No	1	1	10-Oct-57		4	1	1		4	2322	1	3	1		6	1	0	0	0	0	0
Smoke-Free Recovery	HBSV5 (EQ5D)	79011	2043	560ddab7-86e4-4911-92ec-289786948896		2/10/2015	11:20:37	Yes	2	1	11-Feb-63		4	2	1		4	2570	4	5	1		5	1	0	0	0	0	0
Smoke-Free Recovery	HBSV5 (EQ5D)	79013	2044	560ddd82-8ca0-4689-82aa-331d86948896		2/10/2015	11:30:27	No	2	2	24-Oct-52		4	2	2	uruguay	4	2256	1	5	2		1	1	0	0	0	0	0
Smoke-Free Recovery	HBSV5 (EQ5D)	79014	1132	556e49f8-d0a4-4490-95dc-605686948896		2/10/2015	12:23:10	No	1	2	6-Nov-59		4	2	1		4	2315	3	6	1		6	1	0	0	0	0	0
Smoke-Free Recovery	HBSV5 (EQ5D)	79015	1133	556e4be3-7d54-4fa8-8361-12f686948896		2/10/2015	12:32:06	No	1	1	13-Mar-69		1	1	1		4	2304	4	3	2		2	0	0	0	0	1	0	2		15	14	2	40	1	0	14-Sep-15	21	7=Alternative therapies such as herbal or natural remedies, hypnosis, relaxation or accupuncture|2=Stop-smoking medication prescribed by a doctor called Zyban, Prexaton or Bupropion|5=Nicotine Replacement Therapy (NRT) (gum, patches, inhaler, lozenge, spray) brought without a prescription (e.g. from the supermarket or chemist)|1=Own will-power, no help|9=Internet support|8=Group counselling|10=Te…	0	0	0	0	1	0	0	0	0
Smoke-Free Recovery	HBSV5 (EQ5D)	79016	1134	556e55f4-9c3c-492b-9085-728986948896		2/10/2015	12:50:44	No	1	2	9-Feb-86		4	2	1		4	2287	4	5	1		4	1	0	0	0	0	0
Smoke-Free Recovery	HBSV5 (EQ5D)	79017	1135	556e5801-5060-4c45-95b8-1ee786948896		2/10/2015	13:00:59	No	1	2	2-Aug-57		4	2	1		4	2340	2	3	1		3	1	0	0	0	0	0
Smoke-Free Recovery	HBSV5 (EQ5D)	79018	1129	556d225c-b388-4f11-8a38-339d86948896		2/10/2015	13:29:36	No	1	1	19-Mar-66		1	1	1		4	2318	1	5	1		6	0	0	1	0	0	0	1		25	15	2	120	1	1	4-Jun-15	24	6=Self-help book or brochure|10=Telephone support (like Quitline)|8=Group counselling|7=Alternative therapies such as herbal or natural remedies, hypnosis, relaxation or accupuncture|1=Own will-power, no help|2=Stop-smoking medication prescribed by a doctor called Zyban, Prexaton or Bupropion|3=A stop-smoking medication prescribed by a doctor called Varenicline or Champix|9=Internet support|11=Go…	0	1	0	0	0	0	0	0	0
Smoke-Free Recovery	HBSV5 (EQ5D)	79020	1136	556e914d-a760-4784-85ee-12f686948896		2/10/2015	14:36:46	No	1	1	26-Apr-94		4	2	1		4	2321	4	5	1		6	1	0	0	0	0	0
Smoke-Free Recovery	HBSV5 (EQ5D)	79021	1137	5570f021-a084-4ba6-9717-36d386948896		2/10/2015	14:37:04	No	1	1	12-Mar-57		4	2	1		4	2381	2	5	1		6	1	0	0	0	0	0
Smoke-Free Recovery	HBSV5 (EQ5D)	79027	1138	5577c4dc-a45c-4d53-b9db-202b86948896		6/10/2015	11:41:38	Yes	1	2	16-Aug-60		4	1	1		4	2283	1	6	1		5	1	0	0	0	0	0
Smoke-Free Recovery	HBSV5 (EQ5D)	79029	2045	561318fa-f9cc-4581-8b18-31e086948896		6/10/2015	11:45:09	Yes	2	2	14-Aug-92		4	2	1		4	2174	2	5	1		6	0	1	0	0	0	0
Smoke-Free Recovery	HBSV5 (EQ5D)	79031	1139	5578a7c9-a5c0-4740-8626-4e5886948896		6/10/2015	11:55:33	Yes	1	1	22-Aug-50		4	2	1		4	2287	1	3	2		2	1	0	0	0	0	0
Smoke-Free Recovery	HBSV5 (EQ5D)	79034	2046	56131d40-dc00-45d4-8359-363586948896		6/10/2015	12:03:08	Yes	2	1	4-Feb-69		4	1	2	france	4	2575	3	5	1		6	0	0	0	0	0	1
Smoke-Free Recovery	HBSV5 (EQ5D)	79036	2047	56132338-6514-4c2e-8803-46d786948896		6/10/2015	12:29:52	Yes	2	1	24-May-46		4	1	2	England	4	2560	1	3	2		6	0	0	0	1	0	0
Smoke-Free Recovery	HBSV5 (EQ5D)	79037	1140	552751b8-b3cc-4dc8-93ea-3be286948896		6/10/2015	13:03:17	No	1	1	20-Dec-74		1	1	1		4	2285	1	5	1		4	0	0	0	0	0	1	1		10	16	1	60	1	0	11-Jan-12	5	10=Telephone support (like Quitline)|3=A stop-smoking medication prescribed by a doctor called Varenicline or Champix|7=Alternative therapies such as herbal or natural remedies, hypnosis, relaxation or accupuncture|9=Internet support|5=Nicotine Replacement Therapy (NRT) (gum, patches, inhaler, lozenge, spray) brought without a prescription (e.g. from the supermarket or chemist)|8=Group counsellin…	1	0	0	0	0	0	0	0	0
Smoke-Free Recovery	HBSV5 (EQ5D)	79038	1141	5578ab49-16dc-45a3-a15d-7c9886948896		6/10/2015	13:28:00	Yes	1	2	17-Nov-72		4	1	1		4	0	2	6	2		1	0	0	0	0	1	0
Smoke-Free Recovery	HBSV5 (EQ5D)	79040	1142	5578adc2-b968-4149-ac86-62bd86948896		7/10/2015	08:58:54	Yes	1	1	4-Mar-88		4	2	1		4	2305	4	4	1		3	0	0	0	0	0	1
Smoke-Free Recovery	HBSV5 (EQ5D)	79041	1143	5578b024-6f68-4318-89c0-7c9886948896		7/10/2015	09:02:06	Yes	1	2	20-Jul-59		4	2	1		1	2290	1	3	1		4	1	0	0	0	0	0
Smoke-Free Recovery	HBSV5 (EQ5D)	79043	1144	5578b32c-1aec-4b0b-9f34-0fc386948896		7/10/2015	09:52:37	Yes	1	1	10-Jun-77		4	2	1		4	2287	4	4	1		6	0	0	0	0	0	1
Smoke-Free Recovery	HBSV5 (EQ5D)	79044	1145	5578c019-23a0-4909-9211-05d786948896		7/10/2015	10:12:56	No	1	1	10-Jun-88		2	1	1		4	2306	2	3	1		2	0	0	0	0	0	1	2		3	17	0	10	1	0	3-Oct-13	365	2=Stop-smoking medication prescribed by a doctor called Zyban, Prexaton or Bupropion|6=Self-help book or brochure|1=Own will-power, no help|4=Nicotine Replacement Therapy (NRT) (gum, patches, inhaler, lozenge, spray) recommended by a doctor|9=Internet support|8=Group counselling|5=Nicotine Replacement Therapy (NRT) (gum, patches, inhaler, lozenge, spray) brought without a prescription (e.g. from …	1	0	0	0	0	0	0	0	0
Smoke-Free Recovery	HBSV5 (EQ5D)	79059	1127	556be565-02d0-4948-a970-35f786948896		7/10/2015	12:35:02	No	1	1	8-Oct-54		4	2	1		4	2380	1	3	1		4	1	0	0	0	0	0
Smoke-Free Recovery	HBSV5 (EQ5D)	79060	1146	5578c4c9-7590-4304-820e-7c9886948896		7/10/2015	12:47:33	No	1	1	26-Aug-99		4	2	1		4	2321	4	3	5	Volunteers	1	0	0	0	0	0	1
Smoke-Free Recovery	HBSV5 (EQ5D)	79064	2048	5615b696-e21c-4869-9f94-7d1b86948896		8/10/2015	11:31:06	Yes	2	2	3-Dec-43		4	1	1		4	2587	1	3	2		1	0	0	0	0	0	1
Smoke-Free Recovery	HBSV5 (EQ5D)	79069	2049	5617231c-e42c-4677-900f-36eb86948896		9/10/2015	13:16:55	Yes	2	2	5-Sep-73		4	2	1		4	2580	1	4	1		5	0	1	0	0	0	0
Smoke-Free Recovery	HBSV5 (EQ5D)	79072	1147	5578ca08-4c34-4fcd-834b-39f486948896		11/10/2015	11:14:46	Yes	1	2	7-Aug-87		4	2	1		4	2289	1	6	1		5	1	0	0	0	0	0
Smoke-Free Recovery	HBSV5 (EQ5D)	79074	1148	5578cab2-a630-4200-8565-02b286948896		11/10/2015	11:37:23	No	1	2	27-Dec-62		1	1	1		4	2318	2	5	2		1	0	0	0	0	1	0	1		10	48	1	70	1	2	31-Dec-14	11	1=Own will-power, no help|4=Nicotine Replacement Therapy (NRT) (gum, patches, inhaler, lozenge, spray) recommended by a doctor|9=Internet support|11=Going to see a GP|8=Group counselling|3=A stop-smoking medication prescribed by a doctor called Varenicline or Champix|6=Self-help book or brochure|5=Nicotine Replacement Therapy (NRT) (gum, patches, inhaler, lozenge, spray) brought without a prescri…	1	0	0	0	0	0	0	0	0
Smoke-Free Recovery	HBSV5 (EQ5D)	79080	2050	561c7a90-5acc-48d8-a20e-471f86948896		13/10/2015	14:33:18	Yes	2	1	4-Apr-72		4	1	1		4	2749	4	5	1		3	0	0	0	0	0	1
Smoke-Free Recovery	HBSV5 (EQ5D)	79082	2051	561c84b8-5948-48b2-a395-3e8086948896		13/10/2015	15:17:56	No	2	1	24-Feb-76		1	1	1		4	4118	1	3	5	Self employed	5	1	0	0	0	0	0	1		18	15	2	150	1	0	1-Jun-14	3	6=Self-help book or brochure|9=Internet support|1=Own will-power, no help|10=Telephone support (like Quitline)|4=Nicotine Replacement Therapy (NRT) (gum, patches, inhaler, lozenge, spray) recommended by a doctor|5=Nicotine Replacement Therapy (NRT) (gum, patches, inhaler, lozenge, spray) brought without a prescription (e.g. from the supermarket or chemist)|3=A stop-smoking medication prescribed b…	0	0	1	0	0	0	1	0	0
Smoke-Free Recovery	HBSV5 (EQ5D)	79089	1150	557a3d11-8014-43b7-99ad-730e86948896		14/10/2015	11:41:35	No	1	1	6-Apr-77		1	1	1		4	2324	3	3	2		1	0	0	0	0	0	1	1		10	19	2	60	2
Smoke-Free Recovery	HBSV5 (EQ5D)	79090	1152	557fa76a-626c-4906-b267-168786948896		14/10/2015	11:52:16	Yes	1	2	20-Aug-53		4	2	1		4	2300	5	5	4		5	0	1	0	0	0	0
Smoke-Free Recovery	HBSV5 (EQ5D)	79091	1153	557fab5b-c280-4aa7-8c26-3ae086948896		14/10/2015	12:17:27	No	1	2	20-Dec-56		4	2	1		4	2316	3	5	2		2	0	0	0	0	1	0
Smoke-Free Recovery	HBSV5 (EQ5D)	79092	1154	557fb06b-e0b0-4d84-bbd3-68fc86948896		14/10/2015	12:38:57	No	1	1	11-Jan-68		1	1	1		2	2430	4	5	2		2	0	0	0	0	1	0	1		6	21	2	45	1	0	1-Sep-14	14	10=Telephone support (like Quitline)|1=Own will-power, no help|5=Nicotine Replacement Therapy (NRT) (gum, patches, inhaler, lozenge, spray) brought without a prescription (e.g. from the supermarket or chemist)|6=Self-help book or brochure|4=Nicotine Replacement Therapy (NRT) (gum, patches, inhaler, lozenge, spray) recommended by a doctor|2=Stop-smoking medication prescribed by a doctor called Zyb…	0	0	0	0	1	0	0	0	0
Smoke-Free Recovery	HBSV5 (EQ5D)	79093	1151	557a40e7-0c80-4e75-9d0a-08ce86948896		14/10/2015	13:35:33	No	1	2	2-Mar-48		4	2	1		4	2282	1	4	2		6	0	0	0	0	1	0
Smoke-Free Recovery	HBSV5 (EQ5D)	79103	1155	558245b8-2408-4582-a29b-055786948896		16/10/2015	10:14:35	No	1	1	30-Jun-80		4	2	1		4	2283	1	5	1		6	0	1	0	0	0	0
Smoke-Free Recovery	HBSV5 (EQ5D)	79105	1156	5582461c-5cc0-460d-9b25-3d8486948896		16/10/2015	10:23:29	No	1	2	18-Oct-62		4	2	1		4	2300	4	5	1		4	1	0	0	0	0	0
Smoke-Free Recovery	HBSV5 (EQ5D)	79107	1157	5582491a-2f8c-43c9-a581-75a486948896		16/10/2015	10:55:56	No	1	2	13-Jun-57		4	1	2	New Zealand	4	2330	1	5	2		6	1	0	0	0	0	0
Smoke-Free Recovery	HBSV5 (EQ5D)	79108	1158	55824b8f-f600-4ebd-9a29-055786948896		16/10/2015	11:08:41	No	1	1	19-Nov-42		4	2	1		4	2282	1	3	2		2	0	0	0	0	1	0
Smoke-Free Recovery	HBSV5 (EQ5D)	79115	2052	56242801-717c-4a26-8adc-75fe86948896		19/10/2015	10:18:40	Yes	2	2	20-Oct-44		4	1	2	Lebanon	4	2152	5	5	4		1	1	0	0	0	0	0
Smoke-Free Recovery	HBSV5 (EQ5D)	79117	2053	56242d34-debc-4e6d-91b3-654386948896		19/10/2015	10:41:14	Yes	2	1	16-May-57		4	1	1		4	2570	1	3	1		4	0	1	0	0	0	0
Smoke-Free Recovery	HBSV5 (EQ5D)	79121	2056	56258e0f-f31c-4f20-b573-1f7686948896		20/10/2015	11:42:55	No	2	1	1-Feb-76		1	1	2	new zealand	4	2193	1	3	1		2	0	0	0	0	1	0	1		4	18	0	20	2
Smoke-Free Recovery	HBSV5 (EQ5D)	79122	2054	56242f58-22c4-45f9-b44e-654486948896		20/10/2015	12:01:41	Yes	2	2	8-May-52		4	1	1		4	2163	3	3	2		2	0	0	0	0	1	0
Smoke-Free Recovery	HBSV5 (EQ5D)	79125	2057	5625a576-0e20-47e2-bba2-3afa86948896		20/10/2015	13:22:47	No	2	1	10-Dec-87		1	1	1		4	2777	2	3	1		3	0	0	0	0	0	1	2		10	17	2	50	1	0	20-Oct-14	210	1=Own will-power, no help|10=Telephone support (like Quitline)|2=Stop-smoking medication prescribed by a doctor called Zyban, Prexaton or Bupropion|7=Alternative therapies such as herbal or natural remedies, hypnosis, relaxation or accupuncture|8=Group counselling|9=Internet support|3=A stop-smoking medication prescribed by a doctor called Varenicline or Champix|4=Nicotine Replacement Therapy (NR…	0	0	0	0	0	0	0	0	0
Smoke-Free Recovery	HBSV5 (EQ5D)	79134	1159	55824ded-1704-4179-9027-75a486948896		22/10/2015	10:35:40	Yes	1	2	7-Aug-57		4	2	2	Malaysia	4	2290	3	3	1		2	0	0	0	0	1	0
Smoke-Free Recovery	HBSV5 (EQ5D)	79145	1160	562971e0-d4fc-45f1-9a35-7f1886948896		23/10/2015	10:31:44	No	1	2	29-Apr-43		4	2	1		4	2280	5	3	2		2	0	0	0	1	0	0
Smoke-Free Recovery	HBSV5 (EQ5D)	79147	1161	558366d3-a670-4fe0-98c1-055786948896		23/10/2015	10:56:33	No	1	1	14-Dec-88		4	2	1		4	2528	2	3	1		6	1	0	0	0	0	0
Smoke-Free Recovery	HBSV5 (EQ5D)	79153	1162	558366d7-6c9c-4d54-a63c-5a6d86948896		25/10/2015	13:06:22	No	1	2	13-May-95		4	2	1		4	2264	4	5	1		2	0	0	0	0	0	1
Smoke-Free Recovery	HBSV5 (EQ5D)	79154	1163	55860111-6808-43cd-a86a-229e86948896		25/10/2015	13:12:21	No	1	1	16-Dec-81		4	2	1		4	2284	4	5	1		6	0	0	0	0	0	1
Smoke-Free Recovery	HBSV5 (EQ5D)	79157	1164	5586021e-749c-4183-b9d9-229a86948896		25/10/2015	13:46:42	Yes	1	1	5-Jun-78		4	2	1		4	2280	3	5	1		2	0	0	0	0	0	1
Smoke-Free Recovery	HBSV5 (EQ5D)	79158	1165	55860426-6cbc-48fb-a2c9-229c86948896		25/10/2015	13:56:26	Yes	1	1	19-Aug-83		4	1	1		4	2290	4	5	1		3	1	0	0	0	0	0
Smoke-Free Recovery	HBSV5 (EQ5D)	79161	1166	55860eab-d6ec-49c3-865c-2af686948896		26/10/2015	09:37:16	No	1	2	23-Oct-45		1	1	1		4	2287	3	3	2		1	0	0	0	0	1	0	1		25	17	2	70	1	0	8-Oct-13	7	10=Telephone support (like Quitline)|11=Going to see a GP|8=Group counselling|6=Self-help book or brochure|3=A stop-smoking medication prescribed by a doctor called Varenicline or Champix|7=Alternative therapies such as herbal or natural remedies, hypnosis, relaxation or accupuncture|1=Own will-power, no help|4=Nicotine Replacement Therapy (NRT) (gum, patches, inhaler, lozenge, spray) recommended…	0	0	0	1	0	0	0	0	0
Smoke-Free Recovery	HBSV5 (EQ5D)	79163	1167	558766da-cf50-472c-950e-2afb86948896		26/10/2015	09:56:21	No	1	1	18-Nov-45		4	2	1		4	2299	1	4	2		6	0	0	0	0	1	0
Smoke-Free Recovery	HBSV5 (EQ5D)	79231	1168	55877360-8020-4acb-9eeb-22a086948896		28/10/2015	09:29:42	No	1	1	20-Sep-42		4	3	1		4	2430	1	5	2		1	1	0	0	0	0	0
Smoke-Free Recovery	HBSV5 (EQ5D)	79233	1169	558775b8-f2c8-4128-9f47-229b86948896		28/10/2015	10:58:21	No	1	1	10-Nov-61		1	1	1		4	2256	1	4	1		5	1	0	0	0	0	0	1		20	16	2	120	1	1	2-Feb-15	2	5=Nicotine Replacement Therapy (NRT) (gum, patches, inhaler, lozenge, spray) brought without a prescription (e.g. from the supermarket or chemist)|11=Going to see a GP|3=A stop-smoking medication prescribed by a doctor called Varenicline or Champix|8=Group counselling|2=Stop-smoking medication prescribed by a doctor called Zyban, Prexaton or Bupropion|6=Self-help book or brochure|7=Alternative th…	0	0	0	0	1	0	0	0	0
Smoke-Free Recovery	HBSV5 (EQ5D)	79239	2058	5625a3e8-8c68-4af4-b8ab-41b286948896		28/10/2015	11:59:49	Yes	2	2	8-Apr-90		4	2	2	England	4	2560	2	6	1		3	0	0	0	0	0	1
Smoke-Free Recovery	HBSV5 (EQ5D)	79241	2059	56301f18-ff9c-4895-8f3b-029986948896		28/10/2015	12:08:00	Yes	2	2	8-Dec-42		4	2	1		4	2164	1	4	5	home work	4	1	0	0	0	0	0
Smoke-Free Recovery	HBSV5 (EQ5D)	79245	1170	55888f71-52a8-4834-983b-347686948896		28/10/2015	12:59:36	No	1	1	30-Dec-74		1	1	1		1	2423	4	5	1		6	0	0	0	0	0	1	1		15	18	1	45	1	0	1-Jul-11	730	5=Nicotine Replacement Therapy (NRT) (gum, patches, inhaler, lozenge, spray) brought without a prescription (e.g. from the supermarket or chemist)|3=A stop-smoking medication prescribed by a doctor called Varenicline or Champix|6=Self-help book or brochure|7=Alternative therapies such as herbal or natural remedies, hypnosis, relaxation or accupuncture|11=Going to see a GP|1=Own will-power, no hel…	1	0	0	0	0	0	0	0	0
Smoke-Free Recovery	HBSV5 (EQ5D)	79247	1171	55889282-08a0-4e27-a65b-347686948896		28/10/2015	13:52:07	No	1	1	2-Sep-47		4	2	1		4	2324	1	5	2		1	0	0	0	1	0	0
Smoke-Free Recovery	HBSV5 (EQ5D)	79267	2060	56318007-9fd8-4a04-a94e-3e3f86948896		29/10/2015	13:13:53	Yes	2	2	4-Apr-59		4	2	2	malta	4	4020	5	5	1		3	0	0	0	1	0	0
Smoke-Free Recovery	HBSV5 (EQ5D)	79296	1174	558b45ca-b708-433a-9c58-7eee86948896		2/11/2015	13:01:06	Yes	1	1	21-Jan-92		4	1	1		4	2315	4	3	5	Unemployed	1	0	0	0	0	0	1
Smoke-Free Recovery	HBSV5 (EQ5D)	79297	1175	558b46cc-7974-44b8-a077-7e4386948896		2/11/2015	13:26:34	No	1	2	5-Feb-77		4	1	1		4	2287	1	5	1		4	1	0	0	0	0	0
Smoke-Free Recovery	HBSV5 (EQ5D)	79299	1172	558893c3-bdf0-414e-bce0-347586948896		2/11/2015	13:40:48	No	1	2	14-Aug-49		4	2	1		4	2291	1	6	1		5	1	0	0	0	0	0
Smoke-Free Recovery	HBSV5 (EQ5D)	79301	1173	558b3c13-e428-45a8-b50b-4bdd86948896		2/11/2015	13:51:48	No	1	2	21-Nov-61		4	2	2	Germany	4	2444	1	6	1		5	1	0	0	0	0	0
Smoke-Free Recovery	HBSV5 (EQ5D)	79327	1176	558b48ee-e8ec-4006-8d52-7be486948896		4/11/2015	09:13:02	No	1	1	30-Dec-52		4	1	1		4	2289	1	5	2		3	0	0	0	0	1	0
Smoke-Free Recovery	HBSV5 (EQ5D)	79332	2061	563953e0-cb90-479d-bbc6-658086948896		4/11/2015	11:42:45	Yes	2	1	9-Jul-50		4	1	1		4	2170	1	6	2		4	0	0	0	0	1	0
Smoke-Free Recovery	HBSV5 (EQ5D)	79366	2062	563ab0c5-48e0-4d82-a94c-63eb86948896		5/11/2015	12:30:08	Yes	2	1	9-Jan-92		4	2	1		4	2330	4	4	1		2	1	0	0	0	0	0
Smoke-Free Recovery	HBSV5 (EQ5D)	79388	2063	563d4361-2d7c-4f66-9616-34e786948896		7/11/2015	11:21:54	No	2	1	10-Oct-81		1	1	1		4	2171	4	4	2		6	0	0	0	0	1	0	2		20	15	2	55	1	0	12-Nov-13	10	2=Stop-smoking medication prescribed by a doctor called Zyban, Prexaton or Bupropion|10=Telephone support (like Quitline)|11=Going to see a GP|9=Internet support|8=Group counselling|5=Nicotine Replacement Therapy (NRT) (gum, patches, inhaler, lozenge, spray) brought without a prescription (e.g. from the supermarket or chemist)|7=Alternative therapies such as herbal or natural remedies, hypnosis, …	0	0	0	0	0	0	0	0	0
Smoke-Free Recovery	HBSV5 (EQ5D)	79390	1177	558de70b-12fc-4218-b174-594f86948896		9/11/2015	10:49:13	Yes	1	1	5-Dec-36		4	1	1		4	2103	1	6	4		3	1	0	0	0	0	0
Smoke-Free Recovery	HBSV5 (EQ5D)	79391	1178	558de969-9ce0-4e38-b6c1-62b686948896		9/11/2015	10:53:08	No	1	1	9-Sep-88		2	1	1		1	2330	2	5	1		3	0	0	0	0	0	1	1		2	17	0	22	2
Smoke-Free Recovery	HBSV5 (EQ5D)	79393	1179	558f8682-3ee8-4b0a-9900-2d6586948896		9/11/2015	11:26:56	No	1	2	20-Oct-38		4	1	1		4	2289	5	5	2		2	1	0	0	0	0	0
Smoke-Free Recovery	HBSV5 (EQ5D)	79394	1180	558f88c9-10e4-4eb6-8fa4-2d6386948896		9/11/2015	11:44:27	No	1	2	27-Feb-58		4	1	1		4	2259	1	5	1		2	0	0	0	0	0	1
Smoke-Free Recovery	HBSV5 (EQ5D)	79395	1181	558f8a76-1608-49fe-947e-2d6386948896		9/11/2015	11:47:56	Yes	1	1	3-Nov-15		4	2	1		4	2779	1	5	1		6	0	0	0	0	0	1
Smoke-Free Recovery	HBSV5 (EQ5D)	79407	2064	56413fd6-89d0-4170-8f71-397c86948896		10/11/2015	11:55:05	No	2	2	15-Feb-55		4	2	1		4	2565	1	3	2		2	1	0	0	0	0	0
Smoke-Free Recovery	HBSV5 (EQ5D)	79414	1182	558f8c15-ed58-44b9-b50a-104286948896		11/11/2015	09:48:26	No	1	1	17-Jun-89		4	1	1		4	2320	2	4	1		6	0	0	0	0	1	0
Smoke-Free Recovery	HBSV5 (EQ5D)	79417	1183	558f9071-b18c-4d28-9869-2d6686948896		11/11/2015	10:03:25	Yes	1	1	26-Nov-64		4	2	1		4	2358	1	3	2		2	1	0	0	0	0	0
Smoke-Free Recovery	HBSV5 (EQ5D)	79434	1184	559087ab-42d8-4471-988a-104286948896		12/11/2015	08:47:06	No	1	1	31-Oct-59		4	1	1		4	2291	4	3	2		1	0	0	0	0	1	0
Smoke-Free Recovery	HBSV5 (EQ5D)	79437	1185	5590880f-e6d4-438f-9222-2d6286948896		12/11/2015	09:07:42	No	1	2	23-May-59		4	1	1		4	2298	2	5	2		1	0	0	0	0	1	0
Smoke-Free Recovery	HBSV5 (EQ5D)	79438	1186	55908d8f-c238-4262-8068-104086948896		12/11/2015	09:30:38	Yes	1	1	12-Nov-66		4	1	2	England	4	2281	1	6	1		5	1	0	0	0	0	0
Smoke-Free Recovery	HBSV5 (EQ5D)	79443	2065	5643cfa0-dd88-48ef-88f3-3e9e86948896		12/11/2015	10:32:28	No	2	1	29-Oct-74		1	1	2	scottland	4	2761	2	5	1		4	0	0	1	0	0	0	2		20	16	3	50	1	1	10-Nov-15	6	2=Stop-smoking medication prescribed by a doctor called Zyban, Prexaton or Bupropion|6=Self-help book or brochure|7=Alternative therapies such as herbal or natural remedies, hypnosis, relaxation or accupuncture|1=Own will-power, no help|4=Nicotine Replacement Therapy (NRT) (gum, patches, inhaler, lozenge, spray) recommended by a doctor|3=A stop-smoking medication prescribed by a doctor called Var…	1	0	0	0	0	0	0	0	0
Smoke-Free Recovery	HBSV5 (EQ5D)	79445	1187	5590906e-a0e8-4a62-a1f5-103e86948896		12/11/2015	11:06:42	No	1	1	5-May-54		4	1	1		4	2287	1	5	1		5	1	0	0	0	0	0
Smoke-Free Recovery	HBSV5 (EQ5D)	79447	1188	5590972c-27ac-4933-88e4-2d6786948896		12/11/2015	11:23:11	No	1	2	6-Aug-56		4	2	1		4	2328	1	4	5	Farmers self employed	6	1	0	0	0	0	0
Smoke-Free Recovery	HBSV5 (EQ5D)	79452	1189	55922252-aa60-4e4f-b3de-2c8886948896		12/11/2015	12:43:44	No	1	2	12-Jan-45		4	1	1		4	2281	1	3	2		6	1	0	0	0	0	0
Smoke-Free Recovery	HBSV5 (EQ5D)	79453	1190	5592255c-2990-4869-8708-11c586948896		12/11/2015	13:02:28	No	1	2	21-Jan-57		4	1	1		4	2281	1	3	1		3	0	0	0	0	0	1
Smoke-Free Recovery	HBSV5 (EQ5D)	79454	1191	55945f6d-96b8-4244-9526-2cf786948896		12/11/2015	13:23:02	No	1	2	20-Jul-42		4	2	1		4	2315	5	6	2		2	1	0	0	0	0	0
Smoke-Free Recovery	HBSV5 (EQ5D)	79470	2066	56469401-6cc4-4377-afaa-3fea86948896		14/11/2015	12:56:57	No	2	1	9-Jun-15		4	1	1		4	2176	4	2	2		6	0	0	0	0	1	0
Smoke-Free Recovery	HBSV5 (EQ5D)	79474	2067	56493200-abb4-433c-9d0e-3d0386948896		16/11/2015	12:33:45	Yes	2	1	11-Aug-64		4	2	1		4	2526	1	5	4		6	1	0	0	0	0	0
Smoke-Free Recovery	HBSV5 (EQ5D)	79477	1192	5594611c-9488-412d-83ec-2cf486948896		16/11/2015	14:48:13	No	1	1	24-May-60		4	1	1		4	2299	1	3	1		6	1	0	0	0	0	0
Smoke-Free Recovery	HBSV5 (EQ5D)	79478	1193	5594c863-e9f0-4bbc-a91b-0f4e86948896		16/11/2015	15:06:35	No	1	2	17-May-61		4	2	1		4	2280	1	6	1		5	1	0	0	0	0	0
Smoke-Free Recovery	HBSV5 (EQ5D)	79480	1194	5594ca44-a010-43ce-a3b7-2cfc86948896		16/11/2015	15:19:41	No	1	1	27-Jul-53		4	1	1		4	2326	1	5	1		6	1	0	0	0	0	0
Smoke-Free Recovery	HBSV5 (EQ5D)	79488	2068	564a7b3d-51ec-4c5e-a468-63a986948896		17/11/2015	11:58:14	No	2	1	3-Mar-46		4	1	1		4	2176	1	2	1		3	0	1	0	0	0	0
Smoke-Free Recovery	HBSV5 (EQ5D)	79506	1201	5599c54b-7624-4f7c-b4b4-1b7e86948896		19/11/2015	09:39:57	No	1	1	31-Jan-53		4	1	1		4	2287	1	5	1		3	0	0	0	0	0	1
Smoke-Free Recovery	HBSV5 (EQ5D)	79507	1202	5599cdbe-1e68-407c-850d-1b8086948896		19/11/2015	10:14:08	No	1	2	25-Oct-56		4	1	1		4	2319	1	5	1		5	0	0	0	0	0	1
Smoke-Free Recovery	HBSV5 (EQ5D)	79510	vivian	564d128d-c210-455b-ae4a-4c5386948896		19/11/2015	11:06:38	No	2	2	10-Nov-15		4	2
Smoke-Free Recovery	HBSV5 (EQ5D)	79515	2069	564d328a-63a0-487d-89fc-777786948896		19/11/2015	13:25:06	No	2	2	9-Sep-52		4	2	1		4	2560	3	3	1		2	0	0	0	0	0	1
Smoke-Free Recovery	HBSV5 (EQ5D)	79521	1195	5594cc71-a1ec-4f96-b6a6-2cfe86948896		20/11/2015	11:12:32	Yes	1	1	12-Sep-84		4	1	1		4	2304	4	4	1		4	0	0	1	0	0	0
Smoke-Free Recovery	HBSV5 (EQ5D)	79522	1196	5595f5fd-7ab4-48b1-a1db-2cfb86948896		20/11/2015	11:19:39	Yes	1	2	2-Mar-60		4	2	1		4	2285	4	5	1		4	1	0	0	0	0	0
Smoke-Free Recovery	HBSV5 (EQ5D)	79526	1197	5595fb4d-7700-47fb-a405-2cf786948896		20/11/2015	11:56:57	Yes	1	1	12-Dec-86		4	1	1		4	2290	4	3	2		1	0	0	0	0	1	0
Smoke-Free Recovery	HBSV5 (EQ5D)	79528	1198	5599bbcd-dac4-4eb0-8b95-01b486948896		20/11/2015	13:08:22	No	1	2	12-Feb-62		4	1	1		4	2287	1	6	1		6	1	0	0	0	0	0
Smoke-Free Recovery	HBSV5 (EQ5D)	79529	1199	5599bcaf-d288-4cb2-ae88-1b7e86948896		20/11/2015	13:12:48	No	1	1	2-Mar-92		1	1	1		4	2293	2	5	1		6	0	0	0	0	0	1	1		5	17	2	60	1	1	5-Apr-11	10	10=Telephone support (like Quitline)|11=Going to see a GP|1=Own will-power, no help|6=Self-help book or brochure|5=Nicotine Replacement Therapy (NRT) (gum, patches, inhaler, lozenge, spray) brought without a prescription (e.g. from the supermarket or chemist)|7=Alternative therapies such as herbal or natural remedies, hypnosis, relaxation or accupuncture|3=A stop-smoking medication prescribed by …	0	0	0	0	0	0	0	0	0
Smoke-Free Recovery	HBSV5 (EQ5D)	79534	2070	564fb00b-a084-462e-afee-723386948896		21/11/2015	10:44:39	No	2	1	23-Sep-15		4	2	1		4	2168	2	3	1		6	0	0	0	0	0	1
Smoke-Free Recovery	HBSV5 (EQ5D)	79535	2071	564fb54e-eb68-4b6e-bcfa-723386948896		21/11/2015	11:05:34	Yes	2	1	3-Nov-15		4	2	1		4	2364	2	4	2		1	0	0	0	0	1	0
Smoke-Free Recovery	HBSV5 (EQ5D)	79545	2072	56527b7f-bea4-48d1-b6ba-25ba86948896		23/11/2015	13:37:46	Yes	2	1	6-Dec-67		4	2	2	malaysia	4	2168	4	3	2		6	0	0	0	0	0	1
Smoke-Free Recovery	HBSV5 (EQ5D)	79547	2073	56527ec3-69d0-43d2-82e6-25ba86948896		23/11/2015	13:52:42	No	2	1	17-Dec-78		1	1	1		4	2170	1	3	1		2	0	0	0	0	0	1	1		20	18	3	110	1	1	23-Aug-11	3	11=Going to see a GP|6=Self-help book or brochure|4=Nicotine Replacement Therapy (NRT) (gum, patches, inhaler, lozenge, spray) recommended by a doctor|10=Telephone support (like Quitline)|2=Stop-smoking medication prescribed by a doctor called Zyban, Prexaton or Bupropion|9=Internet support|7=Alternative therapies such as herbal or natural remedies, hypnosis, relaxation or accupuncture|8=Group co…	0	0	0	0	0	0	0	0	0
Smoke-Free Recovery	HBSV5 (EQ5D)	79553	1203	5599cf21-9bd4-4bf7-a163-1b7a86948896		24/11/2015	10:14:43	No	1	1	10-Sep-92		1	1	1		4	2283	4	4	2		6	0	0	0	0	1	0	1		12	17	1	100	1	0	10-Sep-14	3	10=Telephone support (like Quitline)|3=A stop-smoking medication prescribed by a doctor called Varenicline or Champix|11=Going to see a GP|9=Internet support|5=Nicotine Replacement Therapy (NRT) (gum, patches, inhaler, lozenge, spray) brought without a prescription (e.g. from the supermarket or chemist)|8=Group counselling|1=Own will-power, no help|6=Self-help book or brochure|4=Nicotine Replacem…	1	0	0	0	0	0	0	0	0
Smoke-Free Recovery	HBSV5 (EQ5D)	79554	1204	5599d3a2-8e48-448e-8163-01b286948896		24/11/2015	10:19:34	No	1	1	22-Sep-97		4	2	1		4	2250	4	5	1		2	0	0	0	0	0	1
Smoke-Free Recovery	HBSV5 (EQ5D)	79555	1205	5599dac0-2dc4-417b-abcb-01b486948896		24/11/2015	10:31:35	No	1	2	20-Dec-41		4	2	1		4	2284	5	3	2		3	0	0	0	0	1	0
Smoke-Free Recovery	HBSV5 (EQ5D)	79556	1206	559b1774-2d58-489e-9867-02e386948896		24/11/2015	10:42:16	No	1	2	2-Dec-62		4	2	1		4	2284	3	3	2		2	0	0	0	0	1	0
Smoke-Free Recovery	HBSV5 (EQ5D)	79557	1207	55a04146-5cf8-4dea-9be5-34a386948896		24/11/2015	10:52:32	No	1	1	21-Sep-90		1	1	1		4	2333	4	3	1		2	0	0	0	0	1	0	1		30	13	3	50	1	1	1-Jul-15	8	5=Nicotine Replacement Therapy (NRT) (gum, patches, inhaler, lozenge, spray) brought without a prescription (e.g. from the supermarket or chemist)|6=Self-help book or brochure|4=Nicotine Replacement Therapy (NRT) (gum, patches, inhaler, lozenge, spray) recommended by a doctor|3=A stop-smoking medication prescribed by a doctor called Varenicline or Champix|2=Stop-smoking medication prescribed by a…	1	0	0	0	0	0	0	0	0
Smoke-Free Recovery	HBSV5 (EQ5D)	79558	1208	55a041c8-5d98-48de-bfb3-34a386948896		24/11/2015	11:07:09	No	1	1	15-Oct-93		4	2	1		1	2440	4	6	2		6	0	0	0	0	0	1
Smoke-Free Recovery	HBSV5 (EQ5D)	79562	2074	5653d876-e2e4-424f-90eb-296786948896		24/11/2015	14:26:05	Yes	2	2	20-Jun-48		4	2	2	greece	4	2165	5	2	2		2	0	0	0	0	0	1
Smoke-Free Recovery	HBSV5 (EQ5D)	79564	1209	55a0441d-f81c-4261-a7e5-34a386948896		25/11/2015	10:39:32	No	1	2	28-Oct-45		1	1	1		4	2280	5	3	2		2	0	0	0	0	1	0	2		30	17	3	120	1	0	6-Nov-13	14	7=Alternative therapies such as herbal or natural remedies, hypnosis, relaxation or accupuncture|8=Group counselling|4=Nicotine Replacement Therapy (NRT) (gum, patches, inhaler, lozenge, spray) recommended by a doctor|2=Stop-smoking medication prescribed by a doctor called Zyban, Prexaton or Bupropion|10=Telephone support (like Quitline)|3=A stop-smoking medication prescribed by a doctor called V…	1	0	0	0	0	0	0	0	0
Smoke-Free Recovery	HBSV5 (EQ5D)	79566	1210	55a0462c-6138-47a6-a114-606486948896		25/11/2015	10:55:45	No	1	1	9-Oct-66		4	2	1		4	2300	3	6	1		5	0	0	0	0	0	1
Smoke-Free Recovery	HBSV5 (EQ5D)	79567	1211	55a1b337-1e74-4ed3-9bf0-04c886948896		25/11/2015	11:21:21	No	1	1	12-Nov-61		4	1	1		4	2324	1	5	1		6	0	0	0	0	0	1
Smoke-Free Recovery	HBSV5 (EQ5D)	79568	1212	55a1b3dd-e9e4-45e3-8cc5-04c586948896		25/11/2015	11:34:42	No	1	1	31-Oct-80		1	1	1		4	2285	2	5	1		5	1	0	0	0	0	0	1		15	20	3	100	1	1	1-Aug-15	31	5=Nicotine Replacement Therapy (NRT) (gum, patches, inhaler, lozenge, spray) brought without a prescription (e.g. from the supermarket or chemist)|7=Alternative therapies such as herbal or natural remedies, hypnosis, relaxation or accupuncture|2=Stop-smoking medication prescribed by a doctor called Zyban, Prexaton or Bupropion|10=Telephone support (like Quitline)|9=Internet support|8=Group counse…	1	0	0	0	0	0	0	0	0
Smoke-Free Recovery	HBSV5 (EQ5D)	79570	1213	55a1b56d-f92c-4135-a487-04c486948896		25/11/2015	11:58:25	No	1	2	23-Mar-51		1	1	2	Scotland	4	2285	3	6	2		2	0	0	0	0	1	0	1		15	16	3	130	1	0	8-Feb-95	7	7=Alternative therapies such as herbal or natural remedies, hypnosis, relaxation or accupuncture|3=A stop-smoking medication prescribed by a doctor called Varenicline or Champix|2=Stop-smoking medication prescribed by a doctor called Zyban, Prexaton or Bupropion|5=Nicotine Replacement Therapy (NRT) (gum, patches, inhaler, lozenge, spray) brought without a prescription (e.g. from the supermarket o…	1	0	0	0	0	0	0	0	0
Smoke-Free Recovery	HBSV5 (EQ5D)	79572	1214	55a1b865-5c24-4a64-a53e-04c586948896		25/11/2015	13:17:10	No	1	2	1-Oct-73		4	2	1		4	2290	2	5	3		6	1	0	0	0	0	0
Smoke-Free Recovery	HBSV5 (EQ5D)	79574	1215	55a1b91c-02e8-4494-8fc2-04c586948896		25/11/2015	13:31:13	No	1	2	11-Aug-44		4	2	2	Canada	4	2290	1	6	2		2	0	0	0	0	1	0
Smoke-Free Recovery	HBSV5 (EQ5D)	79576	1216	55a1be83-6ec4-494c-8fb6-04c286948896		25/11/2015	14:05:47	No	1	1	27-Nov-15		4	2	1		4	2322	4	5	1		6	0	0	0	0	0	1
Smoke-Free Recovery	HBSV5 (EQ5D)	79583	1217	56564b55-686c-4b75-aa3c-692386948896		26/11/2015	10:59:18	No	1	1	9-Jun-46		4	1	1		4	2295	5	6	4		6	1	0	0	0	0	0
Smoke-Free Recovery	HBSV5 (EQ5D)	79585	1218	565652ba-a0f8-4a41-81d8-694286948896		26/11/2015	11:30:50	No	1	1	21-Aug-56		4	1	1		4	2323	1	5	1		5	1	0	0	0	0	0
Smoke-Free Recovery	HBSV5 (EQ5D)	79605	1219	56579010-fbec-4875-b1a9-432786948896		27/11/2015	10:04:49	Yes	1	2	5-Mar-61		4	1	1		4	2304	1	5	1		3	0	1	0	0	0	0
Smoke-Free Recovery	HBSV5 (EQ5D)	79606	1220	5657910a-34a8-448f-99bc-432786948896		27/11/2015	10:08:58	No	1	2	21-Jan-54		4	2	1		4	2304	1	3	2		2	1	0	0	0	0	0
Smoke-Free Recovery	HBSV5 (EQ5D)	79610	1221	56579a28-7b10-4c3f-ab90-432786948896		27/11/2015	10:47:52	No	1	1	5-Mar-93		1	1	1		4	2335	2	5	1		6	0	0	0	0	0	1	2		15	13	2	50	1	0	6-Nov-13	4	1=Own will-power, no help|6=Self-help book or brochure|10=Telephone support (like Quitline)|2=Stop-smoking medication prescribed by a doctor called Zyban, Prexaton or Bupropion|3=A stop-smoking medication prescribed by a doctor called Varenicline or Champix|11=Going to see a GP|7=Alternative therapies such as herbal or natural remedies, hypnosis, relaxation or accupuncture|4=Nicotine Replacement …	1	0	0	0	0	0	0	0	0
Smoke-Free Recovery	HBSV5 (EQ5D)	79616	2075	5657e677-b790-406d-9d47-1d2d86948896		27/11/2015	16:14:48	Yes	2	2	14-Oct-90		4	2	2	iraq	4	2170	4	5	5	Not sure	6	0	0	0	0	0	1
Smoke-Free Recovery	HBSV5 (EQ5D)	79619	2076	565911e1-d86c-415a-8eb5-1b8986948896		28/11/2015	13:33:15	No	2	1	9-May-15		2	1	1		4	2175	1	4	1		6	0	0	0	0	0	1	1		2	25	0	60	2
Smoke-Free Recovery	HBSV5 (EQ5D)	79620	1222	565a5127-354c-4862-b84e-247186948896		29/11/2015	12:13:12	No	1	2	11-Mar-48		1	1	1		4	2325	5	3	2		2	0	0	0	1	0	0	1		20	18	3	120	1	0	28-Nov-15	0	9=Internet support|5=Nicotine Replacement Therapy (NRT) (gum, patches, inhaler, lozenge, spray) brought without a prescription (e.g. from the supermarket or chemist)|4=Nicotine Replacement Therapy (NRT) (gum, patches, inhaler, lozenge, spray) recommended by a doctor|2=Stop-smoking medication prescribed by a doctor called Zyban, Prexaton or Bupropion|10=Telephone support (like Quitline)|1=Own will…	0	0	0	0	0	0	0	0	0
Smoke-Free Recovery	HBSV5 (EQ5D)	79621	1223	565a53de-9414-4471-ba60-246d86948896		29/11/2015	12:24:47	No	1	2	21-Nov-40		4	1	1		4	2240	5	5	2		2	1	0	0	0	0	0
Smoke-Free Recovery	HBSV5 (EQ5D)	79624	1224	565a5d12-b07c-4e61-8590-246b86948896		29/11/2015	13:04:03	No	1	2	17-Dec-46		4	2	1		4	2280	1	3	2		3	0	0	0	1	0	0
Smoke-Free Recovery	HBSV5 (EQ5D)	79626	1225	565a6298-11f0-46fd-bb39-246a86948896		29/11/2015	13:27:37	No	1	1	19-Feb-50		4	2	1		4	2852	1	5	1		6	1	0	0	0	0	0
Smoke-Free Recovery	HBSV5 (EQ5D)	79628	1226	565a663f-44c4-4598-8b05-246a86948896		29/11/2015	13:43:11	No	1	1	21-Mar-88		1	1	1		4	2305	4	4	2		2	0	0	0	0	1	0	2		25	23	3	30	2
Smoke-Free Recovery	HBSV5 (EQ5D)	79630	1227	565a6af9-7698-4817-aedb-246b86948896		29/11/2015	14:03:22	No	1	1	26-Feb-80		4	2	1		4	2261	1	5	1		4	0	0	0	0	0	1
Smoke-Free Recovery	HBSV5 (EQ5D)	79633	1228	565b79da-2794-4b6c-98ff-20f186948896		30/11/2015	09:19:06	No	1	1	15-Aug-68		4	1	1		4	2250	2	5	1		3	1	0	0	0	0	0
Smoke-Free Recovery	HBSV5 (EQ5D)	79634	1229	565b7e8a-52e0-4358-8608-20f086948896		30/11/2015	09:39:07	No	1	1	24-Apr-53		4	1	2	Serbia	4	2333	4	6	1		2	0	0	0	0	0	1
Smoke-Free Recovery	HBSV5 (EQ5D)	79637	1230	565b876e-def0-45f4-b7e3-0be586948896		30/11/2015	10:17:03	No	1	1	17-Mar-63		4	1	2	Scotland	4	2761	1	3	1		6	1	0	0	0	0	0
Smoke-Free Recovery	HBSV5 (EQ5D)	79641	1231	565b917a-f2c4-4d45-9bfc-0bdc86948896		30/11/2015	10:59:55	No	1	1	12-Jun-96		4	2	1		4	2446	4	5	3		1	1	0	0	0	0	0
Smoke-Free Recovery	HBSV5 (EQ5D)	79643	1232	565b941e-43a8-4118-a82a-0bdb86948896		30/11/2015	11:11:10	No	1	1	29-Nov-91		4	2	1		4	2289	2	3	1		3	0	0	0	0	0	1
Smoke-Free Recovery	HBSV5 (EQ5D)	79645	1233	565b973f-bb70-40b4-8c33-68e686948896		30/11/2015	11:24:31	No	1	1	8-Oct-87		1	1	1		4	2287	4	5	1		3	0	0	0	0	0	1	1		13	16	2	90	2
Smoke-Free Recovery	HBSV5 (EQ5D)	79647	1234	54b73efe-ad94-46fe-a26d-454286948896		30/11/2015	11:41:14	No	1	1	2-Apr-40		4	1	1		4	2287	1	5	1		6	1	0	0	0	0	0
Smoke-Free Recovery	HBSV5 (EQ5D)	79661	2077	565d0d8c-a28c-4af8-9886-798d86948896		1/12/2015	14:03:52	No	2	1	15-Oct-15		4	1	2	france	4	2131	2	5	1		6	0	0	0	0	0	1
Smoke-Free Recovery	HBSV5 (EQ5D)	79662	1235	565e13da-7a6c-498b-b941-691886948896		2/12/2015	08:40:43	No	1	1	1-Jun-90		1	1	1		1	2354	4	4	1		3	0	0	0	0	0	1	1		5	19	2	30	2
Smoke-Free Recovery	HBSV5 (EQ5D)	79664	1236	565e18e0-e490-46a3-a125-6e4386948896		2/12/2015	09:02:09	No	1	1	23-May-51		4	1	1		4	2450	4	3	5	Farmer	6	0	0	0	0	0	1
Smoke-Free Recovery	HBSV5 (EQ5D)	79667	annie	565e3390-f858-46da-ae9e-579986948896		2/12/2015	10:58:04	Yes	2	2	1-Dec-15		4	2	1		4	0	1	1	1		3	0	0	0	0	0	1
Smoke-Free Recovery	HBSV5 (EQ5D)	79668	1237	565e3aa3-e474-4e95-b758-79b286948896		2/12/2015	11:26:12	No	1	1	28-Nov-90		4	1	1		4	2286	2	4	1		6	0	0	0	0	0	1
Smoke-Free Recovery	HBSV5 (EQ5D)	79669	1239	565e3c6d-3fa8-4bf8-8864-69e186948896		2/12/2015	11:33:50	No	1	1	12-Jul-91		4	2	1		4	2292	4	5	1		3	0	1	0	0	0	0
Smoke-Free Recovery	HBSV5 (EQ5D)	79670	1238	565e3eaf-9610-4b74-893f-6e4386948896		2/12/2015	11:43:28	No	1	2	13-May-38		4	1	1		4	2281	5	3	2		2	0	0	0	0	1	0
Smoke-Free Recovery	HBSV5 (EQ5D)	79673	1240	565e464e-9984-403a-b654-56e386948896		2/12/2015	12:15:59	No	1	1	4-Oct-61		4	2	1		4	2324	4	5	1		3	1	0	0	0	0	0
Smoke-Free Recovery	HBSV5 (EQ5D)	79679	2078	565e63fd-1160-43d1-8f66-79b286948896		2/12/2015	14:28:24	Yes	2	1	15-Oct-66		4	1	2	France	4	0	2	3	1		6	0	0	0	0	0	1
Smoke-Free Recovery	HBSV5 (EQ5D)	79681	2079	565e6ac7-69fc-46e1-bb95-6d6086948896		2/12/2015	14:57:26	Yes	2	1	6-Sep-49		4	2	2	Iran	4	2170	4	5	2		6	0	0	0	0	0	1
Smoke-Free Recovery	HBSV5 (EQ5D)	79688	2080	565f9681-9220-4466-921a-60ea86948896		3/12/2015	12:15:24	Yes	2	1	23-Oct-61		4	2	1		4	2567	2	5	1		4	1	0	0	0	0	0
Smoke-Free Recovery	HBSV5 (EQ5D)	79703	2082	56638656-863c-41ca-a780-30da86948896		7/12/2015	10:54:26	Yes	2	1	12-Feb-90		4	2	1		4	2560	2	4	2		6	0	0	0	0	1	0
Smoke-Free Recovery	HBSV5 (EQ5D)	79704	1243	5664ce82-a640-44ae-901b-1a7586948896		7/12/2015	11:10:42	No	1	1	2-Jun-47		4	2	1		4	2297	1	6	1		3	1	0	0	0	0	0
Smoke-Free Recovery	HBSV5 (EQ5D)	79706	1242	5664d408-49c4-4ea8-9b94-1a7586948896		7/12/2015	11:34:17	No	1	2	12-Jan-39		4	2	1		4	2289	1	3	2		3	0	0	0	0	1	0
Smoke-Free Recovery	HBSV5 (EQ5D)	79709	1241	5664d749-990c-4ea3-9c9c-1a9286948896		7/12/2015	11:48:10	No	1	2	7-Aug-47		4	2	1		4	2283	3	3	2		2	0	0	0	0	1	0
Smoke-Free Recovery	HBSV5 (EQ5D)	79711	1244	5664e075-d58c-4d0c-a881-1a7386948896		7/12/2015	12:27:18	No	1	1	11-Aug-69		4	2	1		4	2283	1	3	1		6	0	0	0	0	0	1
Smoke-Free Recovery	HBSV5 (EQ5D)	79714	1245	5664e515-9dc8-4ba9-976a-1a9386948896		7/12/2015	12:47:02	No	1	1	24-Feb-83		4	2	1		4	2107	1	3	1		6	1	0	0	0	0	0
Smoke-Free Recovery	HBSV5 (EQ5D)	79716	1246	5664e8bc-d144-4e3d-a0f6-1a7386948896		7/12/2015	13:02:37	No	1	1	11-Jun-71		4	2	1		4	2318	1	5	1		5	0	0	0	0	0	1
Smoke-Free Recovery	HBSV5 (EQ5D)	79720	2083	56663e7d-4d14-4588-b37d-09a186948896		8/12/2015	13:22:51	Yes	2	1	4-Sep-90		4	2	1		4	2219	4	4	1		6	0	0	0	0	0	1
Smoke-Free Recovery	HBSV5 (EQ5D)	79722	2084	566641d2-3430-44b9-8178-74cb86948896		8/12/2015	13:38:00	Yes	2	1	31-Aug-56		4	2	1		4	2580	1	3	1		6	1	0	0	0	0	0
Smoke-Free Recovery	HBSV5 (EQ5D)	79737	2085	566a4747-25b0-4f84-adac-742b86948896		11/12/2015	14:49:10	Yes	2	1	16-Jun-37		4	1	1		4	2165	1	5	2		6	0	1	0	0	0	0
Smoke-Free Recovery	HBSV5 (EQ5D)	79745	2086	566cbb2b-31c0-4d8f-b14e-1ab086948896		13/12/2015	11:28:14	No	2	1	29-Jun-15		1	1	1		4	0	1	3	1		6	1	0	0	0	0	0	1		20	12	2	80	1	0	11-Dec-12	20	11=Going to see a GP|10=Telephone support (like Quitline)|3=A stop-smoking medication prescribed by a doctor called Varenicline or Champix|2=Stop-smoking medication prescribed by a doctor called Zyban, Prexaton or Bupropion|8=Group counselling|9=Internet support|4=Nicotine Replacement Therapy (NRT) (gum, patches, inhaler, lozenge, spray) recommended by a doctor|7=Alternative therapies such as her…	1	0	0	0	0	0	0	0	0
Smoke-Free Recovery	HBSV5 (EQ5D)	79763	2087	5670c995-1c3c-4306-8515-14e986948896		16/12/2015	13:18:52	Yes	2	2	6-Oct-51		4	2	1		4	2168	1	3	2		6	0	0	0	0	0	1
Smoke-Free Recovery	HBSV5 (EQ5D)	79769	2088	5673757a-5f44-4bd4-82f1-16bb86948896		18/12/2015	13:56:40	Yes	2	1	4-May-15		1	3	2	Vietnam	4	0	1	4	1		2	0	0	0	0	0	1	1		10	20	1	70	2
Smoke-Free Recovery	HBSV5 (EQ5D)	79771	2089	56737d51-1460-4af8-a1a7-186986948896		18/12/2015	14:32:48	Yes	2	2	20-Jul-89		4	1	1		4	2567	1	5	1		5	1	0	0	0	0	0
Smoke-Free Recovery	HBSV5 (EQ5D)	79774	2090	5674a9b3-4b60-4141-be2b-627586948896		19/12/2015	11:57:32	Yes	2	1	26-Apr-58		4	2	2	India	4	0	3	6	1		4	0	0	0	0	0	1
Smoke-Free Recovery	HBSV5 (EQ5D)	79776	2091	56777235-28c0-4f11-a66d-3d8c86948896		21/12/2015	14:32:33	No	2	1	27-Jul-62		1	1	1		4	2179	4	3	1		3	0	0	0	0	0	1	1		20	14	1	150	1	0	21-Dec-05	14	5=Nicotine Replacement Therapy (NRT) (gum, patches, inhaler, lozenge, spray) brought without a prescription (e.g. from the supermarket or chemist)|4=Nicotine Replacement Therapy (NRT) (gum, patches, inhaler, lozenge, spray) recommended by a doctor|6=Self-help book or brochure|2=Stop-smoking medication prescribed by a doctor called Zyban, Prexaton or Bupropion|7=Alternative therapies such as herba…	1	0	0	0	0	0	0	0	0
Smoke-Free Recovery	HBSV5 (EQ5D)	79778	2092	56777b03-f6c0-4677-9c21-3d8886948896		21/12/2015	15:09:36	No	2	2	31-Aug-43		4	2	1		4	2168	2	3	4		4	0	0	0	0	0	1
Smoke-Free Recovery	HBSV5 (EQ5D)	79790	2093	568c5fb1-0dec-4e31-bd9c-3de786948896		6/01/2016	11:30:36	No	2	1	9-Sep-58		1	1	1		4	2219	3	5	2		3	0	0	0	0	1	0	1		10	18	1	75	2
Smoke-Free Recovery	HBSV5 (EQ5D)	79794	2094	568f2835-48c8-4040-a215-669086948896		8/01/2016	14:14:46	Yes	2	1	21-Jul-49		4	2	1		4	2060	3	6	1		5	0	1	0	0	0	0
Smoke-Free Recovery	HBSV5 (EQ5D)	79796	2095	56907397-69b0-4d16-af70-35f186948896		9/01/2016	13:48:01	No	2	2	24-Jan-37		4	3	1		4	2570	3	4	2		6	0	0	0	0	1	0
Smoke-Free Recovery	HBSV5 (EQ5D)	79798	2096	569313ee-4a50-4d21-926b-2c8286948896		11/01/2016	13:32:53	Yes	2	2	30-Oct-45		4	2	1		4	2177	3	3	2		6	1	0	0	0	0	0
Smoke-Free Recovery	HBSV5 (EQ5D)	79800	2098	5696d8c4-1694-4e17-a62c-5dc786948896		14/01/2016	10:09:55	No	2	2	25-Jun-75		1	1	2	new zealand	4	2171	1	4	2		3	0	0	0	0	1	0	1		5	18	0	50	1	1	16-Dec-15	4	4=Nicotine Replacement Therapy (NRT) (gum, patches, inhaler, lozenge, spray) recommended by a doctor|2=Stop-smoking medication prescribed by a doctor called Zyban, Prexaton or Bupropion|7=Alternative therapies such as herbal or natural remedies, hypnosis, relaxation or accupuncture|5=Nicotine Replacement Therapy (NRT) (gum, patches, inhaler, lozenge, spray) brought without a prescription (e.g. fr…	1	0	0	0	0	0	0	0	0
Smoke-Free Recovery	HBSV5 (EQ5D)	79805	2099	5699aaa7-c5b0-46e8-892d-18d786948896		16/01/2016	13:29:36	No	2	1	1-Jan-47		4	1	2	Uk	4	2570	1	3	1		6	1	0	0	0	0	0
Smoke-Free Recovery	HBSV5 (EQ5D)	79807	1247	569c4b42-812c-446a-b4bb-1a5486948896		18/01/2016	13:17:38	No	1	1	12-Dec-48		4	1	1		4	2283	1	4	4		6	1	0	0	0	0	0
Smoke-Free Recovery	HBSV5 (EQ5D)	79808	1248	569c4ffd-9680-40b9-8793-1a5286948896		18/01/2016	13:37:50	No	1	2	3-Nov-37		4	2	1		4	2289	1	3	2		3	1	0	0	0	0	0
Smoke-Free Recovery	HBSV5 (EQ5D)	79809	1249	569c5e8f-f4b4-48f7-a25c-1a5486948896		18/01/2016	14:39:59	No	1	1	20-Jul-58		4	2	2	Romania	4	2284	4	5	1		6	0	0	0	0	0	1
Smoke-Free Recovery	HBSV5 (EQ5D)	79814	1250	569d80dd-d89c-46c3-afbb-53e386948896		19/01/2016	11:22:44	Yes	1	1	27-Nov-91		4	2	1		4	2350	2	5	1		2	0	0	1	0	0	0
Smoke-Free Recovery	HBSV5 (EQ5D)	79816	1252	569d85c0-dbc4-44d0-b53e-598586948896		19/01/2016	11:44:42	Yes	1	2	28-Aug-87		4	2	1		4	2259	1	6	3		4	0	0	1	0	0	0
Smoke-Free Recovery	HBSV5 (EQ5D)	79817	1251	569d8700-a630-404c-9ddb-594586948896		19/01/2016	11:44:49	No	1	2	4-May-67		4	1	1		4	2298	2	6	1		4	1	0	0	0	0	0
Smoke-Free Recovery	HBSV5 (EQ5D)	79820	2100	56a06d3b-5cf0-4f04-84eb-1e2d86948896		21/01/2016	16:33:26	No	2	1	5-Nov-84		1	1	1		4	2168	3	5	1		6	0	0	0	0	0	1	1		20	12	1	160	1	0	15-Jan-14	150	10=Telephone support (like Quitline)|8=Group counselling|9=Internet support|1=Own will-power, no help|3=A stop-smoking medication prescribed by a doctor called Varenicline or Champix|4=Nicotine Replacement Therapy (NRT) (gum, patches, inhaler, lozenge, spray) recommended by a doctor|5=Nicotine Replacement Therapy (NRT) (gum, patches, inhaler, lozenge, spray) brought without a prescription (e.g. f…	1	0	0	0	0	0	0	0	0
Smoke-Free Recovery	HBSV5 (EQ5D)	79824	2101	56a1b374-a9c0-416e-98c0-4c5486948896		22/01/2016	15:47:18	Yes	2	1	26-Jul-35		4	2	1		4	0	1	2	2		6	0	0	0	0	1	0
Smoke-Free Recovery	HBSV5 (EQ5D)	79826	2102	56a2c8fb-d080-45c0-ade3-6da786948896		23/01/2016	11:29:38	Yes	2	1	3-Mar-16		4	2	1		4	2170	1	6	1		4	1	0	0	0	0	0
Smoke-Free Recovery	HBSV5 (EQ5D)	79829	1253	56a9911b-cf60-4ea5-a257-14b386948896		28/01/2016	14:55:08	No	1	2	25-Apr-47		4	2	1		4	2315	1	6	1		5	1	0	0	0	0	0
Smoke-Free Recovery	HBSV5 (EQ5D)	79831	1254	56a99724-4380-4feb-bc10-75a486948896		28/01/2016	15:20:52	No	1	1	28-Aug-49		4	2	1		4	2450	4	5	1		3	0	0	0	0	0	1
Smoke-Free Recovery	HBSV5 (EQ5D)	79835	2103	56ad7541-dc70-4419-9f25-05be86948896		31/01/2016	13:46:49	No	2	1	21-Jan-79		4	2	1		4	0	1	4	1		6	0	0	0	0	0	1
Smoke-Free Recovery	HBSV5 (EQ5D)	79837	2104	56ad7b3e-cfa8-41bf-baee-05bd86948896		31/01/2016	14:11:54	No	2	2	27-Jun-52		4	1	1		4	0	2	3	3		6	1	0	0	0	0	0
Smoke-Free Recovery	HBSV5 (EQ5D)	79839	2105	56aea9f8-ff9c-4b56-ada2-6b1486948896		1/02/2016	11:45:24	Yes	2	1	13-Apr-56		4	1	2	Iraq	4	2176	1	3	5	unemployed	6	0	0	0	0	0	1
Smoke-Free Recovery	HBSV5 (EQ5D)	79840	1255	56aebedb-94ec-4dc5-820f-742986948896		1/02/2016	13:11:40	Yes	1	1	21-Mar-82		4	1	1		4	2390	1	4	1		6	1	0	0	0	0	0
Smoke-Free Recovery	HBSV5 (EQ5D)	79841	1256	56aec202-10ec-4d2a-8827-591286948896		1/02/2016	13:25:06	No	1	1	18-Mar-77		1	1	1		4	2352	1	5	1		6	1	0	0	0	0	0	1		50	15	2	200	1	0	1-Sep-11	1	10=Telephone support (like Quitline)|7=Alternative therapies such as herbal or natural remedies, hypnosis, relaxation or accupuncture|11=Going to see a GP|6=Self-help book or brochure|5=Nicotine Replacement Therapy (NRT) (gum, patches, inhaler, lozenge, spray) brought without a prescription (e.g. from the supermarket or chemist)|3=A stop-smoking medication prescribed by a doctor called Vareniclin…	0	0	0	1	0	0	0	0	0
Smoke-Free Recovery	HBSV5 (EQ5D)	79842	1258	56aec6e1-4fb4-49c1-9604-6b1286948896		1/02/2016	13:45:54	No	1	2	7-Oct-77		2	1	1		4	2323	4	5	1		6	1	0	0	0	0	0	1		4	20	0	25	1	1	26-Jan-16	500	3=A stop-smoking medication prescribed by a doctor called Varenicline or Champix|11=Going to see a GP|6=Self-help book or brochure|4=Nicotine Replacement Therapy (NRT) (gum, patches, inhaler, lozenge, spray) recommended by a doctor|2=Stop-smoking medication prescribed by a doctor called Zyban, Prexaton or Bupropion|1=Own will-power, no help|8=Group counselling|9=Internet support|5=Nicotine Replac…	1	0	0	0	0	0	0	0	0
Smoke-Free Recovery	HBSV5 (EQ5D)	79843	1257	56aecb75-8b9c-42d4-8d86-6b1286948896		1/02/2016	14:05:25	No	1	1	10-May-83		1	1	1		4	2359	2	4	1		6	0	0	0	0	0	1	2		50	14	2	100	2
Smoke-Free Recovery	HBSV5 (EQ5D)	79845	1259	56aed167-550c-49ed-8cf3-742986948896		1/02/2016	14:30:48	No	1	2	4-Dec-55		4	1	1		4	2287	4	6	1		6	0	0	0	0	0	1
Smoke-Free Recovery	HBSV5 (EQ5D)	79846	1260	56aed68d-6c24-4d0a-84cf-6b1586948896		1/02/2016	14:52:46	No	1	2	8-Oct-36		4	2	1		4	2324	5	5	2		6	0	0	0	0	1	0
Smoke-Free Recovery	HBSV5 (EQ5D)	79853	1261	56b00840-a030-451d-a188-47eb86948896		2/02/2016	12:37:05	No	1	2	30-Apr-63		4	1	2	Chilli	4	2360	3	4	1		6	1	0	0	0	0	0
Smoke-Free Recovery	HBSV5 (EQ5D)	79855	1262	56b00d7f-3450-447e-b268-3cdb86948896		2/02/2016	12:59:27	No	1	2	24-Jan-62		3	1	1		4	2289	4	6	1		6	0	0	0	0	0	1	1		5	19	0	0	1	0	1-Feb-12	105	9=Internet support|10=Telephone support (like Quitline)|2=Stop-smoking medication prescribed by a doctor called Zyban, Prexaton or Bupropion|1=Own will-power, no help|8=Group counselling|4=Nicotine Replacement Therapy (NRT) (gum, patches, inhaler, lozenge, spray) recommended by a doctor|3=A stop-smoking medication prescribed by a doctor called Varenicline or Champix|6=Self-help book or brochure|1…	1	0	0	0	0	0	0	0	0
Smoke-Free Recovery	HBSV5 (EQ5D)	79857	1263	56b013e1-5fe4-48b4-9086-4f8f86948896		2/02/2016	13:26:41	No	1	2	12-Jul-73		4	2	1		4	2307	4	3	2		6	1	0	0	0	0	0
Smoke-Free Recovery	HBSV5 (EQ5D)	79859	1264	56b016f6-432c-4c30-af19-665286948896		2/02/2016	13:39:50	No	1	1	17-Jun-97		4	2	1		1	2324	2	3	2		3	0	0	0	0	1	0
Smoke-Free Recovery	HBSV5 (EQ5D)	79861	1265	56b01cca-cf88-4bbb-9f07-4f8f86948896		2/02/2016	14:04:43	No	1	1	11-Mar-71		4	2	1		4	2298	1	6	1		5	1	0	0	0	0	0
Smoke-Free Recovery	HBSV5 (EQ5D)	79863	1266	56b02276-776c-4356-ac50-4d3286948896		2/02/2016	14:28:55	No	1	1	27-Jul-88		1	1	1		4	2403	4	5	1		6	0	0	0	0	0	1	2		15	14	0	150	1	1	1-Feb-15	300	11=Going to see a GP|6=Self-help book or brochure|2=Stop-smoking medication prescribed by a doctor called Zyban, Prexaton or Bupropion|9=Internet support|4=Nicotine Replacement Therapy (NRT) (gum, patches, inhaler, lozenge, spray) recommended by a doctor|1=Own will-power, no help|7=Alternative therapies such as herbal or natural remedies, hypnosis, relaxation or accupuncture|3=A stop-smoking medi…	1	0	0	0	0	0	0	0	0
Smoke-Free Recovery	HBSV5 (EQ5D)	79866	2106	56b04c12-7488-47be-941f-052986948896		2/02/2016	17:31:44	Yes	2	2	9-Jul-56		4	1	2	malta	4	2176	1	4	3		6	0	0	0	0	1	0
Smoke-Free Recovery	HBSV5 (EQ5D)	79868	2107	56b17ee6-24b4-4254-aea2-3c1386948896		3/02/2016	15:19:22	Yes	2	1	5-Jul-82		4	1	1		4	2144	1	6	5	Self employed	2	0	0	0	0	1	0
Smoke-Free Recovery	HBSV5 (EQ5D)	79876	1267	56b3f88a-d3e0-4128-a3db-51bc86948896		5/02/2016	12:19:07	Yes	1	2	2-Mar-88		4	1	2	USA	4	2291	4	6	1		3	0	0	1	0	0	0
Smoke-Free Recovery	HBSV5 (EQ5D)	79880	2108	56b6a9ea-74f0-4f61-91f7-736b86948896		7/02/2016	13:21:18	No	2	2	5-Jul-35		4	1	2	Ireland	4	0	3	3	2		1	0	0	0	0	1	0
Smoke-Free Recovery	HBSV5 (EQ5D)	79886	2109	56bab39c-e38c-4c8c-a2a5-668686948896		16/02/2016	14:44:19	Yes	2	1	2-Oct-62		4	1	1		4	2566	1	3	2		6	0	0	0	0	0	1
Smoke-Free Recovery	HBSV5 (EQ5D)	79893	2110	56c686a3-0ac0-4c96-bda1-34e386948896		19/02/2016	14:08:04	Yes	2	2	15-Apr-37		4	2	2	India	4	2165	1	4	4		6	0	0	0	0	0	1
Smoke-Free Recovery	HBSV5 (EQ5D)	79895	2111	56c69902-1ebc-4871-b38a-320a86948896		19/02/2016	15:28:00	Yes	2	1	20-Mar-57		1	1	1		4	2790	3	5	1		4	0	0	0	0	0	1	1		10	15	0	100	1	3	13-Jan-16	4	6=Self-help book or brochure|2=Stop-smoking medication prescribed by a doctor called Zyban, Prexaton or Bupropion|9=Internet support|1=Own will-power, no help|10=Telephone support (like Quitline)|8=Group counselling|7=Alternative therapies such as herbal or natural remedies, hypnosis, relaxation or accupuncture|3=A stop-smoking medication prescribed by a doctor called Varenicline or Champix|5=Nic…	1	0	0	0	0	0	0	0	0
Smoke-Free Recovery	HBSV5 (EQ5D)	79899	2112	56ca9111-8588-44dd-ac9b-2bde86948896		22/02/2016	15:42:07	Yes	2	2	16-Oct-70		4	1	1		4	2500	2	5	1		3	0	0	0	0	0	1
Smoke-Free Recovery	HBSV5 (EQ5D)	79901	2114	56cb9906-5184-447b-8b4a-52a686948896		23/02/2016	10:28:46	Yes	2	1	14-Jul-95		4	2	1		4	2170	4	4	1		6	0	0	0	0	1	0
Smoke-Free Recovery	HBSV5 (EQ5D)	79904	2115	56cd1f96-17d0-4ea5-91b7-461c86948896		24/02/2016	14:35:27	Yes	2	1	25-May-36		4	1	2	Greece	4	2770	1	2	2		3	0	0	0	0	0	1
Smoke-Free Recovery	HBSV5 (EQ5D)	79906	2116	56cd2b99-3abc-4247-8a4a-46df86948896		24/02/2016	15:06:02	No	2	2	24-Oct-89		1	1	1		4	2168	4	4	1		3	1	0	0	0	0	0	1		15	17	0	80	1	4	14-Jul-15	30	9=Internet support|8=Group counselling|11=Going to see a GP|4=Nicotine Replacement Therapy (NRT) (gum, patches, inhaler, lozenge, spray) recommended by a doctor|7=Alternative therapies such as herbal or natural remedies, hypnosis, relaxation or accupuncture|3=A stop-smoking medication prescribed by a doctor called Varenicline or Champix|1=Own will-power, no help|10=Telephone support (like Quitlin…	1	0	0	0	0	0	0	0	0
Smoke-Free Recovery	HBSV5 (EQ5D)	79909	2117	56ce6fcb-7c20-453c-8048-56e886948896		25/02/2016	14:09:26	Yes	2	2	26-Dec-54		4	2	1		4	2567	1	3	1		6	1	0	0	0	0	0
Smoke-Free Recovery	HBSV5 (EQ5D)	79914	2118	56d26713-f8bc-4058-8acb-35be86948896		29/02/2016	13:07:22	No	2	1	26-Mar-67		4	1	1		4	2168	1	3	1		3	0	0	0	0	0	1
Smoke-Free Recovery	HBSV5 (EQ5D)	79917	2119	56d501dd-eff4-451d-bf6c-76a886948896		1/03/2016	13:45:38	No	2	1	24-Oct-69		4	1	2	Chile	4	2168	2	5	1		4	0	1	0	0	0	0
Smoke-Free Recovery	HBSV5 (EQ5D)	79921	2120	56d50b38-522c-46cc-8136-230986948896		1/03/2016	14:25:09	No	2	1	5-Apr-49		4	1	1		4	3690	1	3	1		3	1	0	0	0	0	0
Smoke-Free Recovery	HBSV5 (EQ5D)	79927	2121	56d65c38-c4a4-4848-a6fd-79cc86948896		2/03/2016	14:27:19	Yes	2	1	8-Jan-71		4	2	1		1	2166	2	5	1		5	1	0	0	0	0	0
Smoke-Free Recovery	HBSV5 (EQ5D)	79936	2122	56d67340-ab08-4e6b-8988-230786948896		2/03/2016	16:04:36	Yes	2	2	17-Jan-58		4	1	1		4	2560	2	5	4		2	0	0	0	0	1	0
Smoke-Free Recovery	HBSV5 (EQ5D)	79938	2123	56d678c1-7fd8-4d55-874a-230686948896		2/03/2016	16:26:20	Yes	2	1	15-Jul-44		4	2	1		4	2530	5	5	2		2	1	0	0	0	0	0
Smoke-Free Recovery	HBSV5 (EQ5D)	79941	1268	56d76b10-b7a4-477d-b79e-773586948896		3/03/2016	09:37:05	No	1	1	1-Sep-95		1	1	1		4	2281	2	3	1		6	0	0	0	0	1	0	1		5	16	1	60	1	2	1-Feb-15	8	3=A stop-smoking medication prescribed by a doctor called Varenicline or Champix|11=Going to see a GP|6=Self-help book or brochure|5=Nicotine Replacement Therapy (NRT) (gum, patches, inhaler, lozenge, spray) brought without a prescription (e.g. from the supermarket or chemist)|9=Internet support|8=Group counselling|4=Nicotine Replacement Therapy (NRT) (gum, patches, inhaler, lozenge, spray) recom…	1	0	0	0	0	0	0	0	0
Smoke-Free Recovery	HBSV5 (EQ5D)	79943	1269	56d76bd0-bd18-4f04-8577-3b3386948896		3/03/2016	09:42:37	Yes	1	1	3-Mar-72		4	2	1		4	2290	2	3	1		2	0	0	0	0	0	1
Smoke-Free Recovery	HBSV5 (EQ5D)	79945	1270	56d76e7c-6d24-4060-be77-3b3486948896		3/03/2016	09:53:30	Yes	1	1	13-Nov-87		4	1	1		4	2347	4	5	1		3	0	0	0	0	0	1
Smoke-Free Recovery	HBSV5 (EQ5D)	79947	1271	56d77168-a9b0-48d2-9f32-773586948896		3/03/2016	10:05:53	Yes	1	1	29-Mar-16		4	2	1		1	2312	1	5	3		3	1	0	0	0	0	0
Smoke-Free Recovery	HBSV5 (EQ5D)	79950	1272	56d77635-965c-4f34-b3d6-3a9a86948896		3/03/2016	10:24:37	Yes	1	2	30-Jun-79		4	1	1		4	2282	1	5	1		4	1	0	0	0	0	0
Smoke-Free Recovery	HBSV5 (EQ5D)	79952	2124	56d7aa69-1cbc-46eb-af50-3ab986948896		3/03/2016	14:10:30	Yes	2	2	8-Jul-46		4	1	2	United States	4	2564	1	6	2		6	0	0	0	0	0	1
Smoke-Free Recovery	HBSV5 (EQ5D)	79954	2125	56d901a4-a9b4-4b9e-b583-5b8086948896		4/03/2016	14:38:33	Yes	2	2	23-Jun-61		1	1	1		4	2170	4	4	1		3	0	0	0	0	0	1	1		15	21	0	65	1	2	2-Dec-15	4	8=Group counselling|3=A stop-smoking medication prescribed by a doctor called Varenicline or Champix|7=Alternative therapies such as herbal or natural remedies, hypnosis, relaxation or accupuncture|4=Nicotine Replacement Therapy (NRT) (gum, patches, inhaler, lozenge, spray) recommended by a doctor|1=Own will-power, no help|9=Internet support|2=Stop-smoking medication prescribed by a doctor called…	1	0	0	0	0	0	0	0	0
Smoke-Free Recovery	HBSV5 (EQ5D)	79956	2126	56d908ad-58c4-4f0b-b6e8-5b1186948896		5/03/2016	12:00:19	No	2	1	5-Jul-16		1	1	2	England	4	2556	2	5	1		5	1	0	0	0	0	0	1		20	15	1	180	1	2	1-Jan-16	4	10=Telephone support (like Quitline)|6=Self-help book or brochure|11=Going to see a GP|1=Own will-power, no help|7=Alternative therapies such as herbal or natural remedies, hypnosis, relaxation or accupuncture|8=Group counselling|2=Stop-smoking medication prescribed by a doctor called Zyban, Prexaton or Bupropion|4=Nicotine Replacement Therapy (NRT) (gum, patches, inhaler, lozenge, spray) recomme…	0	0	1	0	1	0	0	0	0
Smoke-Free Recovery	HBSV5 (EQ5D)	79959	2127	56dcd772-1ad8-4444-ba4c-0f6586948896		7/03/2016	12:24:13	No	2	2	17-Jan-58		4	1	1		4	2560	2	5	4		3	0	0	0	0	1	0
Smoke-Free Recovery	HBSV5 (EQ5D)	79961	maryanne	56ddfeaa-5b00-465f-949e-393786948896		8/03/2016	09:42:44	Yes	1	2	9-Jul-74		4	2	1		4	0	1	3	2		4	0	0	0	0	0	1
Smoke-Free Recovery	HBSV5 (EQ5D)	79962	maryanne1	56de0692-9e78-434f-8c33-433686948896		8/03/2016	09:54:10	No	1	1	14-Mar-16		3	2	2	India	3	2300
Smoke-Free Recovery	HBSV5 (EQ5D)	79966	sam1	55a2eac0-1600-4188-9edc-046f86948896		8/03/2016	10:11:49	No	1
Smoke-Free Recovery	HBSV5 (EQ5D)	79968	1274	56de1182-58e0-4944-9a54-660486948896		8/03/2016	10:46:11	Yes	1	1	14-Aug-88		4	2	2	USA	4	2298	2	5	2		1	0	0	0	0	1	0
Smoke-Free Recovery	HBSV5 (EQ5D)	79970	1275	56de161c-31a0-4d51-a264-664086948896		8/03/2016	11:06:09	Yes	1	1	6-Sep-65		4	2	1		4	2119	1	6	1		5	1	0	0	0	0	0
Smoke-Free Recovery	HBSV5 (EQ5D)	79972	1276	56df4ff9-95ac-45d0-8a28-495286948896		9/03/2016	09:24:29	Yes	1	1	27-Mar-83		4	2	1		4	2262	1	6	1		4	0	0	0	0	0	1
Smoke-Free Recovery	HBSV5 (EQ5D)	79974	1277	56df5670-1fd8-402c-a9f0-3bbd86948896		9/03/2016	09:50:21	No	1	2	3-Sep-85		2	1	1		4	2280	4	3	2		2	0	0	0	0	0	1	1		2	16	0	20	2
Smoke-Free Recovery	HBSV5 (EQ5D)	79976	1278	56df58bc-d84c-44ad-8e7c-3bbd86948896		9/03/2016	10:00:37	No	1	2	17-Jan-48		1	1	1		4	2285	3	3	2		1	0	0	0	0	1	0	1		25	16	3	200	1	1	28-Feb-16	4	8=Group counselling|11=Going to see a GP|2=Stop-smoking medication prescribed by a doctor called Zyban, Prexaton or Bupropion|6=Self-help book or brochure|3=A stop-smoking medication prescribed by a doctor called Varenicline or Champix|5=Nicotine Replacement Therapy (NRT) (gum, patches, inhaler, lozenge, spray) brought without a prescription (e.g. from the supermarket or chemist)|1=Own will-power…	1	0	0	0	0	0	0	0	0
Smoke-Free Recovery	HBSV5 (EQ5D)	79978	2128	56dfa05c-6d40-48c6-a1e5-5e7d86948896		9/03/2016	15:04:12	No	2	1	3-Feb-95		1	1	1		1	2173	4	4	1		6	1	0	0	0	0	0	1		40	18	3	400	2
Smoke-Free Recovery	HBSV5 (EQ5D)	79980	1279	56e09b10-fcdc-463b-a2d2-6edc86948896		10/03/2016	08:55:46	No	1	1	22-Feb-54		4	2	1		4	2318	1	3	5	Handyman	2	0	1	0	0	0	0
Smoke-Free Recovery	HBSV5 (EQ5D)	79982	1280	56e09f83-1090-4c95-8e67-60a186948896		10/03/2016	09:15:35	Yes	1	1	20-Jan-59		4	1	1		4	2257	1	5	1		4	0	0	0	0	0	1
Smoke-Free Recovery	HBSV5 (EQ5D)	79984	1281	56e0a1eb-4304-4bfc-991e-628586948896		10/03/2016	09:25:11	No	1	1	25-Oct-64		4	1	1		4	0	2	3	1		2	0	0	0	0	0	1
Smoke-Free Recovery	HBSV5 (EQ5D)	79986	1282	56e0a7ce-996c-4438-82a1-1e2c86948896		10/03/2016	09:52:11	Yes	1	1	17-Feb-69		4	1	1		4	2319	2	5	1		2	0	0	0	0	1	0
Smoke-Free Recovery	HBSV5 (EQ5D)	79988	1283	56e0aa53-e764-4bdd-8e7a-37f386948896		10/03/2016	10:00:18	No	1	2	4-Dec-46		1	1	1		4	2259	1	5	5	Self employed	2	0	0	0	0	1	0	1		3	18	0	20	2
Smoke-Free Recovery	HBSV5 (EQ5D)	79990	1284	56e0ac3a-0720-453f-a1ea-359b86948896		10/03/2016	10:11:49	Yes	1	1	13-Oct-86		4	3	1		4	2285	1	5	1		5	0	0	0	0	0	1
Smoke-Free Recovery	HBSV5 (EQ5D)	79992	1285	56e0b449-47d4-463e-883f-37f386948896		10/03/2016	10:42:57	No	1	2	29-Jan-93		4	2	1		4	2322	2	6	1		3	0	1	0	0	0	0
Smoke-Free Recovery	HBSV5 (EQ5D)	79994	1286	56e0b62b-02dc-412f-96d8-1e2c86948896		10/03/2016	10:51:22	No	1	2	9-Oct-42		1	1	2	New Zealand	4	2324	1	3	5	Business	5	0	0	0	0	1	0	1		30	25	3	200	1	0	2-Mar-16	8	3=A stop-smoking medication prescribed by a doctor called Varenicline or Champix|5=Nicotine Replacement Therapy (NRT) (gum, patches, inhaler, lozenge, spray) brought without a prescription (e.g. from the supermarket or chemist)|2=Stop-smoking medication prescribed by a doctor called Zyban, Prexaton or Bupropion|8=Group counselling|6=Self-help book or brochure|10=Telephone support (like Quitline)|…	1	0	0	0	0	0	0	0	0
Smoke-Free Recovery	HBSV5 (EQ5D)	79996	1287	56e0c18e-936c-4ee2-abec-37a286948896		10/03/2016	11:40:54	Yes	1	2	17-Nov-56		4	1	1		4	2305	1	5	1		5	1	0	0	0	0	0
Smoke-Free Recovery	HBSV5 (EQ5D)	79997	1288	56e0c7bf-fb50-41fa-9142-377c86948896		10/03/2016	12:02:56	Yes	1	2	29-Dec-57		4	1	1		4	2428	2	5	2		3	0	0	0	0	1	0
Smoke-Free Recovery	HBSV5 (EQ5D)	79999	1289	56e0c8e5-f074-4efe-8127-377c86948896		10/03/2016	12:16:26	No	1	2	1-Dec-35		4	1	1		4	2304	5	3	2		2	0	0	0	0	1	0
Smoke-Free Recovery	HBSV5 (EQ5D)	80001	1290	56e0d8e8-9f98-4404-ad35-359b86948896		10/03/2016	13:19:09	No	1	1	16-May-81		1	1	1		4	2380	4	3	2		1	0	0	0	0	1	0	1		10	13	2	50	1	5	1-Mar-16	10	6=Self-help book or brochure|11=Going to see a GP|2=Stop-smoking medication prescribed by a doctor called Zyban, Prexaton or Bupropion|4=Nicotine Replacement Therapy (NRT) (gum, patches, inhaler, lozenge, spray) recommended by a doctor|9=Internet support|3=A stop-smoking medication prescribed by a doctor called Varenicline or Champix|1=Own will-power, no help|7=Alternative therapies such as herba…	1	0	0	0	1	0	0	0	0
Smoke-Free Recovery	HBSV5 (EQ5D)	80003	2129	56e0eeed-03a4-45b1-ae6c-72b086948896		10/03/2016	14:51:51	Yes	2	2	25-Oct-67		4	2	2	Vietnam	4	2170	1	5	3		3	0	1	0	0	0	0
Smoke-Free Recovery	HBSV5 (EQ5D)	80018	2130	56e2366f-5ab4-4b67-b023-5cd186948896		11/03/2016	16:17:57	Yes	2	1	15-Apr-48		4	1	2	Macedonia	4	2165	1	4	1		3	0	0	0	0	0	1
Smoke-Free Recovery	HBSV5 (EQ5D)	80020	2131	56e25873-b2f8-43c8-9625-5e0786948896		12/03/2016	11:05:04	No	2	1	9-May-71		4	2	2	Uruguay	4	2200	4	5	1		6	0	0	0	0	0	1
Smoke-Free Recovery	HBSV5 (EQ5D)	80024	2132	56e63315-44c0-43ec-aa3c-279c86948896		14/03/2016	14:44:22	No	2	2	10-Dec-46		1	1	1		4	2177	3	3	2		6	0	0	0	0	1	0	1		10	19	2	50	1	0	13-Mar-13	90	10=Telephone support (like Quitline)|11=Going to see a GP|9=Internet support|6=Self-help book or brochure|3=A stop-smoking medication prescribed by a doctor called Varenicline or Champix|7=Alternative therapies such as herbal or natural remedies, hypnosis, relaxation or accupuncture|2=Stop-smoking medication prescribed by a doctor called Zyban, Prexaton or Bupropion|5=Nicotine Replacement Therapy…	0	0	0	0	0	0	0	0	0
Smoke-Free Recovery	Removal of randomiser	80059	1291	56e74099-f374-4f27-a04c-520b86948896		15/03/2016	09:55:59	Yes	1	1	7-Apr-67		4	1	1		4	2147	1	5	1		6	0	1	0	0	0	0
Smoke-Free Recovery	Removal of randomiser	80061	1292	56e7436e-4db4-46ed-9a95-6bcd86948896		15/03/2016	10:07:01	No	1	2	18-Feb-61		3	1	1		4	2295	2	5	1		5	0	0	0	0	0	1	1		0	15	2	15	1	3	1-Jan-16	14	5=Nicotine Replacement Therapy (NRT) (gum, patches, inhaler, lozenge, spray) brought without a prescription (e.g. from the supermarket or chemist)|2=Stop-smoking medication prescribed by a doctor called Zyban, Prexaton or Bupropion|9=Internet support|10=Telephone support (like Quitline)|4=Nicotine Replacement Therapy (NRT) (gum, patches, inhaler, lozenge, spray) recommended by a doctor|3=A stop-s…	0	1	1	0	0	0	0	0	0
Smoke-Free Recovery	Removal of randomiser	80063	1293	56e74585-f5c4-46e5-9435-6b7986948896		15/03/2016	10:16:07	No	1	1	18-Sep-46		4	1	1		4	2340	1	3	2		1	0	0	0	1	0	0
Smoke-Free Recovery	Removal of randomiser	80071	2133	56e8ce7b-9180-4bd4-9aaa-568086948896		16/03/2016	14:11:36	Yes	2	1	21-Apr-38		4	1	2	Italy	4	2165	1	5	2		2	0	0	0	0	0	1
Smoke-Free Recovery	Removal of randomiser	80073	2134	56e8d61c-ba90-4ea9-9d96-5c8986948896		16/03/2016	14:44:16	Yes	2	1	15-Jul-35		4	1	2	Iraq	4	2165	1	3	2		6	0	0	0	0	0	1
Smoke-Free Recovery	Removal of randomiser	80076	1294	56e9dd50-664c-4bb7-97d1-34db86948896		17/03/2016	09:30:12	No	1	1	24-Jun-72		1	1	1		4	2440	3	3	1		3	0	0	0	0	0	1	2		20	15	2	89	1	1	29-Jan-16	54	3=A stop-smoking medication prescribed by a doctor called Varenicline or Champix|11=Going to see a GP|6=Self-help book or brochure|2=Stop-smoking medication prescribed by a doctor called Zyban, Prexaton or Bupropion|5=Nicotine Replacement Therapy (NRT) (gum, patches, inhaler, lozenge, spray) brought without a prescription (e.g. from the supermarket or chemist)|4=Nicotine Replacement Therapy (NRT)…	0	0	0	0	0	0	0	0	0
Smoke-Free Recovery	Removal of randomiser	80078	1295	56e9e297-c0b8-453a-a150-19ec86948896		17/03/2016	09:52:52	Yes	1	1	5-Feb-94		4	2	1		4	2415	4	3	1		2	0	0	1	0	0	0
Smoke-Free Recovery	Removal of randomiser	80090	1297	56ea01b1-1b38-4c58-a92c-363c86948896		17/03/2016	12:03:48	Yes	1	2	20-May-72		4	1	1		4	2256	2	5	1		2	0	0	0	0	0	1
Smoke-Free Recovery	Removal of randomiser	80091	1296	56e9f450-d2e0-4c13-8bb7-34fa86948896		17/03/2016	12:21:21	Yes	1	2	3-Nov-84		4	1	1		4	2305	1	5	3		4	0	0	1	0	0	0
Smoke-Free Recovery	Removal of randomiser	80093	1298	56ea087e-e564-435e-933e-36cc86948896		17/03/2016	12:32:49	No	1	1	10-Jun-73		1	1	1		4	2446	1	3	1		4	0	0	1	0	0	0	1		8	15	0	50	1	2	11-Feb-16	3	10=Telephone support (like Quitline)|6=Self-help book or brochure|2=Stop-smoking medication prescribed by a doctor called Zyban, Prexaton or Bupropion|4=Nicotine Replacement Therapy (NRT) (gum, patches, inhaler, lozenge, spray) recommended by a doctor|1=Own will-power, no help|7=Alternative therapies such as herbal or natural remedies, hypnosis, relaxation or accupuncture|8=Group counselling|11=G…	1	0	0	1	0	0	0	0	0
Smoke-Free Recovery	Removal of randomiser	80095	2135	56e9f37f-81ac-47e7-b443-34fa86948896		18/03/2016	14:30:50	Yes	2	1	8-Nov-74		1	1	1		4	2565	4	4	1		6	0	0	1	0	0	0	1		5	38	0	40	2
Smoke-Free Recovery	Removal of randomiser	80097	1299	56eb7703-c024-4efc-b3e5-02c386948896		18/03/2016	14:41:35	No	1	1	2-Aug-83		1	1	2	new zealamd	4	2306	4	3	2		1	0	0	0	0	1	0	1		20	14	3	100	1	2	3-Jun-13	2	11=Going to see a GP|5=Nicotine Replacement Therapy (NRT) (gum, patches, inhaler, lozenge, spray) brought without a prescription (e.g. from the supermarket or chemist)|7=Alternative therapies such as herbal or natural remedies, hypnosis, relaxation or accupuncture|3=A stop-smoking medication prescribed by a doctor called Varenicline or Champix|4=Nicotine Replacement Therapy (NRT) (gum, patches, i…	1	0	0	1	1	0	0	0	1
Smoke-Free Recovery	Removal of randomiser	80502	1300	56ef3583-00cc-4555-98d3-353386948896		21/03/2016	10:46:09	Yes	1	1	23-Jun-97		4	2	1		4	2325	4	3	1		6	0	0	0	0	0	1
Smoke-Free Recovery	Removal of randomiser	80509	1301	56ef38c2-4bcc-4592-858d-353386948896		21/03/2016	11:03:10	Yes	1	1	13-May-50		4	2	1		4	2319	1	3	4		3	1	0	0	0	0	0
Smoke-Free Recovery	Removal of randomiser	80526	1302	56ef3f27-45f0-4944-8be2-352986948896		21/03/2016	11:34:08	No	1	2	5-Dec-79		4	1	1		4	2326	2	3	2		1	0	0	0	0	1	0
Smoke-Free Recovery	Removal of randomiser	80646	1303	56f0a973-5e80-4820-a0f5-2c5086948896		22/03/2016	13:12:37	No	1	1	1-Apr-87		1	1	1		4	2262	4	5	2		1	0	0	0	0	1	0	2		10	13	2	50	1	1	22-Mar-16	6	9=Internet support|4=Nicotine Replacement Therapy (NRT) (gum, patches, inhaler, lozenge, spray) recommended by a doctor|7=Alternative therapies such as herbal or natural remedies, hypnosis, relaxation or accupuncture|3=A stop-smoking medication prescribed by a doctor called Varenicline or Champix|8=Group counselling|10=Telephone support (like Quitline)|5=Nicotine Replacement Therapy (NRT) (gum, p…	1	0	0	0	0	0	0	0	0
Smoke-Free Recovery	Removal of randomiser	80651	1304	56f0b130-6f1c-4642-9d21-7f9086948896		22/03/2016	13:48:38	Yes	1	2	12-Aug-42		4	1	2	England	4	2291	1	6	2		2	1	0	0	0	0	0
Smoke-Free Recovery	Removal of randomiser	80704	1305	56f31ce8-3010-44ae-bb02-67d986948896		24/03/2016	09:51:14	Yes	1	1	1-Jun-52		4	2	2	scotland	4	2283	1	5	4		2	1	0	0	0	0	0
Smoke-Free Recovery	Removal of randomiser	80707	1306	56f3233c-1ed8-42f5-b25b-0b6d86948896		24/03/2016	10:41:29	Yes	1	1	3-Mar-92		4	2	1		4	2305	4	5	1		3	0	0	0	0	0	1
Smoke-Free Recovery	Removal of randomiser	80709	1307	56f32ec8-04fc-4907-8cfd-6fa386948896		24/03/2016	11:06:25	Yes	1	2	13-Jun-70		4	1	1		4	2284	3	5	1		2	0	0	0	0	1	0
Smoke-Free Recovery	Removal of randomiser	80712	1308	56f33182-8580-40c9-b53a-5d5786948896		24/03/2016	11:18:01	No	1	1	12-Aug-47		1	1	2	holland	4	2100	2	3	2		2	0	0	0	0	1	0	1		10	15	2	90	1	3	1-Jun-14	30	5=Nicotine Replacement Therapy (NRT) (gum, patches, inhaler, lozenge, spray) brought without a prescription (e.g. from the supermarket or chemist)|2=Stop-smoking medication prescribed by a doctor called Zyban, Prexaton or Bupropion|8=Group counselling|3=A stop-smoking medication prescribed by a doctor called Varenicline or Champix|7=Alternative therapies such as herbal or natural remedies, hypnos…	1	0	1	1	1	0	1	1	0
Smoke-Free Recovery	Removal of randomiser	80714	1309	56f3385f-9b84-4307-8ad5-0c7786948896		24/03/2016	11:48:11	Yes	1	2	4-Apr-53		4	2	1		4	2259	1	3	1		3	0	1	0	0	0	0
Smoke-Free Recovery	Removal of randomiser	80716	1310	56f34d4a-8550-4d43-afd3-67d986948896		24/03/2016	13:16:07	Yes	1	2	1-Mar-86		4	2	1		4	2049	1	6	2		3	0	0	0	0	1	0
Smoke-Free Recovery	Removal of randomiser	80747	1311	56f9b33d-4600-4be7-a56d-6fa486948896		29/03/2016	09:47:02	No	1	1	22-Dec-65		4	1	1		4	2299	5	5	5	work for self	2	0	0	0	0	1	0
Smoke-Free Recovery	Removal of randomiser	80750	1312	56f9bd87-e5a8-4359-a51d-0ae986948896		29/03/2016	10:31:38	Yes	1	1	10-Apr-92		4	1	1		4	2316	1	3	1		2	0	0	0	0	0	1
Smoke-Free Recovery	Removal of randomiser	80754	1313	56f9c2e8-9034-4bfb-9943-73e486948896		29/03/2016	10:51:34	No	1	1	12-Dec-56		1	1	1		4	2295	4	4	1		1	0	0	0	0	0	1	1		25	20	2	100	1	1	29-Mar-16	3	2=Stop-smoking medication prescribed by a doctor called Zyban, Prexaton or Bupropion|6=Self-help book or brochure|5=Nicotine Replacement Therapy (NRT) (gum, patches, inhaler, lozenge, spray) brought without a prescription (e.g. from the supermarket or chemist)|7=Alternative therapies such as herbal or natural remedies, hypnosis, relaxation or accupuncture|3=A stop-smoking medication prescribed by…	1	0	0	0	0	0	0	0	0
Smoke-Free Recovery	Removal of randomiser	80756	1314	56f9c7b0-8588-46be-a665-73e486948896		29/03/2016	11:12:58	Yes	1	1	11-Jun-62		1	1	1		4	2303	3	5	2		1	0	0	0	0	1	0	2		5	35	0	22	1	3	1-Jan-16	64	2=Stop-smoking medication prescribed by a doctor called Zyban, Prexaton or Bupropion|5=Nicotine Replacement Therapy (NRT) (gum, patches, inhaler, lozenge, spray) brought without a prescription (e.g. from the supermarket or chemist)|1=Own will-power, no help|6=Self-help book or brochure|4=Nicotine Replacement Therapy (NRT) (gum, patches, inhaler, lozenge, spray) recommended by a doctor|11=Going to…	0	0	0	0	0	0	0	0	0
Smoke-Free Recovery	Removal of randomiser	80761	1315	56f9d74e-2ae0-4396-a2d3-0ae986948896		29/03/2016	12:19:16	No	1	2	1-Oct-55		4	2	1		4	2285	2	5	2		2	0	1	0	0	0	0
Smoke-Free Recovery	Removal of randomiser	80767	2136	56f9e031-4a28-45c0-91ca-161786948896		29/03/2016	12:59:14	No	2	1	20-Dec-94		1	1	1		4	2195	4	4	2		6	0	0	0	0	1	0	1		35	16	3	140	1	0	8-Mar-16	0	5=Nicotine Replacement Therapy (NRT) (gum, patches, inhaler, lozenge, spray) brought without a prescription (e.g. from the supermarket or chemist)|6=Self-help book or brochure|2=Stop-smoking medication prescribed by a doctor called Zyban, Prexaton or Bupropion|8=Group counselling|9=Internet support|4=Nicotine Replacement Therapy (NRT) (gum, patches, inhaler, lozenge, spray) recommended by a docto…	1	0	0	0	0	0	0	0	0
Smoke-Free Recovery	Removal of randomiser	80771	2137	56f9e20c-44b4-492f-a5a1-161b86948896		29/03/2016	13:06:28	No	2	2	14-Dec-46		1	1	2	Germany	4	2444	5	3	2		6	0	0	0	0	1	0	1		25	17	2	90	1	3	12-Mar-14	1	8=Group counselling|11=Going to see a GP|9=Internet support|2=Stop-smoking medication prescribed by a doctor called Zyban, Prexaton or Bupropion|4=Nicotine Replacement Therapy (NRT) (gum, patches, inhaler, lozenge, spray) recommended by a doctor|7=Alternative therapies such as herbal or natural remedies, hypnosis, relaxation or accupuncture|10=Telephone support (like Quitline)|1=Own will-power, n…	1	0	0	0	0	0	0	0	0
Smoke-Free Recovery	Removal of randomiser	80809	1316	56fb0051-1844-43b4-9676-74d586948896		30/03/2016	09:27:46	Yes	1	2	6-Jan-97		4	2	1		4	2036	4	4	2		5	0	0	0	0	0	1
Smoke-Free Recovery	Removal of randomiser	80813	1317	56fb0356-7e34-408a-ad8a-093286948896		30/03/2016	09:39:12	Yes	1	2	10-Jan-63		4	1	1		4	2284	1	4	4		1	1	0	0	0	0	0
Smoke-Free Recovery	Removal of randomiser	80823	1318	56fb0b62-6220-40ad-bb38-6b2d86948896		30/03/2016	10:15:10	Yes	1	2	25-Mar-44		4	1	1		4	2281	1	3	2		2	1	0	0	0	0	0
Smoke-Free Recovery	Removal of randomiser	80827	2138	56fb3c12-3b60-4d3d-a560-19fd86948896		30/03/2016	13:40:01	Yes	2	1	28-Jul-55		4	2	1		4	2745	1	5	4		3	1	0	0	0	0	0
Smoke-Free Recovery	Removal of randomiser	80829	2139	56fb40cd-521c-48f6-98f8-114086948896		30/03/2016	14:10:34	Yes	2	2	25-May-49		4	1	1		4	2167	3	5	2		6	0	0	0	0	1	0
Smoke-Free Recovery	Removal of randomiser	80831	2140	56fb4e28-39fc-4ba9-bd7e-093286948896		30/03/2016	14:58:11	Yes	2	1	20-Oct-70		1	1	1		4	2540	4	3	1		2	0	0	0	0	0	1	1		30	14	3	210	1	1	21-Mar-16	5	7=Alternative therapies such as herbal or natural remedies, hypnosis, relaxation or accupuncture|8=Group counselling|10=Telephone support (like Quitline)|1=Own will-power, no help|9=Internet support|3=A stop-smoking medication prescribed by a doctor called Varenicline or Champix|2=Stop-smoking medication prescribed by a doctor called Zyban, Prexaton or Bupropion|5=Nicotine Replacement Therapy (NR…	0	0	0	0	1	0	0	0	0
Smoke-Free Recovery	Removal of randomiser	80833	2141	56fb59bd-3e54-4323-9e4a-6b2d86948896		30/03/2016	15:47:15	Yes	2	1	26-Dec-69		4	1	1		4	2119	1	6	1		5	1	0	0	0	0	0
Smoke-Free Recovery	Removal of randomiser	80838	1319	56fc7608-8858-4240-8d7a-5e3986948896		31/03/2016	12:01:02	Yes	1	2	17-Sep-92		1	1	1		4	2330	4	4	2		6	0	0	0	0	1	0	1		6	15	1	80	2	0
Smoke-Free Recovery	Removal of randomiser	80840	1320	56fc7828-3744-4507-a22d-5c9986948896		31/03/2016	12:09:40	Yes	1	2	22-Jul-96		4	1	1		4	2280	2	4	1		1	0	0	0	0	0	1
Smoke-Free Recovery	Removal of randomiser	80843	1321	56fc7d26-ce38-449f-b266-5c9986948896		31/03/2016	12:30:47	Yes	1	1	19-Apr-58		4	2	1		4	2453	1	5	1		3	0	0	1	0	0	0
Smoke-Free Recovery	Removal of randomiser	80846	2142	56fc846a-a3d0-4613-9a19-30aa86948896		31/03/2016	13:01:08	Yes	2	2	10-Dec-42		4	2	2	Lebanon	4	2166	5	4	2		2	0	0	0	0	0	1
Smoke-Free Recovery	Removal of randomiser	80848	2143	56fc952b-acf0-4c0c-9e40-5e3a86948896		31/03/2016	14:17:04	Yes	2	1	4-Nov-40		4	1	1		4	2233	1	4	2		3	0	0	0	1	0	0
Smoke-Free Recovery	Removal of randomiser	80850	2144	56fc9b8c-ca18-4d1a-b912-343286948896		31/03/2016	14:41:04	Yes	2	2	11-Oct-45		4	2	2	United Kingdom	4	2176	1	4	3		6	0	0	1	0	0	0
Smoke-Free Recovery	Removal of randomiser	80866	2145	56ff2825-df98-45a8-9058-31f386948896		2/04/2016	13:03:53	No	2	1	23-Apr-48		4	2	2	Wales	4	2576	1	4	4		6	1	0	0	0	0	0
Smoke-Free Recovery	Removal of randomiser	80880	1322	5702f7f2-a3c0-4bfe-8554-64bd86948896		5/04/2016	09:29:09	Yes	1	1	20-Oct-86		4	2	1		4	2287	2	5	1		3	1	0	0	0	0	0
Smoke-Free Recovery	Removal of randomiser	80885	1323	5702fc75-0428-410f-9cf6-64bf86948896		5/04/2016	09:47:18	No	1	1	30-Jan-69		1	1	1		4	2335	4	5	4		5	0	1	0	0	0	0	2		6	41	1	12	1	6	4-Jan-16	10	9=Internet support|7=Alternative therapies such as herbal or natural remedies, hypnosis, relaxation or accupuncture|10=Telephone support (like Quitline)|4=Nicotine Replacement Therapy (NRT) (gum, patches, inhaler, lozenge, spray) recommended by a doctor|1=Own will-power, no help|6=Self-help book or brochure|2=Stop-smoking medication prescribed by a doctor called Zyban, Prexaton or Bupropion|5=Nic…	1	0	0	0	0	0	0	0	0
Smoke-Free Recovery	Removal of randomiser	80904	2146	5705e605-07c0-40d3-87f5-0e9f86948896		7/04/2016	14:47:22	No	2	1	18-Nov-72		1	1	1		1	2170	4	3	2		1	0	0	0	0	1	0	1		15	12	3	80	1	0	1-Jan-14	6	3=A stop-smoking medication prescribed by a doctor called Varenicline or Champix|8=Group counselling|4=Nicotine Replacement Therapy (NRT) (gum, patches, inhaler, lozenge, spray) recommended by a doctor|9=Internet support|7=Alternative therapies such as herbal or natural remedies, hypnosis, relaxation or accupuncture|11=Going to see a GP|6=Self-help book or brochure|5=Nicotine Replacement Therapy …	1	0	0	0	0	0	0	0	0
Smoke-Free Recovery	Removal of randomiser	80912	1324	570add91-5d10-4023-a205-42d886948896		11/04/2016	09:18:57	Yes	1	2	8-Jul-60		4	2	1		4	2319	1	4	2		2	0	0	0	0	1	0
Smoke-Free Recovery	Removal of randomiser	80914	1325	570ae538-560c-4c24-8125-367a86948896		11/04/2016	09:48:25	Yes	1	1	7-Dec-93		4	2	1		4	2320	4	5	1		2	0	0	0	0	0	1
Smoke-Free Recovery	Removal of randomiser	80916	1326	570ae9b6-17f4-41f7-a460-42d886948896		11/04/2016	10:06:35	No	1	2	20-Dec-58		1	1	1		4	2284	2	5	1		5	0	0	0	0	0	1	1		20	18	2	100	1	1	9-Apr-16	3	9=Internet support|3=A stop-smoking medication prescribed by a doctor called Varenicline or Champix|11=Going to see a GP|5=Nicotine Replacement Therapy (NRT) (gum, patches, inhaler, lozenge, spray) brought without a prescription (e.g. from the supermarket or chemist)|1=Own will-power, no help|6=Self-help book or brochure|8=Group counselling|2=Stop-smoking medication prescribed by a doctor called …	1	0	0	0	0	0	0	0	0
Smoke-Free Recovery	Removal of randomiser	80918	1327	570af4af-1b3c-4a16-b0de-143586948896		11/04/2016	10:53:29	No	1	2	6-May-50		4	1	1		4	2299	2	3	2		1	0	1	0	0	0	0
Smoke-Free Recovery	Removal of randomiser	80920	1328	570b01eb-d10c-4b78-a214-143586948896		11/04/2016	11:48:54	No	1	2	26-Nov-43		4	2	1		4	2663	3	5	2		2	0	0	0	0	1	0
Smoke-Free Recovery	Removal of randomiser	80922	1329	570b0763-f428-42e7-9426-366386948896		11/04/2016	12:12:22	Yes	1	2	19-Jun-47		4	2	1		4	2285	3	5	2		2	1	0	0	0	0	0
Smoke-Free Recovery	Removal of randomiser	80924	1330	570b0e65-f018-4f56-987c-366386948896		11/04/2016	12:44:09	Yes	1	2	13-May-38		4	2	1		4	2013	3	3	2		2	0	0	0	0	1	0
Smoke-Free Recovery	Removal of randomiser	80930	2148	570c785c-0858-4f4c-8427-205586948896		12/04/2016	14:26:24	Yes	2	2	7-Jan-60		4	2	2	Laos	4	2560	1	3	1		2	0	0	0	0	0	1
Smoke-Free Recovery	Removal of randomiser	80932	2149	570c7d6f-ea14-414e-9b20-164786948896		12/04/2016	14:50:14	Yes	2	1	22-Dec-62		4	2	1		4	2176	1	3	1		2	1	0	0	0	0	0
Smoke-Free Recovery	Removal of randomiser	80935	1331	570c8656-43e8-4f8a-af31-156786948896		12/04/2016	15:27:08	Yes	1	1	17-Nov-95		4	2	1		4	2086	4	5	1		2	0	0	0	0	0	1
Smoke-Free Recovery	Removal of randomiser	80937	1332	570c8c22-fe04-46fa-ad0b-156786948896		12/04/2016	15:53:21	No	1	1	8-Aug-58		3	1	1		4	2287	4	3	2		1	0	0	0	0	0	1	1		6	16	1	60	1	3	1-Apr-16	3	8=Group counselling|2=Stop-smoking medication prescribed by a doctor called Zyban, Prexaton or Bupropion|11=Going to see a GP|6=Self-help book or brochure|10=Telephone support (like Quitline)|5=Nicotine Replacement Therapy (NRT) (gum, patches, inhaler, lozenge, spray) brought without a prescription (e.g. from the supermarket or chemist)|4=Nicotine Replacement Therapy (NRT) (gum, patches, inhaler,…	1	0	0	0	0	0	0	0	0
Smoke-Free Recovery	Removal of randomiser	80955	2150	570dbf09-8880-4462-a722-5dbb86948896		13/04/2016	13:58:21	Yes	2	2	1-Dec-65		4	2	1		4	2132	5	3	1		3	1	0	0	0	0	0
Smoke-Free Recovery	Removal of randomiser	80959	1333	570ed504-08d0-411c-afb2-0e2186948896		14/04/2016	09:26:56	Yes	1	2	25-Nov-78		4	2	1		4	2287	1	6	1		5	0	1	0	0	0	0
Smoke-Free Recovery	Removal of randomiser	80961	1334	570edd71-14e8-4166-b30d-02d186948896		14/04/2016	10:03:09	Yes	1	1	18-Jun-82		4	3	1		4	2321	1	5	1		5	1	0	0	0	0	0
Smoke-Free Recovery	Removal of randomiser	80963	1335	570ee3b1-9634-4714-8ca1-4c4f86948896		14/04/2016	10:28:44	Yes	1	2	15-Mar-52		4	1	1		4	2323	5	6	5	Defined Benefit Pension	2	0	1	0	0	0	0
Smoke-Free Recovery	Removal of randomiser	80965	1336	570ee6af-3d54-4a34-9c1d-41f586948896		14/04/2016	10:47:59	No	1	2	15-Jul-95		1	1	1		1	2333	4	3	2		6	0	0	0	0	0	1	1		20	15	2	150	1	2	14-Apr-16	14	5=Nicotine Replacement Therapy (NRT) (gum, patches, inhaler, lozenge, spray) brought without a prescription (e.g. from the supermarket or chemist)|4=Nicotine Replacement Therapy (NRT) (gum, patches, inhaler, lozenge, spray) recommended by a doctor|10=Telephone support (like Quitline)|1=Own will-power, no help|8=Group counselling|9=Internet support|11=Going to see a GP|6=Self-help book or brochure…	0	0	0	0	0	0	0	0	0
Smoke-Free Recovery	Removal of randomiser	80966	2151	570dc690-a9c0-4a31-8d00-5dbb86948896		14/04/2016	14:48:59	Yes	2	2	14-Aug-35		4	3	2	The Netherlands	4	2178	1	4	3		6	1	0	0	0	0	0
Smoke-Free Recovery	Removal of randomiser	80969	1337	57102774-fbe0-4b10-a974-745d86948896		15/04/2016	09:31:06	No	1	2	25-Jun-82		4	2	1		4	2285	2	5	2		6	1	0	0	0	0	0
Smoke-Free Recovery	Removal of randomiser	80971	1338	57102a5d-9f40-4bf9-9400-0c5d86948896		15/04/2016	09:43:38	No	1	2	17-Aug-76		4	3	1		4	2286	4	5	2		2	0	0	0	0	1	0
Smoke-Free Recovery	Removal of randomiser	80973	2152	57118d28-e538-42a3-a881-085386948896		16/04/2016	10:55:23	No	2	1	30-Jun-97		4	2	1		4	2560	2	4	1		6	0	0	0	0	0	1
Smoke-Free Recovery	Removal of randomiser	80975	2153	57119314-7b20-464c-adb8-085e86948896		16/04/2016	11:20:54	No	2	2	3-Oct-37		4	2	1		4	0	1	4	1		6	1	0	0	0	0	0
Smoke-Free Recovery	Removal of randomiser	80977	2154	57119d42-94b8-4150-b42e-112086948896		16/04/2016	12:05:19	No	2	1	10-Aug-72		4	1	1		4	2575	3	4	1		6	0	0	0	0	0	1
Smoke-Free Recovery	Removal of randomiser	80984	2155	57145718-4140-4ccb-a3c8-1c2986948896		18/04/2016	13:42:05	No	2	1	30-Jun-97		4	2	1		4	2560	2	4	1		1	0	0	0	0	0	1
Smoke-Free Recovery	Removal of randomiser	81040	2156	5716f271-4ce4-4c20-a3ec-74e586948896		20/04/2016	13:13:56	Yes	2	1	6-Jan-73		4	2	2	Poland	4	2170	4	5	1		6	0	0	0	0	0	1
Smoke-Free Recovery	Removal of randomiser	81044	2159	57170240-f7b0-4d5c-94c6-496686948896		20/04/2016	14:19:11	Yes	2	1	27-Mar-16		4	1	2	Ireland	4	2031	2	5	1		5	1	0	0	0	0	0
Smoke-Free Recovery	Removal of randomiser	81047	2160	57185bdb-71c4-4d2a-a360-54ab86948896		21/04/2016	14:50:59	Yes	2	2	16-Aug-39		4	2	1		4	2170	1	3	3		4	1	0	0	0	0	0
Smoke-Free Recovery	Removal of randomiser	81048	2157	5716fdd3-0c9c-49f7-9585-5e5686948896		21/04/2016	15:12:27	No	2	1	24-Oct-69		1	1	1		4	2112	4	3	1		3	0	0	0	0	0	1	7		15	8	3	60	1	2	25-Oct-15	31	6=Self-help book or brochure|8=Group counselling|10=Telephone support (like Quitline)|3=A stop-smoking medication prescribed by a doctor called Varenicline or Champix|4=Nicotine Replacement Therapy (NRT) (gum, patches, inhaler, lozenge, spray) recommended by a doctor|1=Own will-power, no help|11=Going to see a GP|2=Stop-smoking medication prescribed by a doctor called Zyban, Prexaton or Bupropion…	1	0	0	1	0	0	0	0	0
Smoke-Free Recovery	Removal of randomiser	81071	2161	57198f82-cd00-4821-89cf-7aa586948896		22/04/2016	12:44:03	Yes	2	2	2-Jun-37		4	2	1		4	2161	1	4	2		2	0	0	0	0	1	0
Smoke-Free Recovery	Removal of randomiser	81073	2162	5719932a-7dc8-4742-9469-7e1a86948896		22/04/2016	12:59:05	Yes	2	1	8-Apr-93		4	2	1		4	0	4	6	1		4	0	0	0	0	0	1
Smoke-Free Recovery	Removal of randomiser	81075	2163	5719972e-c7ec-460f-997f-7aa886948896		22/04/2016	13:17:03	Yes	2	2	1-Apr-48		4	2	2	Thailand	4	2171	1	1	2		6	0	0	0	0	0	1
Smoke-Free Recovery	Removal of randomiser	81077	2164	571c24ec-2724-4ef9-a200-1f8786948896		24/04/2016	11:45:43	No	2	1	23-Aug-47		4	3	2	Chille	4	2560	3	6	1		6	0	0	1	0	0	0
Smoke-Free Recovery	Removal of randomiser	81079	1339	571e9fe5-5254-40be-9f0f-4af186948896		26/04/2016	08:58:47	No	1	1	3-Nov-86		1	1	1		4	2264	3	5	2		6	0	0	0	0	0	1	1		15	9	2	80	1	1	1-Jan-16	2	3=A stop-smoking medication prescribed by a doctor called Varenicline or Champix|1=Own will-power, no help|10=Telephone support (like Quitline)|4=Nicotine Replacement Therapy (NRT) (gum, patches, inhaler, lozenge, spray) recommended by a doctor|2=Stop-smoking medication prescribed by a doctor called Zyban, Prexaton or Bupropion|9=Internet support|7=Alternative therapies such as herbal or natural …	1	0	0	0	1	0	0	0	0
Smoke-Free Recovery	Removal of randomiser	81081	1340	571ea24b-5984-48cd-9f41-489886948896		26/04/2016	09:06:29	Yes	1	1	18-Jun-70		4	1	2	new zealand	4	2319	2	3	1		4	0	0	0	0	0	1
Smoke-Free Recovery	Removal of randomiser	81083	1341	571ea78c-1da4-4392-abfc-489a86948896		26/04/2016	09:30:38	No	1	1	29-Aug-16		1	1	1		4	2282	4	3	1		4	1	0	0	0	0	0	1		30	18	2	220	1	0	1-Apr-13	7	9=Internet support|4=Nicotine Replacement Therapy (NRT) (gum, patches, inhaler, lozenge, spray) recommended by a doctor|11=Going to see a GP|1=Own will-power, no help|8=Group counselling|7=Alternative therapies such as herbal or natural remedies, hypnosis, relaxation or accupuncture|6=Self-help book or brochure|2=Stop-smoking medication prescribed by a doctor called Zyban, Prexaton or Bupropion|1…	1	0	0	0	0	0	0	0	0
Smoke-Free Recovery	Removal of randomiser	81089	1342	571eb4fa-e480-4982-8e7e-361b86948896		26/04/2016	10:26:24	No	1	1	24-Aug-82		1	1	1		4	2290	4	3	2		1	0	0	0	0	0	1	1		5	16	1	50	2
Smoke-Free Recovery	Removal of randomiser	81091	1343	571eb719-5728-428f-baf3-489986948896		26/04/2016	10:35:46	Yes	1	1	24-Aug-59		4	2	1		4	0	3	6	2		2	0	0	0	0	1	0
Smoke-Free Recovery	Removal of randomiser	81106	1344	571ec5d7-0698-455e-9e99-4af186948896		26/04/2016	11:39:11	No	1	1	19-Jun-89		1	1	1		1	2287	4	3	1		2	0	0	0	0	0	1	2		25	15	2	30	1	0	9-Mar-11	300	7=Alternative therapies such as herbal or natural remedies, hypnosis, relaxation or accupuncture|1=Own will-power, no help|10=Telephone support (like Quitline)|11=Going to see a GP|2=Stop-smoking medication prescribed by a doctor called Zyban, Prexaton or Bupropion|9=Internet support|4=Nicotine Replacement Therapy (NRT) (gum, patches, inhaler, lozenge, spray) recommended by a doctor|3=A stop-smok…	0	0	0	0	1	0	0	0	0
Smoke-Free Recovery	Removal of randomiser	81142	2165	572033c2-7b8c-4d91-b0e9-602086948896		27/04/2016	13:38:26	Yes	2	1	14-Apr-71		4	1	1		4	2570	1	6	1		5	1	0	0	0	0	0
Smoke-Free Recovery	Removal of randomiser	81144	2166	57204053-1874-4bfa-8e41-4bd986948896		27/04/2016	14:31:42	Yes	2	1	12-Sep-82		4	1	1		4	2211	1	5	1		5	1	0	0	0	0	0
Smoke-Free Recovery	Removal of randomiser	81146	2167	5720444c-db44-4af6-bb44-602386948896		27/04/2016	14:49:32	Yes	2	2	21-Oct-59		4	2	2	Serbia	4	2171	1	6	2		6	0	0	0	0	1	0
Smoke-Free Recovery	Removal of randomiser	81148	1345	57204ef8-8400-48af-9769-4bd986948896		27/04/2016	15:35:13	No	1	1	29-Dec-70		4	2	1		4	2420	1	3	1		4	1	0	0	0	0	0
Smoke-Free Recovery	Removal of randomiser	81150	1346	57205561-4474-435b-8c8b-279286948896		27/04/2016	16:09:29	No	1	1	2-Oct-52		1	1	1		4	2289	3	5	1		2	0	0	0	0	1	0	1		15	14	2	100	1	48	25-Apr-16	48	10=Telephone support (like Quitline)|3=A stop-smoking medication prescribed by a doctor called Varenicline or Champix|11=Going to see a GP|9=Internet support|8=Group counselling|4=Nicotine Replacement Therapy (NRT) (gum, patches, inhaler, lozenge, spray) recommended by a doctor|2=Stop-smoking medication prescribed by a doctor called Zyban, Prexaton or Bupropion|7=Alternative therapies such as her…	1	0	0	1	1	0	0	0	0
Smoke-Free Recovery	Removal of randomiser	81166	1347	57214e34-be40-46ae-9fee-578e86948896		28/04/2016	09:44:03	Yes	1	1	28-Dec-78		4	1	1		4	2285	4	4	1		2	0	0	0	0	0	1
Smoke-Free Recovery	Removal of randomiser	81170	1348	572152fc-0444-41fe-a322-208a86948896		28/04/2016	10:05:03	Yes	1	1	21-Jun-97		4	2	1		4	2330	4	4	1		2	1	0	0	0	0	0
Smoke-Free Recovery	Removal of randomiser	81201	1349	57216ef8-631c-4a05-ab0f-208c86948896		28/04/2016	12:04:28	Yes	1	1	14-Jan-95		3	2	1		4	2291	2	5	1		5	1	0	0	0	0	0
Smoke-Free Recovery	Removal of randomiser	81206	1350	572171ad-5eb4-4b2e-a980-578e86948896		28/04/2016	12:15:13	No	1	1	9-Oct-81		1	1	1		4	2263	4	5	2		2	0	0	0	0	1	0	1		10	9	0	63	1	0	1-Apr-08	730	4=Nicotine Replacement Therapy (NRT) (gum, patches, inhaler, lozenge, spray) recommended by a doctor|9=Internet support|1=Own will-power, no help|10=Telephone support (like Quitline)|6=Self-help book or brochure|3=A stop-smoking medication prescribed by a doctor called Varenicline or Champix|2=Stop-smoking medication prescribed by a doctor called Zyban, Prexaton or Bupropion|5=Nicotine Replacemen…	0	0	0	0	0	0	0	0	0
Smoke-Free Recovery	Removal of randomiser	81218	2168	57218e21-2908-4600-a180-208c86948896		28/04/2016	14:18:26	Yes	2	1	7-Aug-94		3	3	1		4	2575	4	4	1		6	0	0	0	0	0	1
Smoke-Free Recovery	Removal of randomiser	81224	2169	5721951b-3368-4758-94fa-208a86948896		28/04/2016	14:45:51	Yes	2	1	9-Mar-43		4	1	1		4	2576	1	6	4		6	1	0	0	0	0	0
Smoke-Free Recovery	Removal of randomiser	81235	2170	57219aa0-df8c-40b5-a5bc-578e86948896		28/04/2016	15:09:33	Yes	2	2	10-Sep-16		4	1	1		4	2168	5	3	2		1	0	0	0	0	1	0
Smoke-Free Recovery	Removal of randomiser	81240	1351	57229a6e-fab4-40ba-8b27-07f886948896		29/04/2016	09:26:33	No	1	2	20-Mar-50		4	3	2	England	4	2280	4	5	2		2	0	0	0	0	1	0
Smoke-Free Recovery	Removal of randomiser	81244	1352	5722a128-af08-41a4-81b6-4cf286948896		29/04/2016	09:51:02	Yes	1	1	2-Oct-70		4	2	1		4	2259	2	5	1		5	0	1	0	0	0	0
Smoke-Free Recovery	Removal of randomiser	81248	1353	5722a2fc-3b7c-42de-9ef9-2b3e86948896		29/04/2016	09:58:17	No	1	1	8-Nov-64		4	2	1		4	2287	1	5	1		3	0	0	1	0	0	0
Smoke-Free Recovery	Removal of randomiser	81250	1354	5722a6a5-4e7c-4b54-b9d8-578186948896		29/04/2016	10:14:11	No	1	1	25-Aug-95		4	2	1		4	2281	2	5	1		2	1	0	0	0	0	0
Smoke-Free Recovery	Removal of randomiser	81252	2171	5722c260-1ad8-40ce-88b9-578186948896		29/04/2016	12:11:51	Yes	2	2	20-Feb-46		4	2	2	Greece	4	2171	1	2	2		6	0	0	0	0	1	0
Smoke-Free Recovery	Removal of randomiser	81254	2172	5722c5f9-63f4-46b8-9a5b-578186948896		29/04/2016	12:26:58	Yes	2	2	8-Sep-94		1	1	1		4	2566	2	5	1		6	0	0	0	0	0	1	1		10	15	1	50	2
Smoke-Free Recovery	Removal of randomiser	81258	1355	57268fe7-5214-4096-a16e-1f2586948896		2/05/2016	09:25:40	Yes	1	1	7-Apr-86		4	1	1		4	2287	2	5	1		5	0	0	0	0	0	1
Smoke-Free Recovery	Removal of randomiser	81260	1356	57269c32-e3e4-4693-a4b3-7e3586948896		2/05/2016	10:18:55	No	1	2	31-Oct-42		4	1	1		4	2354	5	3	2		1	0	0	0	0	1	0
Smoke-Free Recovery	Removal of randomiser	81262	1357	5726a212-3494-4c58-afa4-7e3486948896		2/05/2016	10:43:42	Yes	1	1	2-Apr-80		4	2	1		4	2300	1	6	1		5	1	0	0	0	0	0
Smoke-Free Recovery	Removal of randomiser	81264	2173	5726b849-aa30-4ca2-b007-7e3286948896		2/05/2016	12:19:34	Yes	2	2	4-Jan-48		4	2	1		4	2564	5	3	2		6	0	0	0	0	1	0
Smoke-Free Recovery	Removal of randomiser	81265	2173	5726bf23-3564-421d-9c05-7e3286948896		2/05/2016	12:44:52	No	2	2	4-Jan-48		4	2	1		4	2564	5	3	2		6	0	0	0	0	1	0
Smoke-Free Recovery	Removal of randomiser	81271	1358	5728325e-ed58-4ddd-8068-0e0f0a02f447		3/05/2016	15:12:39	No	1	1	25-Apr-70		1	1	1		4	2290	1	3	2		1	0	0	0	0	1	0	2		10	40	2	50	1	2	3-May-16	7	2=Stop-smoking medication prescribed by a doctor called Zyban, Prexaton or Bupropion|5=Nicotine Replacement Therapy (NRT) (gum, patches, inhaler, lozenge, spray) brought without a prescription (e.g. from the supermarket or chemist)|10=Telephone support (like Quitline)|3=A stop-smoking medication prescribed by a doctor called Varenicline or Champix|1=Own will-power, no help|8=Group counselling|9=I…	1	0	0	0	1	0	0	0	0
Smoke-Free Recovery	Removal of randomiser	81301	2174	57297882-7184-4358-8d33-07270a02f447		5/05/2016	14:33:23	Yes	2	2	5-Aug-51		4	2	1		4	2168	1	2	2		6	0	0	0	0	1	0
Smoke-Free Recovery	Removal of randomiser	81307	2175	572c09f0-5eb0-4444-b9ac-2dbd0a02f447		6/05/2016	13:09:43	Yes	2	1	1-May-16		1	1	1		4	2164	4	3	2		1	0	0	0	0	1	0	2		10	15	1	25	1	0	1-Jan-16	8	4=Nicotine Replacement Therapy (NRT) (gum, patches, inhaler, lozenge, spray) recommended by a doctor|8=Group counselling|6=Self-help book or brochure|5=Nicotine Replacement Therapy (NRT) (gum, patches, inhaler, lozenge, spray) brought without a prescription (e.g. from the supermarket or chemist)|7=Alternative therapies such as herbal or natural remedies, hypnosis, relaxation or accupuncture|1=Own…	1	0	0	0	1	0	0	0	0
Smoke-Free Recovery	Removal of randomiser	81772	1359	57312f13-fad8-4538-a917-538b0a02f447		10/05/2016	10:47:51	Yes	1	1	9-May-63		4	1	1		4	2262	1	5	1		6	0	1	0	0	0	0
Smoke-Free Recovery	Removal of randomiser	81781	1360	5731363f-a628-4bcc-8401-25e50a02f447		10/05/2016	11:18:53	No	1	2	18-Feb-58		4	2	1		4	2316	1	5	1		4	1	0	0	0	0	0
Smoke-Free Recovery	Removal of randomiser	81786	1361	5731415e-b680-4c70-9269-53910a02f447		10/05/2016	12:08:45	No	1	1	6-Oct-48		4	1	1		1	2296	1	5	2		2	0	0	0	0	1	0
Smoke-Free Recovery	Removal of randomiser	81855	2176	5732926a-ac84-42e8-92d9-6e090a02f447		11/05/2016	12:02:51	Yes	2	2	12-Nov-59		4	1	1		4	2571	2	5	1		5	1	0	0	0	0	0
Smoke-Free Recovery	Removal of randomiser	81881	1362	5733c736-7770-48f3-8e47-538d0a02f447		12/05/2016	10:02:42	Yes	1	1	17-Jan-53		4	1	1		4	2280	1	6	5	investments	5	1	0	0	0	0	0
Smoke-Free Recovery	Removal of randomiser	81883	1363	5733cba0-72cc-4762-99ad-538d0a02f447		12/05/2016	10:20:22	No	1	1	28-Mar-80		1	1	1		1	2400	4	3	2		1	0	0	0	0	1	0	1		10	24	2	55	2
Smoke-Free Recovery	Removal of randomiser	81886	1364	5733d0e4-61c8-4320-8c85-53910a02f447		12/05/2016	10:45:18	No	1	1	1-Jun-50		4	1	1		4	2265	4	2	2		1	0	0	0	0	1	0
Smoke-Free Recovery	Removal of randomiser	81896	2177	573404e7-1f54-4927-ac5c-53900a02f447		12/05/2016	14:30:48	Yes	2	1	7-Sep-50		1	1	1		4	2164	1	3	2		6	0	0	0	0	0	1	1		20	16	3	150	1	0	9-May-06	999	4=Nicotine Replacement Therapy (NRT) (gum, patches, inhaler, lozenge, spray) recommended by a doctor|1=Own will-power, no help|10=Telephone support (like Quitline)|2=Stop-smoking medication prescribed by a doctor called Zyban, Prexaton or Bupropion|3=A stop-smoking medication prescribed by a doctor called Varenicline or Champix|6=Self-help book or brochure|9=Internet support|5=Nicotine Replacemen…	0	0	0	1	0	0	0	0	0
Smoke-Free Recovery	Removal of randomiser	81914	1366	5735106a-d650-4667-ae68-53900a02f447		13/05/2016	09:26:29	No	1	2	9-Aug-63		1	1	1		4	2280	2	5	1		3	0	0	1	0	0	0	1		10	15	2	50	1	1	15-Apr-15	5	1=Own will-power, no help|6=Self-help book or brochure|9=Internet support|10=Telephone support (like Quitline)|4=Nicotine Replacement Therapy (NRT) (gum, patches, inhaler, lozenge, spray) recommended by a doctor|3=A stop-smoking medication prescribed by a doctor called Varenicline or Champix|5=Nicotine Replacement Therapy (NRT) (gum, patches, inhaler, lozenge, spray) brought without a prescriptio…	0	0	0	1	0	0	0	0	0
Smoke-Free Recovery	Removal of randomiser	81916	1367	573512f6-b1f4-4ccf-94f3-21970a02f447		13/05/2016	09:42:14	Yes	1	1	3-Jan-92		4	2	1		4	2299	2	6	5	Scholarship Stipend	2	1	0	0	0	0	0
Smoke-Free Recovery	Removal of randomiser	81921	1368	5735184b-3884-4eaa-93ab-6e090a02f447		13/05/2016	09:59:44	No	1	2	13-Mar-45		4	1	2	germany	4	2292	3	6	2		2	0	0	0	0	1	0
Smoke-Free Recovery	Removal of randomiser	81929	0	573563b2-4074-4534-a9c4-28dc0a02f447		13/05/2016	15:18:43	No	2	1	13-May-16		4	1	1		4
Smoke-Free Recovery	Removal of randomiser	81931	2178	573562e1-f710-4050-acbb-538b0a02f447		13/05/2016	15:23:39	Yes	2	1	27-Sep-58		4	1	1		4	2176	1	5	2		6	0	0	0	0	1	0
Smoke-Free Recovery	Removal of randomiser	81950	1370	573909bc-f348-4145-80fe-045b0a02f447		16/05/2016	09:47:45	No	1	2	24-May-38		4	2	2	England	4	2316	3	5	2		2	0	0	0	0	1	0
Smoke-Free Recovery	Removal of randomiser	81952	1371	57390f30-1268-4363-a13b-04590a02f447		16/05/2016	10:09:31	Yes	1	2	24-Feb-59		4	2	1		4	2315	3	6	2		2	0	1	0	0	0	0
Smoke-Free Recovery	Removal of randomiser	81954	1372	57391301-6a48-4327-9591-045b0a02f447		16/05/2016	10:26:15	Yes	1	1	14-Jan-96		4	2	1		4	6280	4	4	2		1	0	0	0	0	0	1
Smoke-Free Recovery	Removal of randomiser	81956	2179	5739180f-8a88-4eb3-87ab-045d0a02f447		16/05/2016	10:46:56	Yes	2	2	29-Jul-68		4	1	1		4	2517	2	3	1		6	0	0	0	0	0	1
Smoke-Free Recovery	Removal of randomiser	81978	2180	573a7e0a-0d2c-410b-9fd3-045f0a02f447		17/05/2016	13:52:51	Yes	2	2	17-May-16		4	2	2	India	4	2167	1	6	3		6	0	0	0	0	0	1
Smoke-Free Recovery	Removal of randomiser	81980	1373	573a9b95-8320-49ee-92ba-04590a02f447		17/05/2016	14:22:01	Yes	1	2	8-Dec-56		4	2	1		4	2280	1	3	3		2	0	0	0	0	1	0
Smoke-Free Recovery	Removal of randomiser	81986	1374	573ba279-536c-4bd1-bc15-7f7f0a02f447		18/05/2016	09:03:14	No	1	1	10-Jun-56		1	1	1		4	2315	1	3	2		2	0	0	0	0	1	0	1		10	16	2	40	1	48	15-May-16	3	5=Nicotine Replacement Therapy (NRT) (gum, patches, inhaler, lozenge, spray) brought without a prescription (e.g. from the supermarket or chemist)|3=A stop-smoking medication prescribed by a doctor called Varenicline or Champix|9=Internet support|4=Nicotine Replacement Therapy (NRT) (gum, patches, inhaler, lozenge, spray) recommended by a doctor|11=Going to see a GP|6=Self-help book or brochure|1…	0	0	0	1	1	0	0	0	0
Smoke-Free Recovery	Removal of randomiser	81993	2181	573be9d9-3ff4-4342-95ca-045f0a02f447		18/05/2016	14:07:17	Yes	2	1	2-Dec-67		1	1	1		4	2168	1	5	1		3	0	0	1	0	0	0	3		25	24	3	112	1	0	16-May-13	14	2=Stop-smoking medication prescribed by a doctor called Zyban, Prexaton or Bupropion|5=Nicotine Replacement Therapy (NRT) (gum, patches, inhaler, lozenge, spray) brought without a prescription (e.g. from the supermarket or chemist)|8=Group counselling|6=Self-help book or brochure|7=Alternative therapies such as herbal or natural remedies, hypnosis, relaxation or accupuncture|4=Nicotine Replacemen…	0	0	0	0	1	0	0	0	0
Smoke-Free Recovery	Removal of randomiser	81998	1375	573cf957-2698-420e-9cc0-04590a02f447		19/05/2016	09:26:40	No	1	2	29-Mar-71		4	2	1		4	2265	1	6	1		5	0	0	0	0	0	1
Smoke-Free Recovery	Removal of randomiser	82005	1376	573e6998-e66c-4f9f-8d77-04590a02f447		20/05/2016	11:38:07	No	1	1	12-May-87		1	1	1		1	2520	4	3	2		1	0	0	0	0	1	0	1		7	12	1	70	2
Smoke-Free Recovery	Removal of randomiser	82014	1377	573e7461-40a0-4ee0-9cf9-045b0a02f447		20/05/2016	12:24:04	No	1	1	13-Dec-84		1	1	1		4	2324	4	5	1		2	0	0	1	0	0	0	1		20	13	2	110	1	1	1-May-13	9	11=Going to see a GP|4=Nicotine Replacement Therapy (NRT) (gum, patches, inhaler, lozenge, spray) recommended by a doctor|3=A stop-smoking medication prescribed by a doctor called Varenicline or Champix|6=Self-help book or brochure|1=Own will-power, no help|2=Stop-smoking medication prescribed by a doctor called Zyban, Prexaton or Bupropion|5=Nicotine Replacement Therapy (NRT) (gum, patches, inha…	1	0	0	0	0	0	0	0	0
Smoke-Free Recovery	Removal of randomiser	82016	1378	573e78c5-3d08-4228-a4fe-04590a02f447		20/05/2016	12:42:47	Yes	1	1	23-Nov-53		4	2	1		4	2447	4	5	4		6	0	0	0	0	0	1
Smoke-Free Recovery	Removal of randomiser	82024	2182	57410f54-bcd0-4ef5-b19f-6b010a02f447		22/05/2016	11:47:06	No	2	1	30-Nov-37		4	1	2	Italy	4	0	5	2	4		6	1	0	0	0	0	0
Smoke-Free Recovery	Removal of randomiser	82029	1380	57423de6-235c-4877-a848-6b030a02f447		23/05/2016	09:21:23	No	1	1	31-Jan-63		4	1	1		4	2423	2	5	2		1	0	0	0	0	1	0
Smoke-Free Recovery	Removal of randomiser	82032	1381	574244b6-6ddc-4683-8a59-6b070a02f447		23/05/2016	09:54:42	No	1	2	11-Apr-53		4	2	2	new zealand	4	2306	3	6	1		4	1	0	0	0	0	0
Smoke-Free Recovery	Removal of randomiser	82033	1379	57423bed-82f8-44db-991c-6b000a02f447		23/05/2016	10:08:29	Yes	1	1	29-Jul-80		4	2	1		4	2296	4	4	1		2	0	0	0	0	1	0
Smoke-Free Recovery	Removal of randomiser	82042	2183	5742733c-fa40-4929-a1d5-26910a02f447		23/05/2016	13:15:51	Yes	2	2	23-Jan-48		4	1	2	Ireland	4	2163	1	5	2		2	0	0	0	0	1	0
Smoke-Free Recovery	Removal of randomiser	82045	1382	574392b4-1690-4dfd-b681-6b010a02f447		24/05/2016	09:33:08	Yes	1	1	28-Dec-93		4	2	1		4	2321	4	5	1		3	0	0	0	0	0	1
Smoke-Free Recovery	Removal of randomiser	82047	1383	57439729-89c0-4d24-919a-57270a02f447		24/05/2016	09:53:47	No	1	2	11-Aug-70		4	1	1		4	2298	2	4	1		2	0	0	0	0	1	0
Smoke-Free Recovery	Removal of randomiser	82068	2184	5743e1ab-14c0-454b-8040-26970a02f447		24/05/2016	15:11:21	No	2	1	19-Aug-62		4	1	1		4	2570	1	3	1		6	1	0	0	0	0	0
Smoke-Free Recovery	Removal of randomiser	82070	2185	5743e62f-5d4c-4b40-89ad-26970a02f447		24/05/2016	15:31:55	No	2	1	11-Apr-84		1	1	1		4	2790	2	3	1		6	0	0	0	0	0	1	1		7	15	2	150	1	0	16-May-01	2	11=Going to see a GP|6=Self-help book or brochure|5=Nicotine Replacement Therapy (NRT) (gum, patches, inhaler, lozenge, spray) brought without a prescription (e.g. from the supermarket or chemist)|3=A stop-smoking medication prescribed by a doctor called Varenicline or Champix|10=Telephone support (like Quitline)|9=Internet support|4=Nicotine Replacement Therapy (NRT) (gum, patches, inhaler, loze…	0	0	0	0	0	0	0	0	0
Smoke-Free Recovery	Removal of randomiser	82114	1384	574653d8-1a60-4677-8ce6-7af80a02f447		26/05/2016	11:44:10	No	1	2	27-May-51		4	2	1		4	2850	2	3	2		1	0	0	0	0	1	0
Smoke-Free Recovery	Removal of randomiser	82122	1385	57465b11-1420-40b6-9f1d-26970a02f447		26/05/2016	12:15:22	Yes	1	1	26-Nov-91		4	2	1		4	2265	4	5	1		5	1	0	0	0	0	0
Smoke-Free Recovery	Removal of randomiser	82127	2186	574677f0-d63c-4c89-ad96-26910a02f447		26/05/2016	14:17:06	Yes	2	1	14-Nov-56		4	2	1		4	2173	2	5	1		6	1	0	0	0	0	0
Smoke-Free Recovery	Removal of randomiser	82140	2187	5747bee4-758c-4da9-98c3-57270a02f447		27/05/2016	13:30:13	Yes	2	1	8-Jan-84		1	1	1		4	2575	1	5	1		4	0	0	0	0	1	0	1		10	17	1	70	1	1	10-Aug-15	87	9=Internet support|4=Nicotine Replacement Therapy (NRT) (gum, patches, inhaler, lozenge, spray) recommended by a doctor|11=Going to see a GP|1=Own will-power, no help|5=Nicotine Replacement Therapy (NRT) (gum, patches, inhaler, lozenge, spray) brought without a prescription (e.g. from the supermarket or chemist)|7=Alternative therapies such as herbal or natural remedies, hypnosis, relaxation or a…	1	0	0	0	0	0	0	0	0
Smoke-Free Recovery	Removal of randomiser	82144	2188	57490173-a238-43be-977f-6b010a02f447		28/05/2016	12:25:38	No	2	1	16-Apr-62		1	1	1		4	2567	1	3	1		6	1	0	0	0	0	0	1		20	13	2	100	1	0	20-May-13	90	9=Internet support|10=Telephone support (like Quitline)|5=Nicotine Replacement Therapy (NRT) (gum, patches, inhaler, lozenge, spray) brought without a prescription (e.g. from the supermarket or chemist)|1=Own will-power, no help|3=A stop-smoking medication prescribed by a doctor called Varenicline or Champix|2=Stop-smoking medication prescribed by a doctor called Zyban, Prexaton or Bupropion|11=G…	0	0	0	0	0	0	0	0	0
Smoke-Free Recovery	Removal of randomiser	82146	2189	57490ed9-d860-4196-98fa-6b070a02f447		28/05/2016	13:22:58	No	2	1	6-May-53		4	2	1		4	2546	3	3	1		6	0	0	0	0	1	0
Smoke-Free Recovery	Removal of randomiser	82151	1386	574b796d-f7fc-4f6d-8d34-656b0a02f447		30/05/2016	09:25:55	No	1	1	13-Oct-94		2	1	1		1	2259	3	3	1		2	0	0	0	0	0	1	1		1	12	0	10	1	1	8-Mar-16	5	2=Stop-smoking medication prescribed by a doctor called Zyban, Prexaton or Bupropion|6=Self-help book or brochure|11=Going to see a GP|10=Telephone support (like Quitline)|5=Nicotine Replacement Therapy (NRT) (gum, patches, inhaler, lozenge, spray) brought without a prescription (e.g. from the supermarket or chemist)|7=Alternative therapies such as herbal or natural remedies, hypnosis, relaxation…	1	0	0	0	0	0	0	0	0
Smoke-Free Recovery	Removal of randomiser	82153	1387	574b7eb2-8008-446e-b6be-65660a02f447		30/05/2016	09:49:25	No	1	1	30-Aug-85		1	1	1		4	0	2	3	1		2	0	0	0	0	1	0	1		10	14	2	50	1	3	30-May-16	1	10=Telephone support (like Quitline)|9=Internet support|8=Group counselling|6=Self-help book or brochure|1=Own will-power, no help|7=Alternative therapies such as herbal or natural remedies, hypnosis, relaxation or accupuncture|5=Nicotine Replacement Therapy (NRT) (gum, patches, inhaler, lozenge, spray) brought without a prescription (e.g. from the supermarket or chemist)|2=Stop-smoking medicatio…	1	0	0	0	0	0	0	0	0
Smoke-Free Recovery	Removal of randomiser	82154	1388	574b8572-84f0-4430-a153-656a0a02f447		30/05/2016	10:12:35	No	1	2	31-Mar-40		4	2	1		4	2285	1	5	4		3	1	0	0	0	0	0
Smoke-Free Recovery	Removal of randomiser	82158	1389	574b8e88-67e8-4ab9-96dc-65660a02f447		30/05/2016	10:54:34	No	1	2	7-Feb-38		4	1	2	great britain	4	2318	5	5	2		1	0	0	0	0	1	0
Smoke-Free Recovery	Removal of randomiser	82165	1390	574ccf2d-c78c-478d-9a5f-65690a02f447		31/05/2016	09:42:54	Yes	1	1	27-Jun-96		4	2	1		1	2285	4	4	1		2	0	1	0	0	0	0
Smoke-Free Recovery	Removal of randomiser	82173	2190	574cf93b-8698-4a16-a136-65660a02f447		31/05/2016	13:01:47	Yes	2	1	22-Mar-81		4	2	2	Laos	4	2566	4	5	1		6	0	0	0	0	0	1
Smoke-Free Recovery	Removal of randomiser	82179	1391	574e6172-3ea0-4759-8f8d-65690a02f447		1/06/2016	14:20:57	No	1	1	16-Nov-52		4	1	1		4	2283	1	5	2		2	0	0	0	0	1	0
Smoke-Free Recovery	Removal of randomiser	82181	1392	574e6a39-36a4-442c-a9f3-65670a02f447		1/06/2016	14:55:51	No	1	1	31-Dec-58		1	1	1		4	2290	1	5	1		2	0	0	0	0	1	0	1		25	18	2	210	2
Smoke-Free Recovery	Removal of randomiser	82183	1393	574e6fa1-78e4-4032-aac5-65660a02f447		1/06/2016	15:19:23	No	1	1	2-Nov-43		4	1	1		1	2321	1	3	4		3	0	0	0	0	1	0
Smoke-Free Recovery	Removal of randomiser	82185	1394	574f828a-c0f8-4f5f-90fc-65690a02f447		2/06/2016	10:51:35	No	1	2	6-May-47		4	2	1		1	2323	5	2	2		1	0	0	0	0	1	0
Smoke-Free Recovery	Removal of randomiser	82187	1395	574f89a9-2bc8-496d-9c41-2fff0a02f447		2/06/2016	11:22:01	Yes	1	1	10-Oct-87		4	1	1		4	2333	2	3	1		3	0	0	0	0	0	1
Smoke-Free Recovery	Removal of randomiser	82190	1396	574f8d7c-4804-4809-980f-656a0a02f447		2/06/2016	11:39:04	No	1	1	9-Sep-56		4	2	1		4	2285	1	6	4		5	1	0	0	0	0	0
Smoke-Free Recovery	Removal of randomiser	82199	2191	57510670-b9b4-41ca-9a5d-656a0a02f447		3/06/2016	14:25:49	Yes	2	1	21-Aug-56		1	1	1		4	2211	4	3	5	Carer's pension	6	0	0	0	0	1	0	1		7	17	1	80	1	1	10-Sep-15	7	7=Alternative therapies such as herbal or natural remedies, hypnosis, relaxation or accupuncture|3=A stop-smoking medication prescribed by a doctor called Varenicline or Champix|8=Group counselling|9=Internet support|5=Nicotine Replacement Therapy (NRT) (gum, patches, inhaler, lozenge, spray) brought without a prescription (e.g. from the supermarket or chemist)|4=Nicotine Replacement Therapy (NRT…	1	0	0	0	0	0	0	0	0
Smoke-Free Recovery	Removal of randomiser	82201	2192	57510ad6-1dd8-4869-9bb8-656a0a02f447		3/06/2016	14:47:11	Yes	2	1	13-Dec-78		1	1	1		1	2577	4	3	1		2	0	0	0	0	1	0	2		15	16	2	80	1	6	19-Jun-13	15	4=Nicotine Replacement Therapy (NRT) (gum, patches, inhaler, lozenge, spray) recommended by a doctor|7=Alternative therapies such as herbal or natural remedies, hypnosis, relaxation or accupuncture|1=Own will-power, no help|10=Telephone support (like Quitline)|6=Self-help book or brochure|5=Nicotine Replacement Therapy (NRT) (gum, patches, inhaler, lozenge, spray) brought without a prescription (…	0	0	0	1	0	0	0	0	0
Smoke-Free Recovery	Removal of randomiser	82208	2193	57538441-0cf8-4992-b867-54220a02f447		5/06/2016	11:47:56	No	2	1	31-Aug-52		4	1	2	Germany	4	2164	2	4	1		6	1	0	0	0	0	0
Smoke-Free Recovery	Removal of randomiser	82210	1398	5754bd5b-db6c-4ebe-9327-54270a02f447		6/06/2016	10:04:26	No	1	2	4-Aug-71		1	1	1		4	2281	2	5	1		2	0	0	0	0	0	1	1		15	12	1	130	1	0	1-Oct-15	42	8=Group counselling|7=Alternative therapies such as herbal or natural remedies, hypnosis, relaxation or accupuncture|3=A stop-smoking medication prescribed by a doctor called Varenicline or Champix|11=Going to see a GP|1=Own will-power, no help|10=Telephone support (like Quitline)|9=Internet support|6=Self-help book or brochure|2=Stop-smoking medication prescribed by a doctor called Zyban, Prexat…	1	0	1	1	1	0	1	0	0
Smoke-Free Recovery	Removal of randomiser	82241	2194	5755152e-0f60-44f4-b5c9-54250a02f447		6/06/2016	16:18:27	Yes	2	2	6-Feb-48		4	2	2	Italy	4	2176	3	3	2		2	0	0	0	0	1	0
Smoke-Free Recovery	Removal of randomiser	82247	1399	57561812-4434-444f-a0d2-54230a02f447		7/06/2016	10:42:42	Yes	1	2	21-Apr-60		4	1	1		4	2283	1	4	1		2	1	0	0	0	0	0
Smoke-Free Recovery	Removal of randomiser	82249	1397	57561f8f-7780-4b05-be60-54230a02f447		7/06/2016	11:16:02	Yes	1	1	4-Sep-80		4	1	1		4	2325	3	5	1		4	0	0	1	0	0	0
Smoke-Free Recovery	Removal of randomiser	82251	1400	5756280a-b3b8-4617-b44e-54280a02f447		7/06/2016	11:56:04	Yes	1	2	7-May-52		4	1	1		4	2319	3	5	2		6	0	0	0	0	1	0
Smoke-Free Recovery	Removal of randomiser	82270	1401	57576167-0528-4dd1-99a7-54210a02f447		8/06/2016	10:08:50	Yes	1	1	31-Dec-88		4	1	1		4	2295	4	5	1		4	0	0	0	0	0	1
Smoke-Free Recovery	Removal of randomiser	82294	2195	57591fef-08d0-4aba-9244-54260a02f447		9/06/2016	17:55:26	Yes	2	1	11-Jul-79		4	2	1		4	2560	1	5	1		6	1	0	0	0	0	0
Smoke-Free Recovery	Removal of randomiser	82297	1402	5759fa2a-e548-496c-be57-54210a02f447		10/06/2016	09:25:02	Yes	1	1	18-Aug-82		4	2	1		4	2318	4	5	5	self employed	5	0	0	0	0	0	1
Smoke-Free Recovery	Removal of randomiser	82300	1403	5759fda2-7948-492f-94d8-54280a02f447		10/06/2016	09:39:22	Yes	1	1	15-Mar-78		4	2	1		4	2287	1	4	1		5	1	0	0	0	0	0
Smoke-Free Recovery	Removal of randomiser	82302	1404	575a00f6-5f08-4324-acd5-54240a02f447		10/06/2016	09:53:46	No	1	1	26-Jun-58		4	1	1		4	2400	4	3	2		1	0	0	0	0	1	0
Smoke-Free Recovery	Removal of randomiser	82309	1405	575a0a0f-8e24-4416-a37d-54260a02f447		10/06/2016	10:32:25	No	1	1	13-Mar-69		1	1	1		4	2304	4	3	2		1	0	0	0	0	1	0	2		20	14	2	65	1	0	10-Jun-08	21	1=Own will-power, no help|7=Alternative therapies such as herbal or natural remedies, hypnosis, relaxation or accupuncture|10=Telephone support (like Quitline)|6=Self-help book or brochure|4=Nicotine Replacement Therapy (NRT) (gum, patches, inhaler, lozenge, spray) recommended by a doctor|2=Stop-smoking medication prescribed by a doctor called Zyban, Prexaton or Bupropion|3=A stop-smoking medicat…	0	0	0	1	1	0	0	0	0
Smoke-Free Recovery	Removal of randomiser	82317	2196	575b6c78-728c-41f5-b664-1d850a02f447		11/06/2016	11:43:43	No	2	2	31-Oct-40		4	2	1		4	0	1	5	2		6	0	0	0	0	1	0
Smoke-Free Recovery	Removal of randomiser	82323	1406	575f530c-566c-47d5-a310-0b1c0a02f447		14/06/2016	10:46:20	No	1	1	22-Jun-94		3	1	1		4	2291	4	4	2		2	1	0	0	0	0	0	1		2	20	0	20	2
Smoke-Free Recovery	Removal of randomiser	82325	1407	575f54e2-0cd4-4ffc-968e-43c00a02f447		14/06/2016	10:55:35	No	1	1	11-May-47		4	2	1		4	2443	1	6	2		2	0	0	0	1	0	0
Smoke-Free Recovery	Removal of randomiser	82327	1408	575f5e1a-4c44-480e-aefb-43c00a02f447		14/06/2016	11:33:46	No	1	1	30-Aug-54		4	2	1		4	2321	1	5	1		2	0	0	0	0	1	0
Smoke-Free Recovery	Removal of randomiser	82330	1409	575f655e-4984-49ea-8a95-43c40a02f447		14/06/2016	12:06:10	Yes	1	1	25-Jul-83		4	1	1		4	2334	4	4	2		2	0	0	0	0	1	0
Smoke-Free Recovery	Removal of randomiser	82332	1410	575f7012-1af4-4b14-aabf-43c30a02f447		14/06/2016	12:49:25	Yes	1	2	28-Jan-55		4	1	1		4	2295	1	6	1		5	1	0	0	0	0	0
Smoke-Free Recovery	Removal of randomiser	82336	1411	57609496-5254-4e48-827a-0b1c0a02f447		15/06/2016	09:39:46	No	1	2	22-Jan-48		4	1	2	amsterdam	4	4655	1	3	2		2	1	0	0	0	0	0
Smoke-Free Recovery	Removal of randomiser	82339	1412	57609f51-96e0-4777-8de2-43c40a02f447		15/06/2016	10:23:12	No	1	1	21-Aug-74		4	2	1		1	2444	1	5	1		4	0	0	0	0	0	1
Smoke-Free Recovery	Removal of randomiser	82345	2197	5760d0b5-afa8-463a-8563-227f0a02f447		15/06/2016	14:11:43	Yes	2	2	3-Jul-41		4	1	2	Italy	4	2171	1	2	2		1	0	0	0	0	1	0
Smoke-Free Recovery	Removal of randomiser	82354	2199	57620e8c-0c64-44af-bdff-77330a02f447		16/06/2016	12:33:41	Yes	2	1	19-Dec-74		4	2	2	Zambia	4	2170	1	5	1		6	0	0	0	0	0	1
Smoke-Free Recovery	Removal of randomiser	82359	1413	57633dff-d914-46cd-a8cf-227f0a02f447		17/06/2016	10:05:54	Yes	1	2	23-Jan-94		4	3	1		1	2426	4	5	1		4	0	0	0	0	0	1
Smoke-Free Recovery	Removal of randomiser	82361	1414	57634199-a180-4bc9-a99f-43c40a02f447		17/06/2016	10:21:06	No	1	1	15-Jan-51		4	1	1		4	2293	1	4	1		5	1	0	0	0	0	0
Smoke-Free Recovery	Removal of randomiser	82363	1415	57634812-ec4c-4eb1-aede-77330a02f447		17/06/2016	10:49:23	No	1	1	1-Feb-63		1	1	1		4	2304	2	3	1		3	1	0	0	0	0	0	2		20	15	1	114	1	4	1-Feb-16	6	3=A stop-smoking medication prescribed by a doctor called Varenicline or Champix|7=Alternative therapies such as herbal or natural remedies, hypnosis, relaxation or accupuncture|2=Stop-smoking medication prescribed by a doctor called Zyban, Prexaton or Bupropion|11=Going to see a GP|9=Internet support|10=Telephone support (like Quitline)|5=Nicotine Replacement Therapy (NRT) (gum, patches, inhaler…	1	1	1	1	1	1	1	0	0
Smoke-Free Recovery	Removal of randomiser	82374	2198	5760db57-0494-483c-859c-43c40a02f447		19/06/2016	11:10:46	Yes	2	2	17-Oct-40		4	3	1		4	2168	5	5	2		2	0	0	0	0	1	0
Smoke-Free Recovery	Removal of randomiser	82375	2200	5765fd71-96f0-409e-a370-30770a02f447		19/06/2016	12:03:30	No	2	1	20-Jun-66		4	1	1		4	1464	4	4	2		6	0	0	0	0	1	0
Smoke-Free Recovery	Removal of randomiser	82379	1416	57672b04-0560-4ef9-b774-30750a02f447		20/06/2016	09:33:28	Yes	1	2	7-Oct-95		4	2	1		1	2308	4	4	3		1	1	0	0	0	0	0
Smoke-Free Recovery	Removal of randomiser	82381	1417	576730ca-e52c-4dd2-9405-30750a02f447		20/06/2016	09:57:10	Yes	1	2	7-May-74		4	1	1		4	2283	4	4	2		2	0	0	0	0	1	0
Smoke-Free Recovery	Removal of randomiser	82383	1418	57673597-c354-4acc-8ef6-30750a02f447		20/06/2016	10:19:27	No	1	2	8-Jan-43		4	1	1		4	6020	1	5	4		3	1	0	0	0	0	0
Smoke-Free Recovery	Removal of randomiser	82385	1419	57673e73-c8c8-47fc-b6fb-30750a02f447		20/06/2016	10:55:31	Yes	1	2	22-Nov-70		4	2	1		4	2283	1	3	1		3	1	0	0	0	0	0
Smoke-Free Recovery	Removal of randomiser	82387	1420	576741a7-9158-4e87-b045-30720a02f447		20/06/2016	11:11:19	Yes	1	1	18-Aug-59		4	1	1		4	2425	1	3	1		4	1	0	0	0	0	0
Smoke-Free Recovery	Removal of randomiser	82411	2201	5768b54e-c93c-4307-b6c7-30730a02f447		21/06/2016	13:34:12	Yes	2	2	21-Jan-56		4	2	2	South africa	4	2560	3	6	1		4	0	0	1	0	0	0
Smoke-Free Recovery	Removal of randomiser	82413	2202	5768c4dd-0608-4c53-ad8e-0fb30a02f447		21/06/2016	14:40:39	Yes	2	2	6-Jun-36		4	2	1		4	2168	1	2	2		2	0	0	0	0	1	0
Smoke-Free Recovery	Removal of randomiser	82415	2203	5768c729-c824-4634-adc0-30760a02f447		21/06/2016	14:55:07	Yes	2	2	16-Jul-90		4	2	2	England	4	2570	4	5	1		2	0	0	1	0	0	0
Smoke-Free Recovery	Removal of randomiser	82772	2204	576b5800-6258-43a2-9b48-30720a02f447		23/06/2016	13:34:09	No	2	1	27-Sep-63		1	1	2	Kuwait	4	2163	4	6	2		2	0	0	0	0	1	0	1		20	17	3	80	1	4	3-Apr-16	28	3=A stop-smoking medication prescribed by a doctor called Varenicline or Champix|8=Group counselling|5=Nicotine Replacement Therapy (NRT) (gum, patches, inhaler, lozenge, spray) brought without a prescription (e.g. from the supermarket or chemist)|4=Nicotine Replacement Therapy (NRT) (gum, patches, inhaler, lozenge, spray) recommended by a doctor|6=Self-help book or brochure|10=Telephone support …	1	0	1	0	0	0	1	0	1
Smoke-Free Recovery	Removal of randomiser	82833	1421	576c7e80-e348-4e05-b4dc-30730a02f447		24/06/2016	10:30:11	No	1	1	4-Nov-58		4	3	1		4	2422	4	4	1		2	1	0	0	0	0	0
Smoke-Free Recovery	Removal of randomiser	82836	1422	576c8506-f878-4f68-8898-30760a02f447		24/06/2016	11:01:57	Yes	1	2	21-Oct-58		4	1	1		4	2287	1	5	1		2	1	0	0	0	0	0
Smoke-Free Recovery	Removal of randomiser	82845	2205	576cb486-c404-47ac-af5f-30760a02f447		24/06/2016	14:19:37	Yes	2	1	25-Feb-93		4	2	2	Pakistan	4	2567	4	6	1		6	1	0	0	0	0	0
Smoke-Free Recovery	Removal of randomiser	82911	2006	55dd2251-db8c-4ca8-a80d-320c86948896		25/06/2016	10:13:13	No	2	2	30-May-94		4	1	1		4	2170	2	4	1		3	1	0	0	0	0	0
Smoke-Free Recovery	Removal of randomiser	82914	2207	576ddb09-39e0-4ddd-82dd-30740a02f447		25/06/2016	11:15:09	No	2	2	17-Oct-38		4	2	1		4	2564	5	3	2		6	0	0	0	0	1	0
Smoke-Free Recovery	Removal of randomiser	82915	2206	576dcc6e-d0fc-4907-af44-30740a02f447		25/06/2016	11:35:24	No	2	2	30-May-94		4	1	1		4	2170	2	4	1		3	1	0	0	0	0	0
Smoke-Free Recovery	Removal of randomiser	82977	1432	5771c0fc-6f50-4b1e-bc2b-0e0a0a02f447		28/06/2016	10:12:45	No	1	1	5-Mar-72		4	3	1		1	2280	2	3	1		3	0	0	0	0	0	1
Smoke-Free Recovery	Removal of randomiser	82979	1424	5771c545-19a0-4129-a479-53390a02f447		28/06/2016	10:39:45	No	1	1	19-Feb-90		1	1	1		4	2325	4	5	1		5	0	0	0	0	0	1	1		15	21	3	150	1	1	25-Jun-16	4	7=Alternative therapies such as herbal or natural remedies, hypnosis, relaxation or accupuncture|10=Telephone support (like Quitline)|8=Group counselling|6=Self-help book or brochure|9=Internet support|3=A stop-smoking medication prescribed by a doctor called Varenicline or Champix|1=Own will-power, no help|11=Going to see a GP|5=Nicotine Replacement Therapy (NRT) (gum, patches, inhaler, lozenge,…	1	0	1	0	0	0	0	0	0
Smoke-Free Recovery	Removal of randomiser	83008	2208	57734c6e-1c74-46f0-b566-3d410a02f447		29/06/2016	14:21:51	No	2	1	8-May-57		1	1	1		4	2168	4	4	2		6	0	0	0	0	1	0	2		20	16	1	170	1	1	18-Feb-16	4	11=Going to see a GP|4=Nicotine Replacement Therapy (NRT) (gum, patches, inhaler, lozenge, spray) recommended by a doctor|3=A stop-smoking medication prescribed by a doctor called Varenicline or Champix|2=Stop-smoking medication prescribed by a doctor called Zyban, Prexaton or Bupropion|1=Own will-power, no help|8=Group counselling|5=Nicotine Replacement Therapy (NRT) (gum, patches, inhaler, loze…	0	0	1	0	0	0	0	0	0
Smoke-Free Recovery	Removal of randomiser	83014	1425	57745b1e-cc3c-4d81-a708-53330a02f447		30/06/2016	09:41:23	No	1	1	5-May-50		4	1	1		4	2280	4	3	2		2	1	0	0	0	0	0
Smoke-Free Recovery	Removal of randomiser	83016	1426	577468db-cfc8-4b13-b687-53320a02f447		30/06/2016	10:39:24	No	1	1	29-Apr-46		4	2	1		4	2324	2	6	4		2	0	0	0	0	1	0
Smoke-Free Recovery	With new branching	77935	1019	5525b54f-8994-4efe-810c-64ad86948896		21/07/2015	09:28:43	No	1	1	11-Aug-87		1	1	1		4	2333	2	5	1		3	0	0	0	0	0	1	2		10	18	0	35	1	1	15-Oct-14	10	7=Alternative therapies such as herbal or natural remedies, hypnosis, relaxation or accupuncture|8=Group counselling|9=Internet support|11=Going to see a GP|10=Telephone support (like Quitline)|5=Nicotine Replacement Therapy (NRT) (gum, patches, inhaler, lozenge, spray) brought without a prescription (e.g. from the supermarket or chemist)|4=Nicotine Replacement Therapy (NRT) (gum, patches, inhale…	1	0	0	0	0	0	0	0	0
Smoke-Free Recovery	With new branching	77937	1020	5523474a-0c54-48fa-925c-0db986948896		21/07/2015	09:35:32	No	1	2	10-May-47		4	2	2	Germany	4	2306	3	4	2		2	1	0	0	0	0	0
Smoke-Free Recovery	With new branching	77955	1021	5525cb45-25c0-46d6-a7b1-64ae86948896		23/07/2015	09:15:38	Yes	1	1	22-Apr-15		4	2	1		4	2282	4	5	1		1	0	0	0	0	0	1
Smoke-Free Recovery	With new branching	77958	1022	5527134d-fc44-473e-bff9-6b9e86948896		23/07/2015	09:28:05	No	1	2	22-Jul-43		4	2	1		4	2290	1	6	4		3	1	0	0	0	0	0
Smoke-Free Recovery	With new branching	77959	1023	552717af-dbe0-4d64-9ce0-362a86948896		23/07/2015	09:51:33	Yes	1	2	22-Feb-80		4	2	1		4	2448	1	3	5	Partner in a company(self employed)	2	0	0	0	0	0	1
Smoke-Free Recovery	With new branching	77992	1024	552b0c99-eea8-4478-99cd-2bda86948896		23/07/2015	13:22:52	No	1	2	10-Oct-55		4	2	1		4	2298	3	3	1		2	0	0	0	0	0	1
Smoke-Free Recovery	With new branching	78009	1017	5524839f-b458-495b-9364-3cc186948896		27/07/2015	09:59:58	Yes	1	1	29-Aug-93		4	2	1		4	2287	4	5	1		3	0	1	0	0	0	0
Smoke-Free Recovery	With new branching	78011	1025	552b32d4-5190-4905-8aa3-693886948896		27/07/2015	10:15:35	No	1	1	16-Oct-69		1	1	1		4	2264	2	3	1		3	0	0	0	0	0	1	1		12	15	2	70	1	1	1-Feb-14	210	11=Going to see a GP|4=Nicotine Replacement Therapy (NRT) (gum, patches, inhaler, lozenge, spray) recommended by a doctor|7=Alternative therapies such as herbal or natural remedies, hypnosis, relaxation or accupuncture|1=Own will-power, no help|10=Telephone support (like Quitline)|6=Self-help book or brochure|8=Group counselling|3=A stop-smoking medication prescribed by a doctor called Vareniclin…	0	0	1	0	0	0	0	0	0
Smoke-Free Recovery	With new branching	78013	1009	55233887-7514-402f-a832-7efc86948896		27/07/2015	10:48:29	No	1	1	28-Nov-42		4	2	1		4	2290	1	5	2		3	1	0	0	0	0	0
Smoke-Free Recovery	With new branching	78014	1026	552b388b-3254-4a88-afc0-200486948896		27/07/2015	11:17:43	Yes	1	1	9-Nov-75		4	1	1		4	2304	1	6	1		3	0	0	0	0	0	1
Smoke-Free Recovery	With new branching	78015	1027	552b4006-cb78-4ae4-92e6-200486948896		27/07/2015	11:23:42	No	1	2	30-Mar-45		4	2	1		4	2299	1	3	2		2	0	1	0	0	0	0
Smoke-Free Recovery	With new branching	78016	1028	552c4e42-990c-40aa-860d-30c686948896		27/07/2015	11:36:28	No	1	2	27-Nov-39		4	2	2	Germany	4	2283	1	2	2		1	0	0	0	0	1	0
Smoke-Free Recovery	With new branching	78031	1030	552c52e6-36fc-4651-a236-2bda86948896		29/07/2015	08:51:24	No	1	1	6-Nov-93		1	1	1		1	0	5	2	1		2	0	0	0	0	0	1	5		1	16	3	1	1	0	11-Jul-12	7	3=A stop-smoking medication prescribed by a doctor called Varenicline or Champix|1=Own will-power, no help|9=Internet support|5=Nicotine Replacement Therapy (NRT) (gum, patches, inhaler, lozenge, spray) brought without a prescription (e.g. from the supermarket or chemist)|10=Telephone support (like Quitline)|4=Nicotine Replacement Therapy (NRT) (gum, patches, inhaler, lozenge, spray) recommended …	0	1	0	0	0	0	0	0	0
Smoke-Free Recovery	With new branching	78062	1029	552c5147-bad4-4172-be1d-200486948896		31/07/2015	14:14:18	No	1	2	29-Sep-45		4	1	1		4	2317	3	6	2		3	0	0	0	0	1	0
Smoke-Free Recovery	With new branching	78063	1031	552da9c1-4624-44e0-a85e-335f86948896		31/07/2015	14:34:04	Yes	1	2	21-Jan-53		4	1	1		4	2290	1	6	4		5	1	0	0	0	0	0
Smoke-Free Recovery	With new branching	78065	1032	552db40d-6318-445a-b56a-335f86948896		31/07/2015	14:55:13	No	1	1	29-Jun-88		4	1	1		4	2320	2	5	1		5	0	1	0	0	0	0
Smoke-Free Recovery	With new branching	78115	1033	552dcd22-0a48-48a9-91dc-74ae86948896		3/08/2015	10:01:41	Yes	1	2	14-Mar-15		4	1	1		1	2321	4	6	2		2	0	0	0	0	1	0
Smoke-Free Recovery	With new branching	78118	1035	552f05d4-7554-45b5-b0b7-788f86948896		3/08/2015	11:18:19	No	1	2	6-Sep-40		4	1	1		4	2795	3	6	2		2	0	0	0	0	1	0
Smoke-Free Recovery	With new branching	78132	1034	552ef95d-5124-405f-99fb-4bf786948896		5/08/2015	10:02:12	No	1	1	5-May-51		4	2	1		4	2290	1	5	2		3	0	0	0	0	1	0
Smoke-Free Recovery	With new branching	78134	1036	552f0b32-cdcc-4ee4-bec6-5c2b86948896		5/08/2015	10:39:52	No	1	2	10-May-70		2	1	1		4	2290	1	3	1		2	1	0	0	0	0	0	1		5	13	0	30	1	2	5-Aug-15	2	1=Own will-power, no help|10=Telephone support (like Quitline)|6=Self-help book or brochure|3=A stop-smoking medication prescribed by a doctor called Varenicline or Champix|11=Going to see a GP|8=Group counselling|9=Internet support|4=Nicotine Replacement Therapy (NRT) (gum, patches, inhaler, lozenge, spray) recommended by a doctor|5=Nicotine Replacement Therapy (NRT) (gum, patches, inhaler, loze…	0	0	0	0	1	0	0	0	0
Smoke-Free Recovery	With new branching	78136	1037	552f11e2-55dc-49c7-b027-4bf786948896		5/08/2015	11:08:12	No	1	1	31-May-41		4	2	1		4	2290	4	3	2		3	0	0	0	0	1	0
Smoke-Free Recovery	With new branching	78161	1038	552f17ac-cb6c-42c7-8c1a-4bf786948896		7/08/2015	08:39:22	No	1	1	26-Jan-68		4	2	1		4	2325	1	3	2		2	0	0	0	0	1	0
Smoke-Free Recovery	With new branching	78162	1039	55304b13-0678-457a-b223-13c586948896		7/08/2015	08:48:57	Yes	1	2	22-Jul-77		4	2	1		4	2278	1	5	1		5	1	0	0	0	0	0
Smoke-Free Recovery	With new branching	78164	1040	553052ad-14ac-4203-94f8-332686948896		7/08/2015	08:57:20	Yes	1	1	22-Apr-55		4	1	2	Northern Ireland	4	2319	1	5	2		2	0	0	0	0	1	0
Smoke-Free Recovery	With new branching	78187	1041	5530528c-d1f0-46a8-a6a2-41d786948896		10/08/2015	09:16:11	No	1	1	16-Jul-57		4	2	1		4	2333	1	6	1		6	1	0	0	0	0	0
Smoke-Free Recovery	With new branching	78189	1042	5531a84e-1bfc-4e68-bf1f-6ac886948896		10/08/2015	09:27:42	Yes	1	2	18-Jul-57		4	2	1		4	2287	1	3	3		4	1	0	0	0	0	0
Smoke-Free Recovery	With new branching	78190	1043	5531b0ca-6254-47b0-a635-41d786948896		10/08/2015	09:31:40	No	1	2	26-Apr-56		1	1	1		4	2280	3	3	2		2	0	0	0	0	1	0	1		20	19	2	100	1	1	1-Aug-79	430	9=Internet support|4=Nicotine Replacement Therapy (NRT) (gum, patches, inhaler, lozenge, spray) recommended by a doctor|3=A stop-smoking medication prescribed by a doctor called Varenicline or Champix|7=Alternative therapies such as herbal or natural remedies, hypnosis, relaxation or accupuncture|6=Self-help book or brochure|11=Going to see a GP|8=Group counselling|2=Stop-smoking medication presc…	1	0	0	0	0	0	0	0	0
Smoke-Free Recovery	With new branching	78194	1044	5531b95c-e480-4d6c-85cd-33f986948896		10/08/2015	09:56:01	Yes	1	1	26-Dec-72		4	2	1		4	2226	1	6	1		5	1	0	0	0	0	0
Smoke-Free Recovery	With new branching	78196	1045	55331721-46f0-4b99-b194-3f6486948896		10/08/2015	10:15:34	No	1	1	2-Nov-86		4	1	1		4	2428	2	6	1		6	0	1	0	0	0	0
Smoke-Free Recovery	With new branching	78198	1046	5533173a-2f54-4119-9328-256286948896		10/08/2015	10:50:43	No	1	2	20-Feb-49		4	1	2	New Zealand	4	2899	1	3	1		6	1	0	0	0	0	0
Smoke-Free Recovery	With new branching	78200	1047	55332029-5888-451b-876d-21b386948896		10/08/2015	14:04:20	Yes	1	1	31-Jul-71		4	1	2	New Zealand	4	2281	1	5	1		4	0	1	0	0	0	0
Smoke-Free Recovery	With new branching	78202	1048	553327c9-a18c-4e0c-a901-704b86948896		10/08/2015	14:34:32	No	1	2	30-Mar-92		4	1	1		4	2430	1	3	2		2	0	0	0	0	1	0
Smoke-Free Recovery	With new branching	78205	1049	55332db2-405c-45dd-b717-21b486948896		11/08/2015	10:44:12	No	1	1	2-Oct-95		1	1	1		4	2296	4	4	1		1	1	0	0	0	0	0	1		10	15	1	60	1	3	1-Aug-15	3	11=Going to see a GP|5=Nicotine Replacement Therapy (NRT) (gum, patches, inhaler, lozenge, spray) brought without a prescription (e.g. from the supermarket or chemist)|6=Self-help book or brochure|7=Alternative therapies such as herbal or natural remedies, hypnosis, relaxation or accupuncture|1=Own will-power, no help|3=A stop-smoking medication prescribed by a doctor called Varenicline or Champi…	1	0	0	0	0	0	0	0	0
Smoke-Free Recovery	With new branching	78206	1050	55331788-c144-41cc-afb4-573486948896		11/08/2015	10:47:11	Yes	1	1	28-Mar-91		4	2	1		4	2283	4	5	2		6	1	0	0	0	0	0
Smoke-Free Recovery	With new branching	78210	1051	55345276-84d0-4300-9442-6e5886948896		11/08/2015	11:42:58	No	1	2	23-Nov-64		4	1	1		4	2320	1	6	1		5	0	0	0	0	0	1
[truncated: 139 more columns]
